# Supplementary material for: Multiple-functionalizations of terminal alkynes with sodium sulfinates andtert-butyl nitrite: facile synthesis of 2H-azirines
Source: Royal Society of Chemistry journal article supplement (doi:10.1039/c9cc00625g), 2019-01-01
Supplement: c9cc00625g1.pdf [file c9cc00625g1.pdf]

# Supplementary Information

## Multiple-Functionalizations of Terminal Alkynes with Sodium Sulfinates and *tert*-Butyl Nitrite: Facile Synthesis of 2*H*-Azirines

Xingyi He, Xin Yue, Lei Zhang, Shuang Wu, Ming Hu\*, and Jin-Heng Li\*

*Key Laboratory of Jiangxi Province for Persistent Pollutants Control and Resources Recycle, Nanchang Hangkong University, Nanchang 330063, China, State Key Laboratory of Chemo/Biosensing and Chemometrics, Hunan University, Changsha 410082, China, and State Key Laboratory of Applied Organic Chemistry Lanzhou University, Lanzhou 730000, China*

E-mail: [huming0731@163.com](mailto:huming0731@163.com) and [jhli@hnu.edu.cn](mailto:jhli@hnu.edu.cn)

### List of Contents

- (A) General Experimental Procedures
- (B) Analytical data
- (C) Spectra
- (D) The X-ray single-crystal diffraction analysis of 3aa

## (A) General Experimental Procedures

### (a) General Procedures for the Tandem Annulation of Terminal Alkynes (1) with Sodium Sulfinates (2) and *tert*-Butyl Nitrite: Facile Synthesis of 2*H*-Azirines (3):

To a Schlenk tube were added alkyne **1** (0.2 mmol), sodium sulfinate **2** (3 equiv), *t*-BuONO (3 equiv), and DCE (2 mL). Then the mixture was stirred at 50 °C (oil bath temperature) under argon atmosphere (1 atm) for 8 h until complete consumption of starting material as monitored by TLC and GC-MS analysis. After the reaction was finished, the reaction mixture was washed with brine. The aqueous phase was re-extracted with EtOAc (3×10 mL). The combined organic extracts were dried over Na<sub>2</sub>SO<sub>4</sub> and concentrated in vacuum. The residue was purified by silica gel flash column chromatography (hexane/ethyl acetate = 8 : 1) to afford the desired product **3**.

## (B) Analytical data

### 3-(4-Bromophenyl)-2,2-ditosyl-2*H*-azirine (**3aa**):

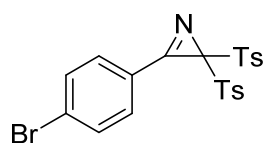

Yellow solid; <sup>1</sup>H NMR (500 MHz, CDCl<sub>3</sub>) δ: 7.73 (d, *J* = 4.0 Hz, 4H), 7.70 (d, *J* = 8.0 Hz, 4H), 7.29 (d, *J* = 8.0 Hz, 4H), 2.46 (s, 6H); <sup>13</sup>C NMR (125 MHz, CDCl<sub>3</sub>) δ: 158.3, 146.0, 134.6, 133.2, 133.1, 131.6, 129.6, 129.5, 117.7, 69.7, 21.8; HRMS *m/z* (ESI) calcd for C<sub>22</sub>H<sub>19</sub><sup>79</sup>BrNO<sub>4</sub>S<sub>2</sub> (M+H)<sup>+</sup> 503.9933, found 503.9941.

### 3-Phenyl-2,2-ditosyl-2*H*-azirine (**3ba**):

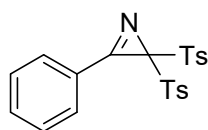

Yellow solid; <sup>1</sup>H NMR (500 MHz, CDCl<sub>3</sub>) δ: 7.87 (d, *J* = 7.5 Hz, 2H), 7.73 (t, *J* = 8.0 Hz, 1H), 7.72 (d, *J* = 8.5 Hz, 4H), 7.59 (t, *J*

= 8.0 Hz, 2H), 7.29 (d,  $J = 8.0$  Hz, 4H), 2.46 (s, 6H);  $^{13}\text{C}$  NMR (125 MHz,  $\text{CDCl}_3$ )  $\delta$ : 158.7, 145.8, 135.8, 134.8, 132.1, 129.6 (3C), 118.8, 69.7, 21.8; HRMS  $m/z$  (ESI) calcd for  $\text{C}_{22}\text{H}_{20}\text{NO}_4\text{S}_2$  ( $\text{M}+\text{H}$ ) $^+$  426.0828, found 426.0836.

### 3-(*p*-Tolyl)-2,2-ditosyl-2*H*-azirine (3ca):

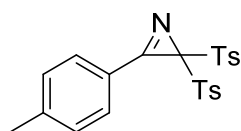

Yellow solid;  $^1\text{H}$  NMR (500 MHz,  $\text{CDCl}_3$ )  $\delta$ : 7.75 (d,  $J = 8.0$  Hz, 2H), 7.72 (d,  $J = 8.0$  Hz, 4H), 7.38 (d,  $J = 8.0$  Hz, 2H), 7.29 (d,  $J = 8.0$  Hz, 4H), 2.49 (s, 3H), 2.46 (s, 6H);  $^{13}\text{C}$  NMR (125 MHz,  $\text{CDCl}_3$ )  $\delta$ : 158.2, 147.6, 145.7, 134.9, 132.2, 130.4, 129.5 (2C), 115.9, 69.7, 22.2, 21.8; HRMS  $m/z$  (ESI) calcd for  $\text{C}_{23}\text{H}_{22}\text{NO}_4\text{S}_2$  ( $\text{M}+\text{H}$ ) $^+$  440.0985, found 440.1001.

### 3-(4-Methoxyphenyl)-2,2-ditosyl-2*H*-azirine (3da):

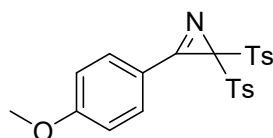

Yellow solid;  $^1\text{H}$  NMR (500 MHz,  $\text{CDCl}_3$ )  $\delta$ : 7.81 (d,  $J = 7.5$  Hz, 2H), 7.71 (d,  $J = 7.5$  Hz, 4H), 7.28 (d,  $J = 8.0$  Hz, 4H), 7.05 (d,  $J = 7.5$  Hz, 2H), 3.92 (s, 3H), 2.46 (s, 6H);  $^{13}\text{C}$  NMR (125 MHz,  $\text{CDCl}_3$ )  $\delta$ : 165.6, 157.0, 145.6, 135.0, 134.5, 129.5 (2C), 115.3, 110.7, 69.8, 55.9, 21.8; HRMS  $m/z$  (ESI) calcd for  $\text{C}_{23}\text{H}_{22}\text{NO}_5\text{S}_2$  ( $\text{M}+\text{H}$ ) $^+$  456.0934, found 456.0945.

### 3-(4-Chlorophenyl)-2,2-ditosyl-2*H*-azirine (3ea):

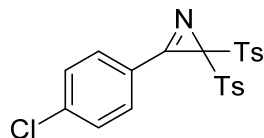

Yellow solid;  $^1\text{H}$  NMR (500 MHz,  $\text{CDCl}_3$ )  $\delta$ : 7.81 (d,  $J = 8.5$  Hz, 2H), 7.69 (d,  $J = 8.0$  Hz, 4H), 7.57 (d,  $J = 8.5$  Hz, 2H), 7.29 (d,  $J = 8.0$  Hz, 4H), 2.46 (s, 6H);  $^{13}\text{C}$  NMR (125 MHz,  $\text{CDCl}_3$ )  $\delta$ : 158.1, 146.0, 142.7, 134.6, 133.2, 130.2, 129.6, 129.5, 117.27, 69.73, 21.77; HRMS  $m/z$  (ESI) calcd for  $\text{C}_{22}\text{H}_{19}^{35}\text{ClNO}_4\text{S}_2$  ( $\text{M}+\text{H}$ ) $^+$  460.0439, found 460.0445.

#### 4-(2,2-Ditosyl-2H-azirin-3-yl)benzonitrile (3fa):

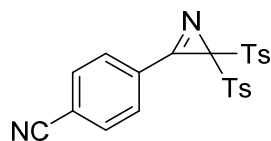

Yellow solid;  $^1\text{H}$  NMR (500 MHz,  $\text{CDCl}_3$ )  $\delta$ : 8.01 (d,  $J = 8.5$  Hz, 2H), 7.89 (d,  $J = 8.5$  Hz, 2H), 7.67 (d,  $J = 8.0$  Hz, 4H), 7.30 (d,  $J = 8.0$  Hz, 4H), 2.47 (s, 6H);  $^{13}\text{C}$  NMR (125 MHz,  $\text{CDCl}_3$ )  $\delta$ : 158.7, 146.2, 134.2, 133.2, 132.2, 129.7, 129.5, 122.9, 118.9, 117.1, 69.8, 21.8; HRMS  $m/z$  (ESI) calcd for  $\text{C}_{23}\text{H}_{19}\text{N}_2\text{O}_4\text{S}_2$  ( $\text{M}+\text{H}$ ) $^+$  451.0781, found 451.0792.

#### 3-(4-Nitrophenyl)-2,2-ditosyl-2H-azirine (3ga):

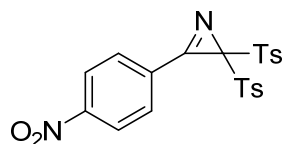

Yellow solid;  $^1\text{H}$  NMR (500 MHz,  $\text{CDCl}_3$ )  $\delta$ : 8.44 (d,  $J = 8.5$  Hz, 2H), 8.10 (d,  $J = 9.0$  Hz, 2H), 7.68 (d,  $J = 8.5$  Hz, 4H), 7.31 (d,  $J = 8.0$  Hz, 4H), 2.49 (s, 6H);  $^{13}\text{C}$  NMR (125 MHz,  $\text{CDCl}_3$ )  $\delta$ : 158.7, 151.6, 146.3, 134.2, 133.0, 129.8, 129.6, 124.7, 124.5, 69.9, 21.8; HRMS  $m/z$  (ESI) calcd for  $\text{C}_{22}\text{H}_{19}\text{N}_2\text{O}_6\text{S}_2$  ( $\text{M}+\text{H}$ ) $^+$  471.0679, found 471.0693.

#### 3-(*m*-Tolyl)-2,2-ditosyl-2H-azirine (3ha):

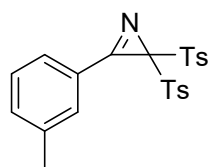

Yellow solid;  $^1\text{H}$  NMR (500 MHz,  $\text{CDCl}_3$ )  $\delta$ : 7.72 (d,  $J = 8.0$  Hz, 4H), 7.69 (d,  $J = 7.5$  Hz, 1H), 7.57 (s, 1H), 7.52 (d,  $J = 7.5$  Hz, 1H), 7.46 (t,  $J = 7.5$  Hz, 1H), 7.29 (d,  $J = 8.5$  Hz, 4H), 2.46 (s, 6H), 2.40 (s, 3H);  $^{13}\text{C}$  NMR (125 MHz,  $\text{CDCl}_3$ )  $\delta$ : 158.6, 145.7, 139.7, 136.7, 134.9, 132.5, 129.6 (2C), 129.5, 129.3, 118.5, 69.7, 21.8, 21.1; HRMS  $m/z$  (ESI) calcd for  $\text{C}_{23}\text{H}_{22}\text{NO}_4\text{S}_2$  ( $\text{M}+\text{H}$ ) $^+$  440.0985, found 440.0994.

#### 3-(*o*-Tolyl)-2,2-ditosyl-2H-azirine (3ia):

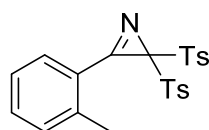

Yellow solid;  $^1\text{H}$  NMR (500 MHz,  $\text{CDCl}_3$ )  $\delta$ : 7.69 (d,  $J = 8.0$  Hz, 4H), 7.60 (t,  $J = 8.0$  Hz, 1H), 7.57 (d,  $J = 8.0$  Hz, 1H), 7.35 (t,  $J$

= 7.5 Hz, 1H), 7.27 (d,  $J = 8.5$  Hz, 4H), 2.76 (s, 3H), 2.46 (s, 6H);  $^{13}\text{C}$  NMR (100 MHz,  $\text{CDCl}_3$ )  $\delta$ : 157.7, 145.7, 143.6, 135.5, 134.8, 134.4, 131.2, 129.5, 126.7, 117.9, 68.0, 21.8, 20.3; HRMS  $m/z$  (ESI) calcd for  $\text{C}_{23}\text{H}_{22}\text{NO}_4\text{S}_2$  ( $\text{M}+\text{H}$ ) $^+$  440.0985, found 440.0991.

### 3-(Naphthalen-2-yl)-2,2-ditosyl-2H-azirine (3ja):

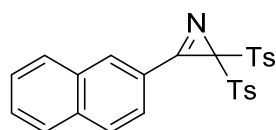

Yellow solid;  $^1\text{H}$  NMR (500 MHz,  $\text{CDCl}_3$ )  $\delta$ : 8.21 (s, 1H), 8.02 (d,  $J = 7.5$  Hz, 1H), 7.94 (d,  $J = 7.5$  Hz, 2H), 7.88 (d,  $J = 7.5$  Hz, 1H), 7.76 (d,  $J = 7.5$  Hz, 4H), 7.72 (t,  $J = 7.0$  Hz, 1H), 7.64 (t,  $J = 7.5$  Hz, 1H), 7.30 (d,  $J = 8.0$  Hz, 4H);  $^{13}\text{C}$  NMR (125 MHz,  $\text{CDCl}_3$ )  $\delta$ : 158.8, 145.9, 136.6, 135.8, 135.1, 132.5, 130.4, 129.8, 129.7 (2C), 129.6, 128.3, 127.8, 125.2, 115.9, 70.02, 21.83; HRMS  $m/z$  (ESI) calcd for  $\text{C}_{26}\text{H}_{22}\text{NO}_4\text{S}_2$  ( $\text{M}+\text{H}$ ) $^+$  476.0985, found 476.0998.

### 3-(Thiophen-3-yl)-2,2-ditosyl-2H-azirine (3ka):

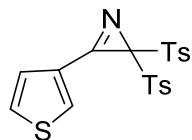

Yellow solid;  $^1\text{H}$  NMR (500 MHz,  $\text{CDCl}_3$ )  $\delta$ : 8.04 (d,  $J = 4.5$  Hz, 1H), 7.74 (d,  $J = 8.0$  Hz, 4H), 7.70 (d,  $J = 3.5$  Hz, 1H), 7.30 (d,  $J = 8.5$  Hz, 4H), 7.28 (s, 1H), 2.47 (s, 6H);  $^{13}\text{C}$  NMR (125 MHz,  $\text{CDCl}_3$ )  $\delta$ : 151.7, 145.9, 139.4, 139.2, 134.7, 129.6 (2C), 129.3, 120.2, 70.2, 21.8; HRMS  $m/z$  (ESI) calcd for  $\text{C}_{20}\text{H}_{18}\text{NO}_4\text{S}_3$  ( $\text{M}+\text{H}$ ) $^+$  432.0393, found 432.0395.

### 3-Cyclohexyl-2,2-ditosyl-2H-azirine (3la):

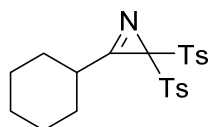

White solid;  $^1\text{H}$  NMR (500 MHz,  $\text{CDCl}_3$ )  $\delta$ : 7.56 (d,  $J = 8.0$  Hz, 4H), 7.22 (d,  $J = 8.0$  Hz, 4H), 3.12-3.07 (m, 1H), 2.44 (s, 6H), 2.18-2.13 (m, 2H), 1.90-1.86 (m, 2H), 1.75-1.67 (m, 4H), 1.47-1.34 (m, 4H);  $^{13}\text{C}$  NMR (125 MHz,  $\text{CDCl}_3$ )  $\delta$ : 166.0, 145.5, 134.5, 129.4, 129.2, 69.1, 35.7, 28.3, 25.3,

24.9, 21.7; HRMS  $m/z$  (ESI) calcd for  $C_{22}H_{26}NO_4S_2$  (M+H)<sup>+</sup> 432.1298, found 432.1305.

**3-Benzyl-2,2-ditosyl-2H-azirine (3ma):**

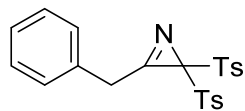

Colorless oil; <sup>1</sup>H NMR (500 MHz, CDCl<sub>3</sub>)  $\delta$ : 7.56 (d,  $J$  = 8.5 Hz, 4H), 7.40 (s, 5H), 7.23 (d,  $J$  = 8.0 Hz, 4H), 4.38 (s, 2H), 2.44 (s, 6H); <sup>13</sup>C NMR (125 MHz, CDCl<sub>3</sub>)  $\delta$ : 163.5, 145.8, 134.5, 130.1, 129.6, 129.4 (2C), 129.3, 128.4, 69.0, 32.8, 21.8; HRMS  $m/z$  (ESI) calcd for  $C_{23}H_{22}NO_4S_2$  (M+H)<sup>+</sup> 440.0985, found 440.0997.

**3-Pentyl-2,2-ditosyl-2H-azirine (3na):**

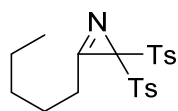

Colorless oil; <sup>1</sup>H NMR (500 MHz, CDCl<sub>3</sub>)  $\delta$ : 7.63 (d,  $J$  = 8.5 Hz, 4H), 7.27 (d,  $J$  = 8.0 Hz, 4H), 3.01 (t,  $J$  = 7.5 Hz, 2H), 2.45 (s, 6H), 1.91-1.85 (m, 2H), 1.52-1.45 (m, 2H), 1.42-1.36 (m, 2H), 0.93 (t,  $J$  = 7.5 Hz, 3H); <sup>13</sup>C NMR (125 MHz, CDCl<sub>3</sub>)  $\delta$ : 163.9, 145.7, 134.6, 129.6, 129.3, 68.4, 30.9, 26.2, 24.0, 22.1, 21.7, 13.8; HRMS  $m/z$  (ESI) calcd for  $C_{21}H_{26}NO_4S_2$  (M+H)<sup>+</sup> 420.1298, found 420.1309.

**3-(3-Chloropropyl)-2,2-ditosyl-2H-azirine (3oa):**

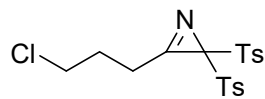

Colorless oil; <sup>1</sup>H NMR (500 MHz, CDCl<sub>3</sub>)  $\delta$ : 7.63 (d,  $J$  = 8.0 Hz, 4H), 7.28 (d,  $J$  = 8.0 Hz, 4H), 3.73 (t,  $J$  = 6.0 Hz, 2H), 3.25 (t,  $J$  = 7.5 Hz, 2H), 2.46 (s, 6H), 2.38-2.33 (m, 2H); <sup>13</sup>C NMR (125 MHz, CDCl<sub>3</sub>)  $\delta$ : 163.4, 145.9, 134.4, 129.7, 129.3, 68.3, 43.0, 27.3, 23.5, 21.8; HRMS  $m/z$  (ESI) calcd for  $C_{19}H_{21}^{35}ClNO_4S_2$  (M+H)<sup>+</sup> 426.0595, found 426.0603.

**Methyl 9-(2,2-ditosyl-2H-azirin-3-yl)nonanoate (3pa):**

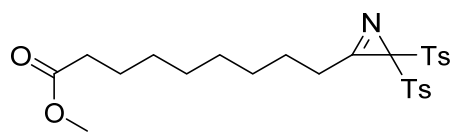

Yellow oil;  $^1\text{H}$  NMR (500 MHz,  $\text{CDCl}_3$ )  $\delta$ :  
7.62 (d,  $J = 8.5$  Hz, 4H), 7.27 (d,  $J = 8.0$  Hz, 4H),

3.67 (s, 3H), 3.02 (t,  $J = 7.5$  Hz, 2H), 2.45 (s, 6H), 2.32 (t,  $J = 7.5$  Hz, 2H), 1.90-1.84 (m, 2H), 1.66-1.61 (m, 4H), 1.53-1.47 (m, 2H), 1.37-1.33 (m, 4H);  $^{13}\text{C}$  NMR (125 MHz,  $\text{CDCl}_3$ )  $\delta$ : 174.3, 163.8, 145.7, 134.6, 129.6, 129.3, 68.4, 51.5, 34.0, 29.0, 28.9, 28.8, 28.7, 26.2, 24.8, 24.3, 21.7; HRMS  $m/z$  (ESI) calcd for  $\text{C}_{26}\text{H}_{34}\text{NO}_6\text{S}_2$  ( $\text{M}+\text{H}$ ) $^+$  520.1822, found 520.1825.

**1,3-Bis(2,2-ditosyl-2H-azirin-3-yl)benzene (3qa):**

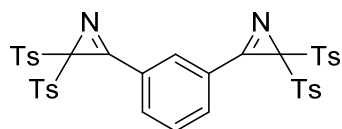

Yellow solid;  $^1\text{H}$  NMR (500 MHz,  $\text{CDCl}_3$ )  $\delta$ :  
8.21-8.20 (m, 3H), 7.87 (t,  $J = 8.0$  Hz, 1H), 7.73 (d,  $J =$

8.5 Hz, 8H), 7.34 (d,  $J = 8.0$  Hz, 8H), 2.48 (s, 12H);  $^{13}\text{C}$  NMR (125 MHz,  $\text{CDCl}_3$ )  $\delta$ : 158.4, 146.4, 138.1, 134.3, 133.7, 131.3, 129.9, 129.6, 121.0, 69.9, 21.8; HRMS  $m/z$  (ESI) calcd for  $\text{C}_{38}\text{H}_{33}\text{N}_2\text{O}_8\text{S}_4$  ( $\text{M}+\text{H}$ ) $^+$  773.1114, found 773.1129.

**(1R,2S,5R)-2-isopropyl-5-methylcyclohexyl-4-(2,2-ditosyl-2H-azirin-3-yl)benzoate (3ra):**

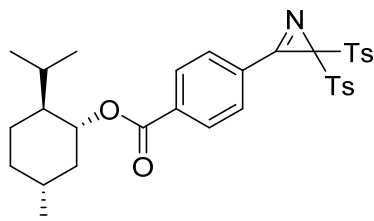

Colorless oil;  $^1\text{H}$  NMR (500 MHz,  $\text{CDCl}_3$ )  $\delta$ : 8.23 (d,  $J = 8.5$  Hz, 2H), 7.94 (d,  $J = 8.5$  Hz, 2H), 7.71 (d,  $J = 8.0$  Hz, 4H), 7.30 (d,  $J = 8.5$  Hz, 4H), 5.01-4.96 (m,

1H), 2.47 (s, 6H), 2.16-2.12 (m, 1H), 1.96-1.90 (m, 1H), 1.78-1.73 (m, 2H), 1.62-1.56 (m, 5H), 1.19-1.12 (m, 2H), 0.96-0.93 (m, 7H), 0.81 (d,  $J = 7.0$  Hz, 3H);  $^{13}\text{C}$  NMR (125 MHz,  $\text{CDCl}_3$ )  $\delta$ : 164.3, 158.8, 146.0, 137.0, 134.6, 134.5, 131.9, 130.5, 129.7,

129.5, 122.3, 76.1, 69.7, 47.1, 40.8, 34.1, 31.4, 26.6, 23.6, 22.0, 21.8, 20.7, 16.5;

HRMS  $m/z$  (ESI) calcd for  $C_{33}H_{38}NO_6S_2$  (M+H)<sup>+</sup> 608.2135, found 608.2142.

#### 4-(2,2-Ditosyl-2H-azirin-3-yl)benzyl-N-(tert-butoxycarbonyl)-N-methylglycinate

(3sa):

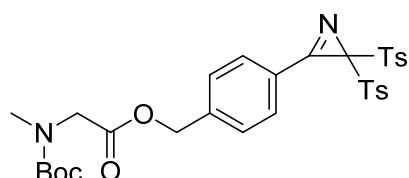

Yellow oil; <sup>1</sup>H NMR (500 MHz, CDCl<sub>3</sub>)  $\delta$ : 7.90 (d,  $J$  = 8.0 Hz, 1H), 7.87 (d,  $J$  = 8.0 Hz, 1H), 7.71 (d,  $J$  = 8.0 Hz, 2H), 7.69 (d,  $J$  = 8.0 Hz, 2H), 7.57 (t,  $J$  =

8.5 Hz, 2H), 7.29 (d,  $J$  = 8.0 Hz, 2H), 7.28 (d,  $J$  = 8.0 Hz, 2H), 5.29 (s, 1H), 5.28 (s, 1H), 4.08 (s, 1H), 4.00 (s, 1H), 2.97 (s, 1.33H), 2.96 (s, 1.67H), 2.47 (s, 6H), 1.49 (s, 5H), 1.40 (s, 4H); <sup>13</sup>C NMR (125 MHz, CDCl<sub>3</sub>)  $\delta$ : 169.6, 158.4, 156.1, 155.3, 145.9, 144.1, 143.9, 134.7, 134.6, 132.3, 132.3, 129.6, 129.5 (2C), 128.7, 128.6, 118.7, 118.5, 80.4, 69.7, 65.4, 51.0, 50.4, 35.7, 35.6, 28.3, 28.2, 21.8; HRMS  $m/z$  (ESI) calcd for  $C_{31}H_{35}N_2O_8S_2$  (M+H)<sup>+</sup> 627.1829, found 627.1837.

#### 1-(tert-Butyl)-2-(4-(2,2-ditosyl-2H-azirin-3-yl)benzyl)-(S)-pyrrolidine-1,2-dicarboxylate (3ta):

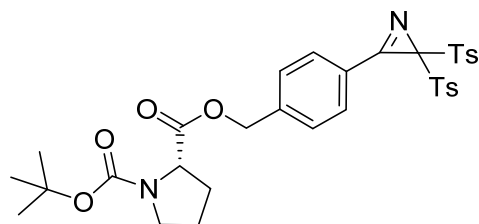

Yellow oil; <sup>1</sup>H NMR (500 MHz, CDCl<sub>3</sub>)  $\delta$ : 7.90 (d,  $J$  = 7.5 Hz, 1H), 7.85 (d,  $J$  = 8.5 Hz, 1H), 7.71 (d,  $J$  = 8.5 Hz, 2H), 7.69 (d,  $J$  = 8.5

Hz, 2H), 7.59 (d,  $J$  = 6.0 Hz, 1H), 7.57 (d,  $J$  = 5.5 Hz, 1H), 7.30 (d,  $J$  = 8.0 Hz, 2H), 7.29 (d,  $J$  = 8.0 Hz, 2H), 5.36-5.21 (m, 2H), 4.43 (dd,  $J$  = 9.0 Hz, 0.5H), 4.33 (dd,  $J$  = 9.0 Hz, 0.5H), 3.61-3.40 (m, 2H), 2.47 (s, 6H), 2.34-2.21 (m, 1H), 2.02-1.88 (m, 3H), 1.48 (s, 4H), 1.37 (s, 5H); <sup>13</sup>C NMR (125 MHz, CDCl<sub>3</sub>)  $\delta$ : 172.8, 172.6, 158.4, 154.4,



153.6, 145.8 (2C), 144.5, 144.1, 134.7, 134.6(2C), 132.4, 132.2, 129.6, 129.5 (2C), 128.7, 128.4, 118.7, 118.3, 80.1, 80.0, 69.72, 65.4, 65.3, 59.0, 58.8, 46.6, 46.3, 30.9, 29.9, 28.4, 28.3, 24.4, 23.6, 21.8; HRMS  $m/z$  (ESI) calcd for  $C_{33}H_{37}N_2O_8S_2$  (M+H)<sup>+</sup> 653.1986, found 653.1998.

**4-(2,2-Ditosyl-2H-azirin-3-yl)benzyl-2-((3*r*,5*r*,7*r*)-adamantan-1-yl)acetate (3ua):**

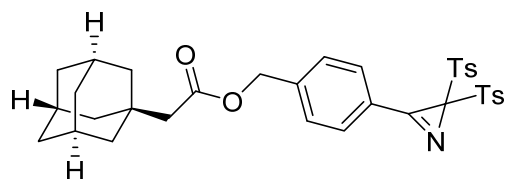

White solid; <sup>1</sup>H NMR (500 MHz, CDCl<sub>3</sub>)

$\delta$ : 7.88 (d,  $J = 8.5$  Hz, 2H), 7.71 (d,  $J = 8.5$  Hz, 4H), 7.57 (d,  $J = 8.0$  Hz, 2H), 7.29 (d,  $J = 8.0$  Hz, 4H), 7.57 (t,  $J = 8.5$  Hz, 2H), 5.21 (s, 2H), 2.47 (s, 6H), 2.19 (s, 2H), 1.99 (t,  $J = 3.5$  Hz, 3H), 1.73 (s, 1H), 1.70 (s, 2H), 1.65 (t,  $J = 2.5$  Hz, 5H), 1.62 (s, 2H); <sup>13</sup>C

NMR (125 MHz, CDCl<sub>3</sub>)  $\delta$ : 171.3, 158.4, 145.8, 144.8, 134.7, 132.3, 129.6 (2C), 128.6, 118.3, 69.8, 64.7, 48.7, 42.4, 36.6, 32.9, 28.5, 21.8; HRMS  $m/z$  (ESI) calcd for  $C_{35}H_{38}NO_6S_2$  (M+H)<sup>+</sup> 632.2135, found 632.2147.

**4-(2,2-Ditosyl-2H-azirin-3-yl)benzyl-(8*S*,9*S*,10*R*,13*S*,14*S*)-10,13-dimethyl-3-oxo-2,3,6,7,8,9,10,11,12,13,14,15,16,17-tetradecahydro-1*H*-cyclopenta[*a*]phenanthrene-17-carboxylate (3va):**

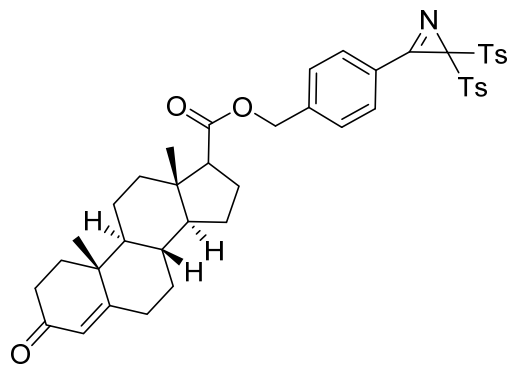

Yellow solid; <sup>1</sup>H NMR (500 MHz, CDCl<sub>3</sub>)  $\delta$ : 7.90 (d,  $J = 8.5$  Hz, 2H), 7.68 (d,  $J = 8.5$  Hz, 4H), 7.58 (d,  $J = 8.0$  Hz, 2H), 7.28 (d,  $J = 8.0$  Hz, 4H), 5.73 (s, 1H), 5.27-5.19 (m, 2H), 2.47 (s, 6H), 2.42-2.35 (m, 3H), 2.34-2.26 (m, 2H), 2.21-2.17 (m, 1H), 2.06-2.01 (m, 2H), 1.90-1.86 (m, 3H),

1.74-1.71 (m, 3H), 1.65-1.55 (m, 3H), 1.44-1.41 (m, 1H), 1.19 (s, 3H), 1.09-1.05(m, 1H), 1.01-0.95 (m, 1H), 0.72 (s, 3H);  $^{13}\text{C}$  NMR (125 MHz,  $\text{CDCl}_3$ )  $\delta$ : 199.5, 173.4, 171.0, 158.4, 145.8, 144.8, 134.6, 134.6, 132.3, 129.6, 129.5, 128.7, 123.9, 118.4, 69.7, 64.9, 55.3, 55.0, 53.6, 44.1, 38.6, 38.1, 35.6 (2C), 33.9, 32.7, 31.8, 24.4, 23.6, 21.8, 20.9, 17.3, 13.5; HRMS  $m/z$  (ESI) calcd for  $\text{C}_{43}\text{H}_{48}\text{NO}_7\text{S}_2$  ( $\text{M}+\text{H}$ ) $^+$  754.2867, found 754.2885.

**(8*S*,9*S*,13*S*,14*S*)-3-(2,2-ditosyl-2*H*-azirin-3-yl)-6,7,8,9,11,12,13,14,15,16-decahydro-17*H*-cyclopenta[*a*]phenanthren-17-one (3wa):**

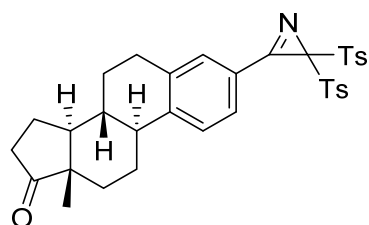

White solid;  $^1\text{H}$  NMR (500 MHz,  $\text{CDCl}_3$ )  $\delta$ : 7.71 (d,  $J = 8.5$  Hz, 4H), 7.67 (d,  $J = 7.0$  Hz, 1H), 7.52 (s, 1H), 7.51 (d,  $J = 8.5$  Hz, 1H), 7.29 (d,  $J = 8.0$  Hz, 4H), 2.95-2.92 (m, 2H), 2.57-2.51 (m, 1H), 2.47 (s, 6H), 2.42-2.37 (m, 1H), 2.20-2.14 (m, 1H), 2.11-2.06 (m, 2H), 2.03-2.00 (m, 1H), 1.71-1.68 (m, 1H), 1.61-1.47 (m, 6H), 0.94 (s, 3H);  $^{13}\text{C}$  NMR (125 MHz,  $\text{CDCl}_3$ )  $\delta$ : 158.2, 149.1, 145.7, 138.5, 134.9, 132.7, 129.6, 129.5, 129.3, 126.8, 116.0, 69.7, 50.4, 47.8, 44.9, 37.5, 35.8, 31.4, 29.0, 25.9, 25.4, 21.8, 21.5, 13.8; HRMS  $m/z$  (ESI) calcd for  $\text{C}_{34}\text{H}_{36}\text{NO}_5\text{S}_2$  ( $\text{M}+\text{H}$ ) $^+$  602.2029, found 602.2042.

**2,2-Bis(phenylsulfonyl)-3-(*p*-tolyl)-2*H*-azirine (3cb):**

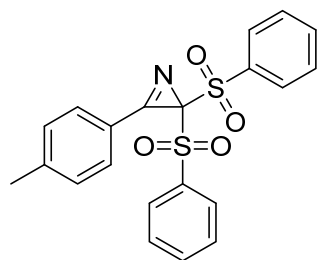

White solid;  $^1\text{H}$  NMR (500 MHz,  $\text{CDCl}_3$ )  $\delta$ : 7.84 (d,  $J = 7.0$  Hz, 4H), 7.74 (d,  $J = 8.5$  Hz, 2H), 7.68 (t,  $J = 7.5$  Hz, 2H), 7.50 (t,  $J = 8.0$  Hz, 4H), 7.39 (d,  $J = 8.0$  Hz, 2H);  $^{13}\text{C}$  NMR (125 MHz,  $\text{CDCl}_3$ )  $\delta$ : 158.0, 147.8, 137.8, 134.5,

132.2, 130.5, 129.5, 129.0, 115.7, 69.6, 22.3; HRMS  $m/z$  (ESI) calcd for  $C_{21}H_{18}NO_4S_2$  (M+H)<sup>+</sup> 412.0672, found 412.0685.

**2,2-Bis((4-chlorophenyl)sulfonyl)-3-(*p*-tolyl)-2*H*-azirine (3cc):**

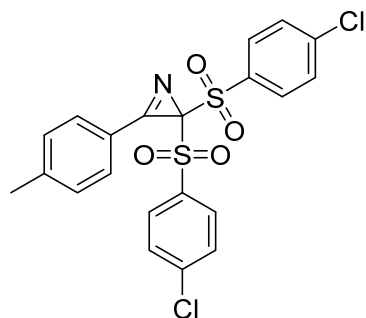

Yellow solid; <sup>1</sup>H NMR (500 MHz, CDCl<sub>3</sub>)  $\delta$ : 7.79 (d,  $J$  = 8.5 Hz, 4H), 7.73 (d,  $J$  = 8.0 Hz, 2H), 7.50 (d,  $J$  = 8.5 Hz, 4H), 7.42 (d,  $J$  = 7.5 Hz, 2H), 2.51 (s, 3H); <sup>13</sup>C NMR (125 MHz, CDCl<sub>3</sub>)  $\delta$ : 157.9, 148.2, 141.7,

136.2, 132.2, 131.0, 130.6, 129.4, 115.4, 69.6, 22.3; HRMS  $m/z$  (ESI) calcd for  $C_{21}H_{16}^{35}Cl_2NO_4S_2$  (M+H)<sup>+</sup> 479.9892, found 479.9901.

**4,4'-(3-(*p*-Tolyl)-2*H*-azirine-2,2-disulfonyl)dibenzonitrile (3cd):**

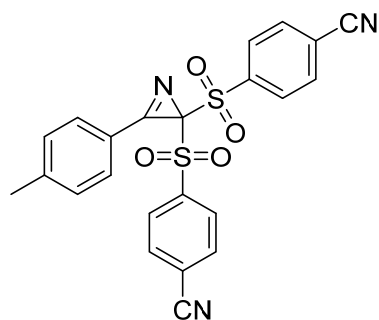

Yellow solid; <sup>1</sup>H NMR (500 MHz, CDCl<sub>3</sub>)  $\delta$ : 8.06 (d,  $J$  = 8.0 Hz, 4H), 7.87 (d,  $J$  = 8.0 Hz, 4H), 7.63 (d,  $J$  = 8.0 Hz, 2H), 7.42 (d,  $J$  = 7.5 Hz, 2H), 2.53 (s, 3H); <sup>13</sup>C NMR (125 MHz, CDCl<sub>3</sub>)  $\delta$ : 157.6, 148.9, 141.9,

132.8, 132.2, 130.8, 130.3, 118.5, 116.9, 114.7, 69.5, 22.4; HRMS  $m/z$  (ESI) calcd for  $C_{23}H_{16}N_3O_4S_2$  (M+H)<sup>+</sup> 462.0577, found 462.0585.

**3-(*p*-Tolyl)-2,2-bis(*m*-tolylsulfonyl)-2*H*-azirine (3ce):**

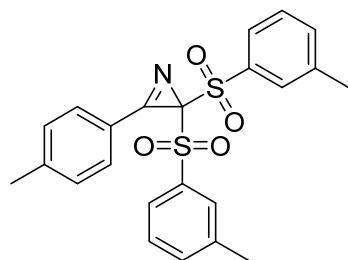

Yellow solid; <sup>1</sup>H NMR (500 MHz, CDCl<sub>3</sub>)  $\delta$ : 7.79 (d,  $J$  = 8.0 Hz, 2H), 7.63 (d,  $J$  = 8.5 Hz, 2H), 7.55 (s, 2H), 7.45 (d,  $J$  = 7.5 Hz, 2H), 7.40 (d,  $J$  = 8.5 Hz, 2H), 7.37 (t,  $J$  = 8.0 Hz, 2H), 2.49 (s, 3H), 2.36 (s, 6H); <sup>13</sup>C NMR

(125 MHz, CDCl<sub>3</sub>)  $\delta$ : 158.0, 147.6, 139.2, 137.6, 135.3, 132.3, 130.4, 129.5, 128.7,

126.7, 115.8, 69.7, 22.2, 21.2; HRMS  $m/z$  (ESI) calcd for  $C_{23}H_{22}NO_4S_2$  ( $M+H$ )<sup>+</sup> 440.0985, found 440.0993.

**2,2-Bis(naphthalen-2-ylsulfonyl)-3-(*p*-tolyl)-2*H*-azirine (3cf):**

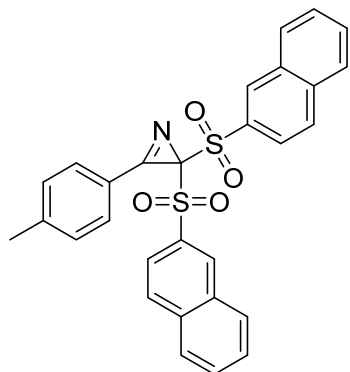

Yellow solid; <sup>1</sup>H NMR (500 MHz, CDCl<sub>3</sub>)  $\delta$ : 8.25 (s, 2H), 7.89 (d,  $J$  = 8.0 Hz, 2H), 7.78 (d,  $J$  = 8.5 Hz, 2H), 7.72-7.69 (m, 4H), 7.67 (d,  $J$  = 9.0 Hz, 2H), 7.62 (t,  $J$  = 7.0 Hz, 2H), 7.39 (d,  $J$  = 7.5 Hz, 2H), 2.49 (s, 3H); <sup>13</sup>C NMR (125 MHz, CDCl<sub>3</sub>)  $\delta$ : 158.1, 147.8, 135.5, 134.4,

132.4, 131.7, 131.5, 130.5, 129.5, 129.4, 128.9, 127.8, 127.5, 123.5, 116.0, 69.8, 22.2; HRMS  $m/z$  (ESI) calcd for  $C_{29}H_{22}NO_4S_2$  ( $M+H$ )<sup>+</sup> 512.0985, found 512.0999.

**2,2-Bis(thiophen-3-ylsulfonyl)-3-(*p*-tolyl)-2*H*-azirine (3cg):**

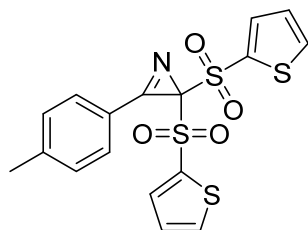

Yellow solid; <sup>1</sup>H NMR (500 MHz, CDCl<sub>3</sub>)  $\delta$ : 7.80-7.77 (m, 5H), 7.76 (s, 1H), 7.40 (d,  $J$  = 8.0 Hz, 2H), 7.18 (d,  $J$  = 4 Hz, 1H), 7.17 (d,  $J$  = 4 Hz, 1H), 2.49 (s, 3H); <sup>13</sup>C NMR (125

MHz, CDCl<sub>3</sub>)  $\delta$ : 157.9, 147.9, 137.7, 136.9, 136.0, 132.3, 130.5, 128.0, 115.5, 70.4, 22.3; HRMS  $m/z$  (ESI) calcd for  $C_{17}H_{14}NO_4S_4$  ( $M+H$ )<sup>+</sup> 423.9800, found 423.9815.

**2,2-Bis(methylsulfonyl)-3-(*p*-tolyl)-2*H*-azirine (3ch):**

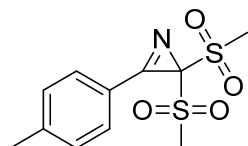

Red solid; <sup>1</sup>H NMR (500 MHz, CDCl<sub>3</sub>)  $\delta$ : 7.88 (d,  $J$  = 8.0 Hz, 2H), 7.47 (d,  $J$  = 8.0 Hz, 2H), 3.35 (s, 6H), 2.51 (s, 3H); <sup>13</sup>C NMR (125 MHz, CDCl<sub>3</sub>)  $\delta$ : 157.5, 148.3, 131.9, 130.8, 115.5,

66.5, 42.1, 22.3; HRMS  $m/z$  (ESI) calcd for  $C_{11}H_{14}NO_4S_2$  ( $M+H$ )<sup>+</sup> 288.0359, found 288.0366.

**2,2-Bis(cyclopropylsulfonyl)-3-(*p*-tolyl)-2*H*-azirine (3ci):**

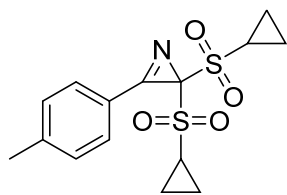

Red solid;  $^1\text{H}$  NMR (500 MHz,  $\text{CDCl}_3$ )  $\delta$ : 7.91 (d,  $J = 8.5$  Hz, 2H), 7.45 (d,  $J = 8.0$  Hz, 2H), 3.19-3.14 (m, 2H), 2.51 (s, 3H), 1.42-1.36 (m, 2H), 1.22-1.17 (m, 2H), 1.14-1.08 (m, 8H);  $^{13}\text{C}$  NMR (125 MHz,  $\text{CDCl}_3$ )  $\delta$ : 158.2, 147.7, 131.9, 130.5, 116.3, 67.5, 31.0, 22.2, 5.8, 5.3; HRMS  $m/z$  (ESI) calcd for  $\text{C}_{15}\text{H}_{18}\text{NO}_4\text{S}_2$  ( $\text{M}+\text{H}$ ) $^+$  340.0672, found 340.0675.

**Dimethyl 3,3'-(3-(*p*-tolyl)-2*H*-azirine-2,2-disulfonyl)dipropionate (3cj):**

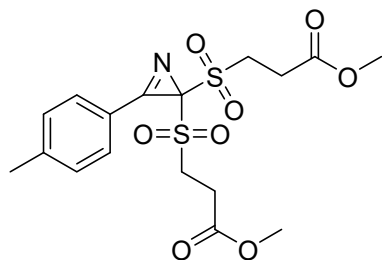

Yellow oil;  $^1\text{H}$  NMR (500 MHz,  $\text{CDCl}_3$ )  $\delta$ : 7.90 (d,  $J = 8.0$  Hz, 2H), 7.48 (d,  $J = 7.5$  Hz, 2H), 4.06-4.00 (m, 2H), 3.73 (s, 6H), 3.72-3.67 (m, 2H), 2.96-2.91 (m, 4H), 2.52 (s, 3H);  $^{13}\text{C}$  NMR (125 MHz,  $\text{CDCl}_3$ )  $\delta$ : 170.1, 157.2, 148.4, 132.0, 130.9, 115.4, 66.4, 52.5, 50.3, 26.3, 22.3; HRMS  $m/z$  (ESI) calcd for  $\text{C}_{17}\text{H}_{22}\text{NO}_8\text{S}_2$  ( $\text{M}+\text{H}$ ) $^+$  432.0781, found 432.0796.

**2-(Methylsulfonyl)-3-(*p*-tolyl)-2-tosyl-2*H*-azirine (3cah):**

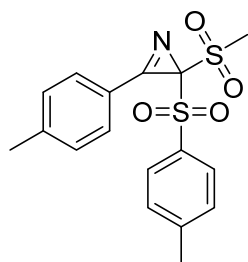

Yellow solid;  $^1\text{H}$  NMR (500 MHz,  $\text{CDCl}_3$ )  $\delta$ : 7.84 (d,  $J = 8.5$  Hz, 2H), 7.71 (d,  $J = 8.0$  Hz, 2H), 7.39 (d,  $J = 8.0$  Hz, 2H), 7.36 (d,  $J = 8.0$  Hz, 2H), 3.26 (s, 3H), 2.49 (s, 3H), 2.48 (s, 3H);  $^{13}\text{C}$  NMR (125 MHz,  $\text{CDCl}_3$ )  $\delta$ : 157.8, 147.9, 146.2, 135.0, 132.1, 130.5, 129.8, 129.8, 115.7, 68.2, 41.3, 22.3, 21.8; HRMS  $m/z$  (ESI) calcd for  $\text{C}_{17}\text{H}_{18}\text{NO}_4\text{S}_2$  ( $\text{M}+\text{H}$ ) $^+$  364.0672, found 364.0685.

**2,6-Di-*tert*-butyl-4-(tosylmethyl)phenol (4):**

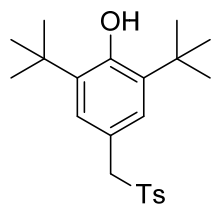

White solid;  $^1\text{H}$  NMR (500 MHz,  $\text{CDCl}_3$ )  $\delta$ : 7.44 (d,  $J = 8.5$  Hz, 2H), 7.21 (d,  $J = 7.5$  Hz, 2H), 7.39 (d,  $J = 8.0$  Hz, 2H), 6.73 (s, 2H), 5.25 (s, 1H), 4.19 (s, 2H), 2.41 (s, 3H), 1.32 (s, 18H);  $^{13}\text{C}$  NMR (125 MHz,  $\text{CDCl}_3$ )  $\delta$ : 154.1, 144.3, 135.9, 134.8, 129.3, 128.9, 127.6, 118.9, 63.2, 34.1, 30.0, 21.5; HRMS  $m/z$  (ESI) calcd for  $\text{C}_{22}\text{H}_{31}\text{O}_3\text{S}$  ( $\text{M}+\text{H}$ ) $^+$  375.1988, found 375.1997.

### (C) Spectra

#### 3-(4-Bromophenyl)-2,2-ditosyl-2H-azirine (3aa):

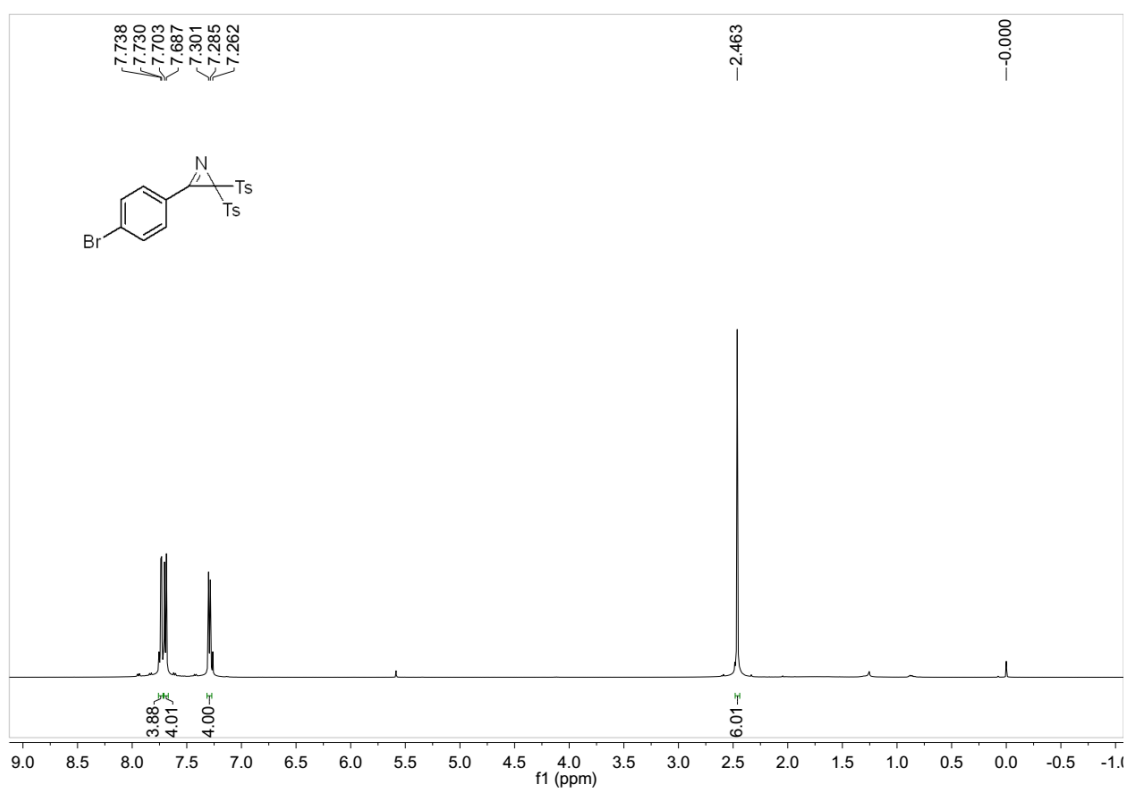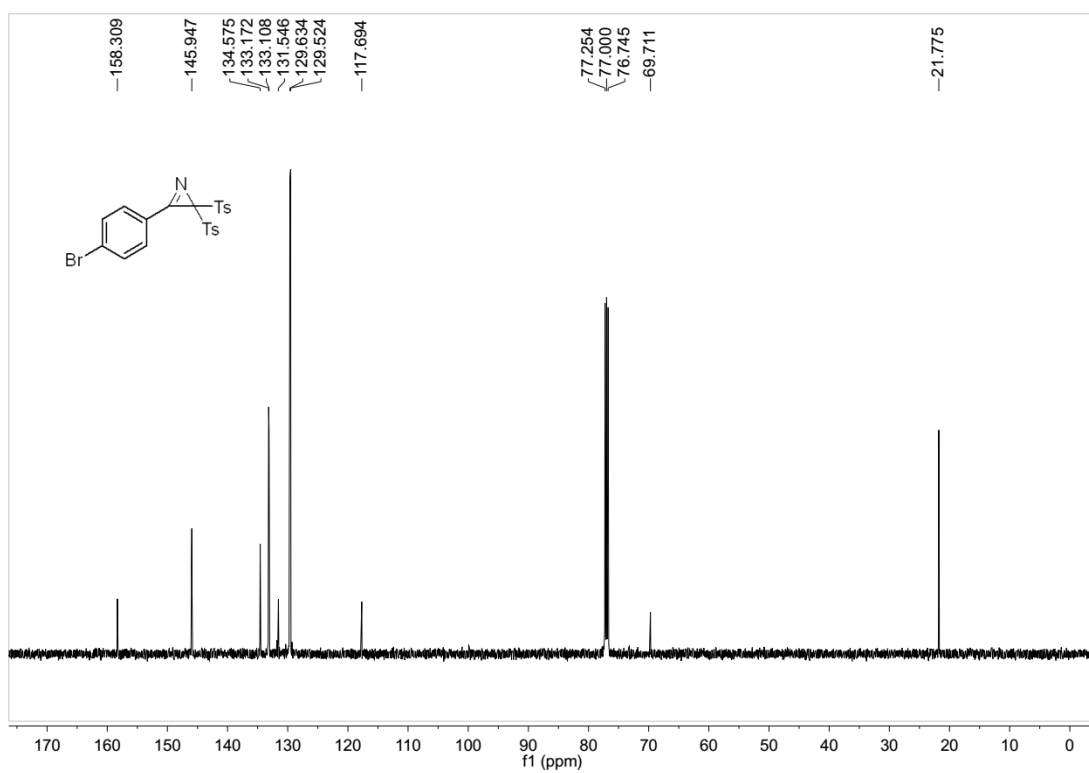

### 3-Phenyl-2,2-ditosyl-2H-azirine (3ba):

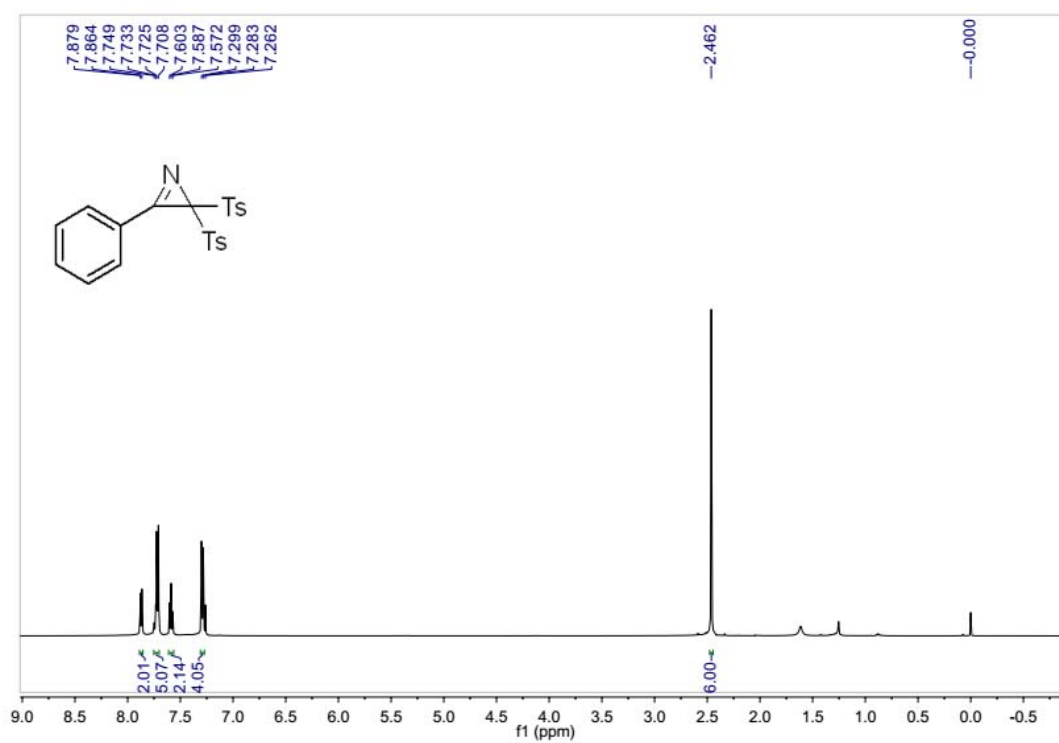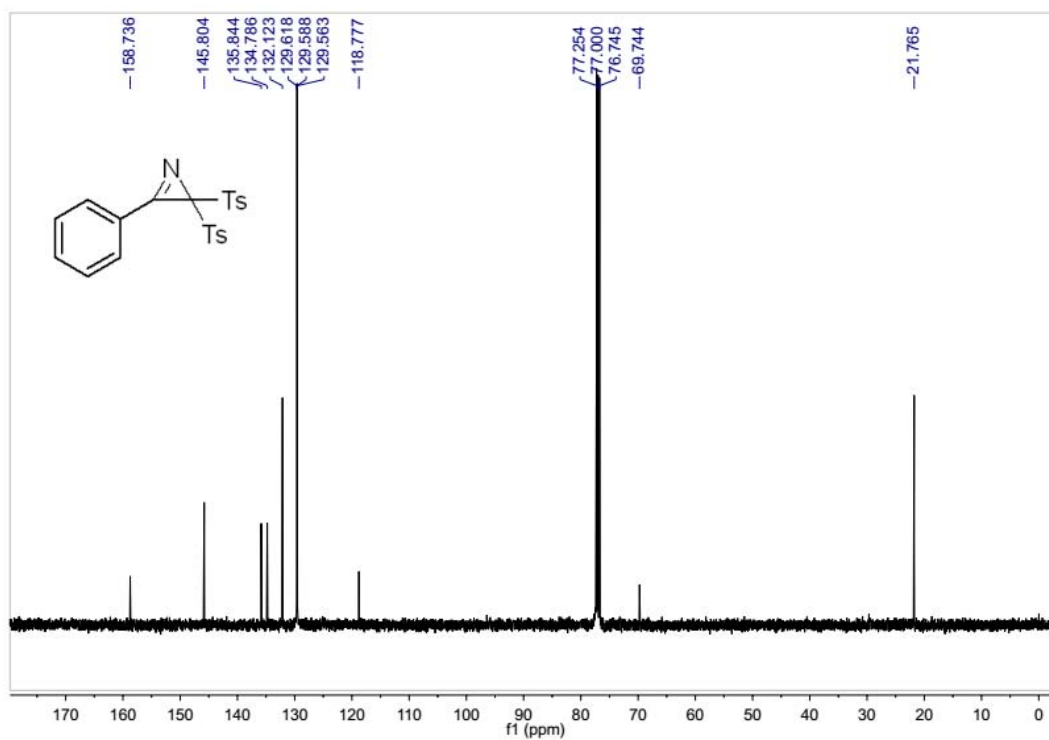



**3-(*p*-Tolyl)-2,2-ditosyl-2*H*-azirine (3ca):**

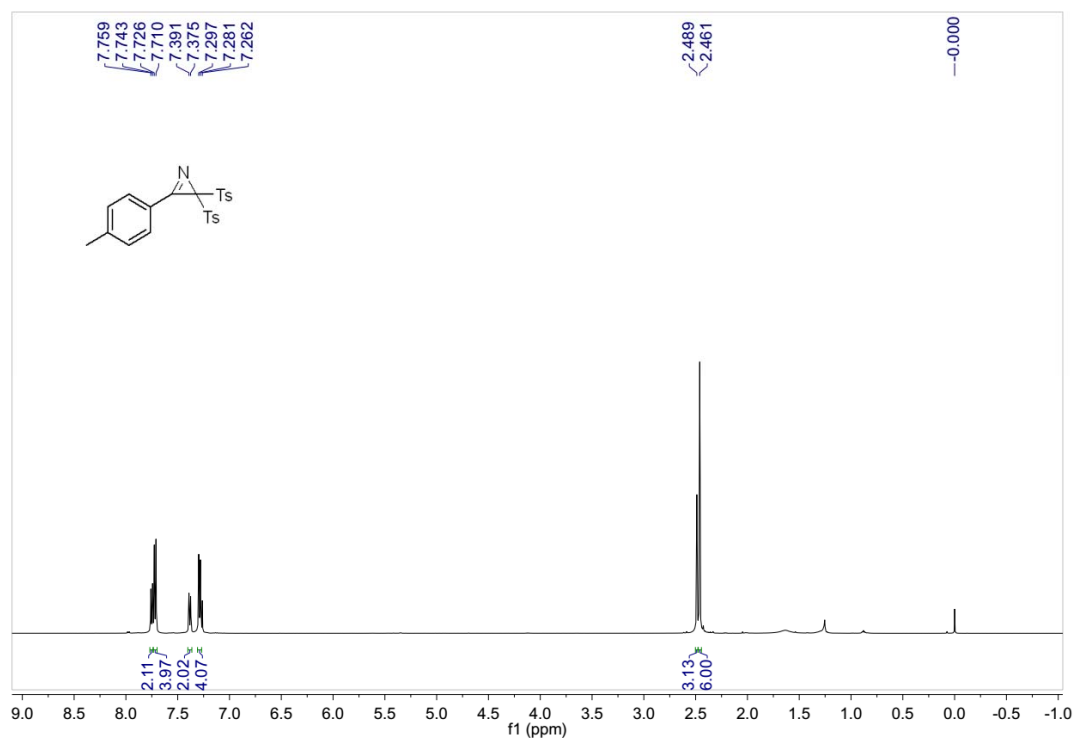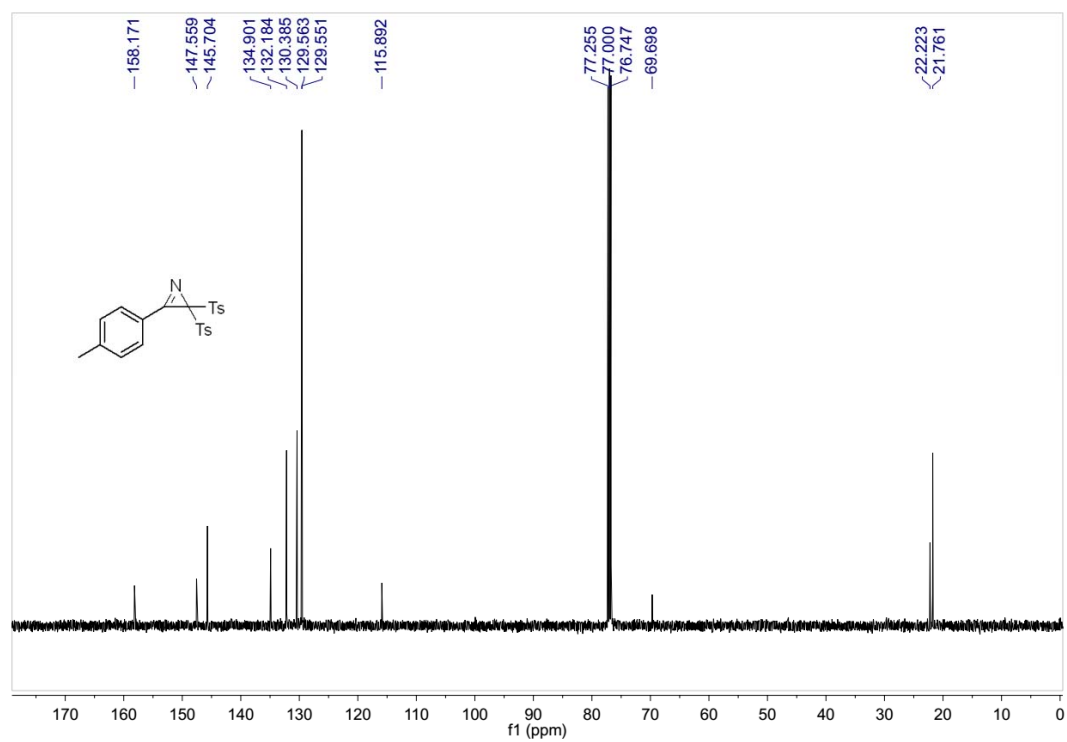

### 3-(4-Methoxyphenyl)-2,2-ditosyl-2H-azirine (3da):

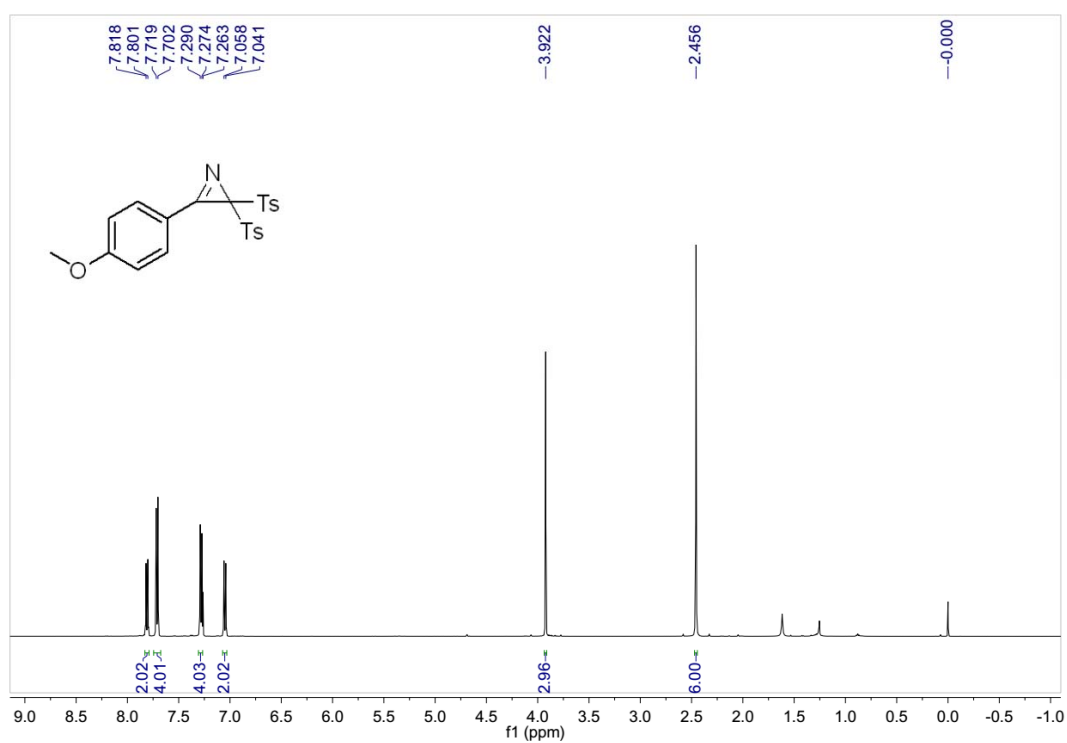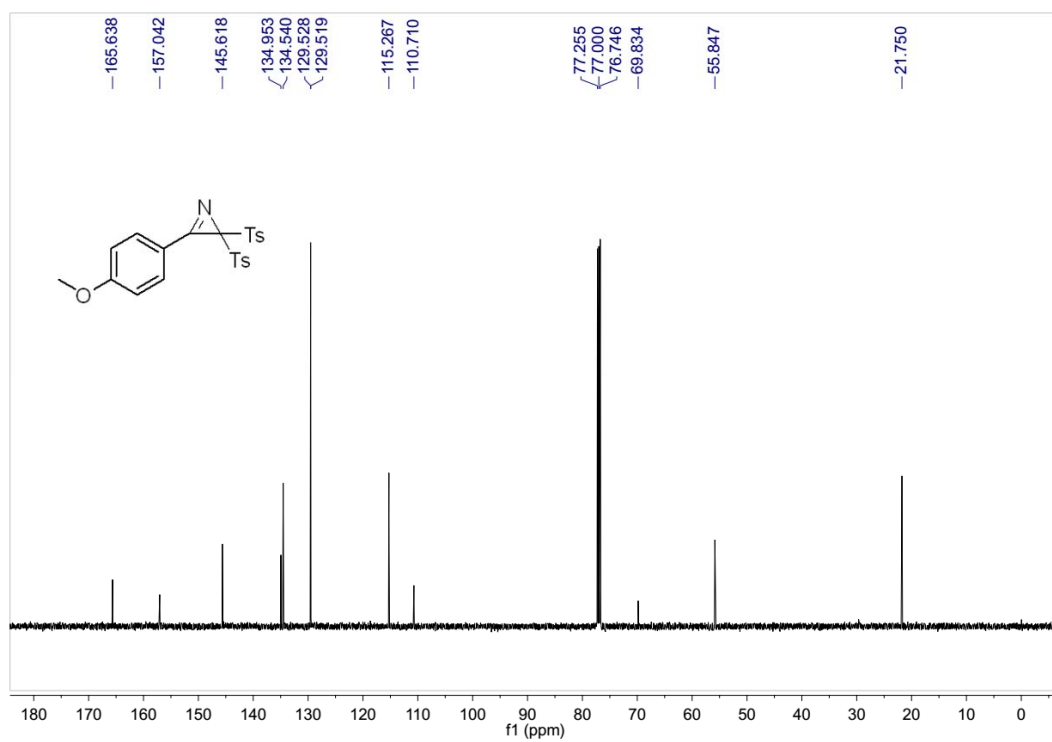

### 3-(4-Chlorophenyl)-2,2-ditosyl-2H-azirine (3ea):

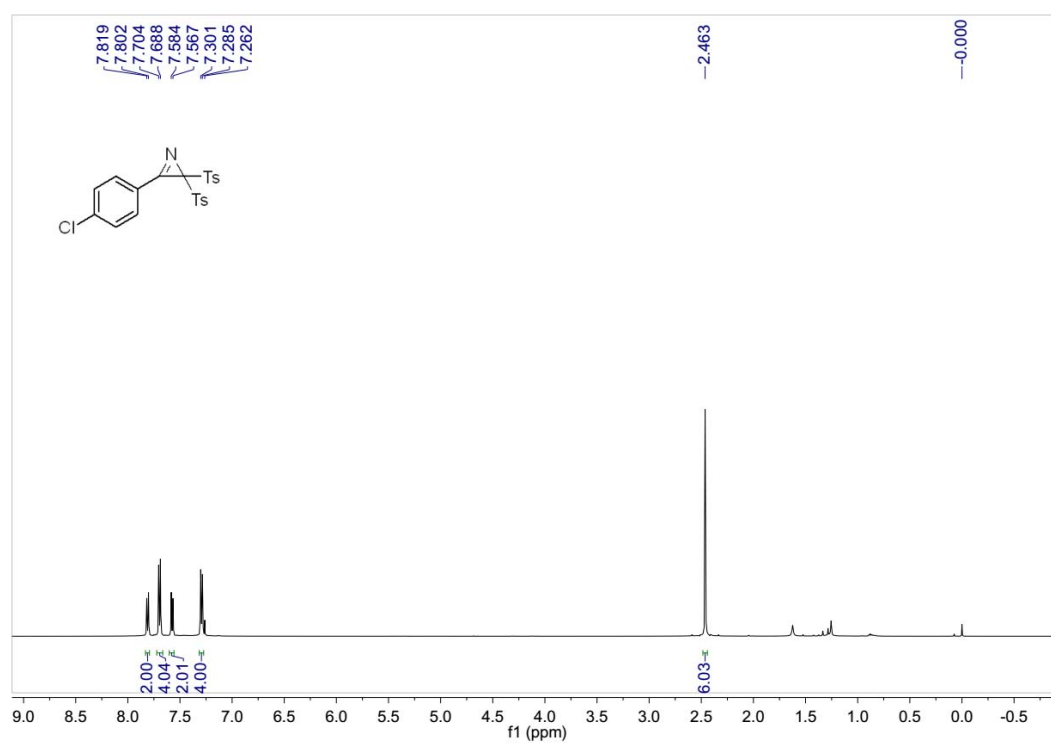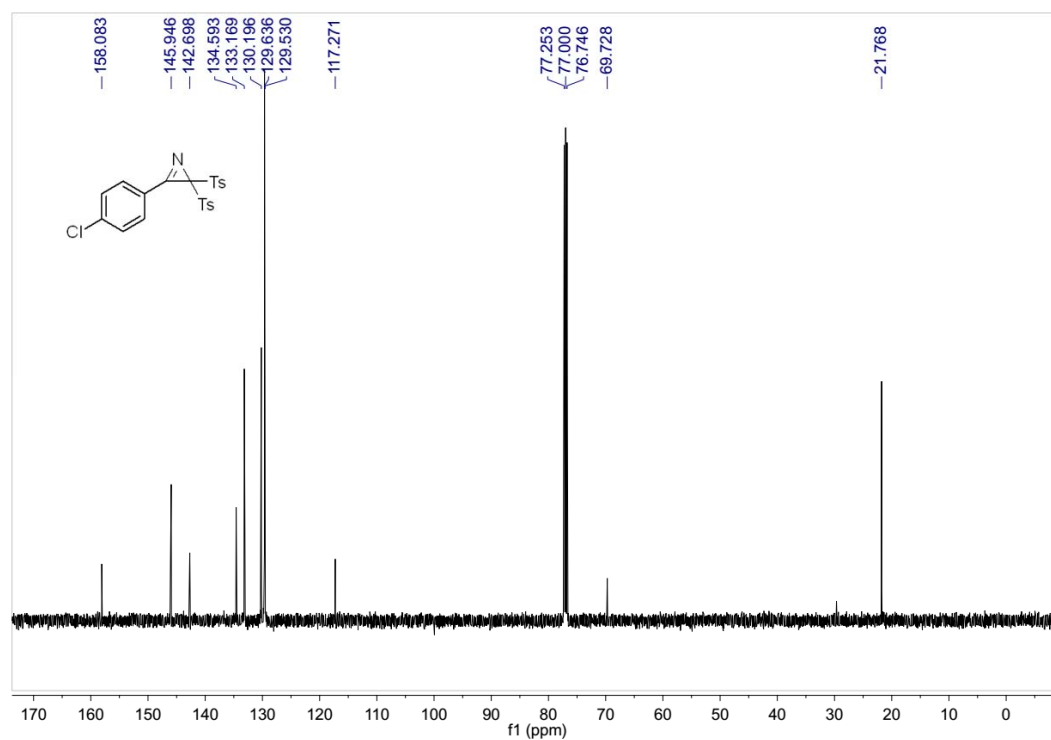

### 4-(2,2-Ditosyl-2H-azirin-3-yl)benzonitrile (3fa):

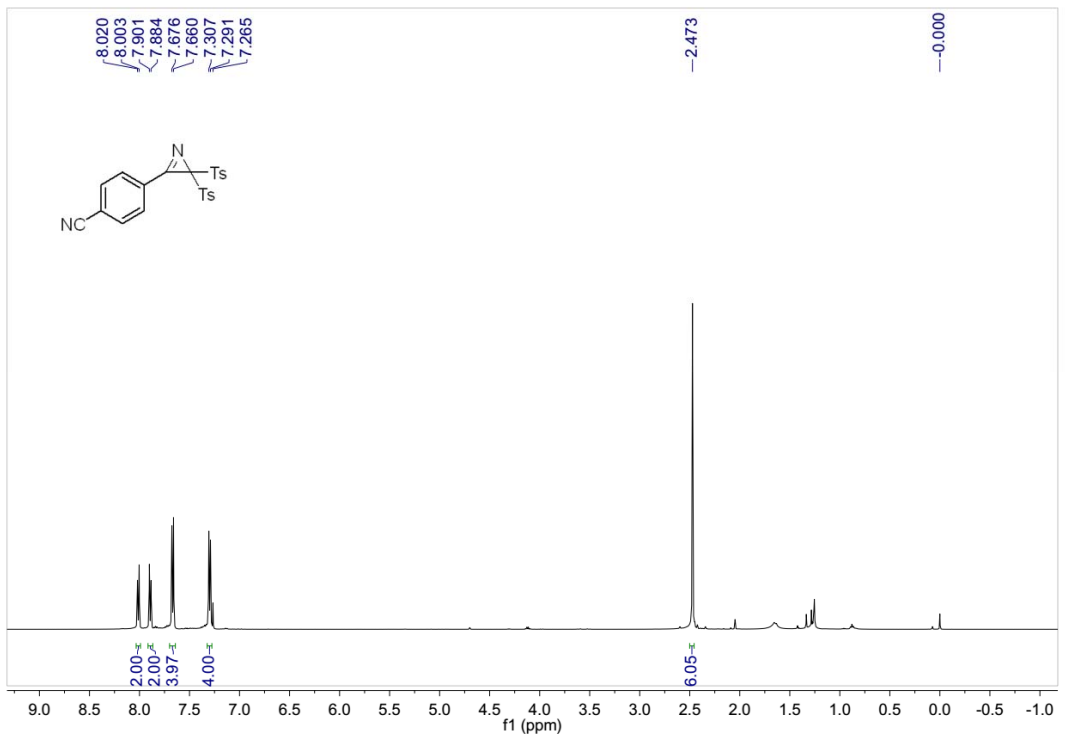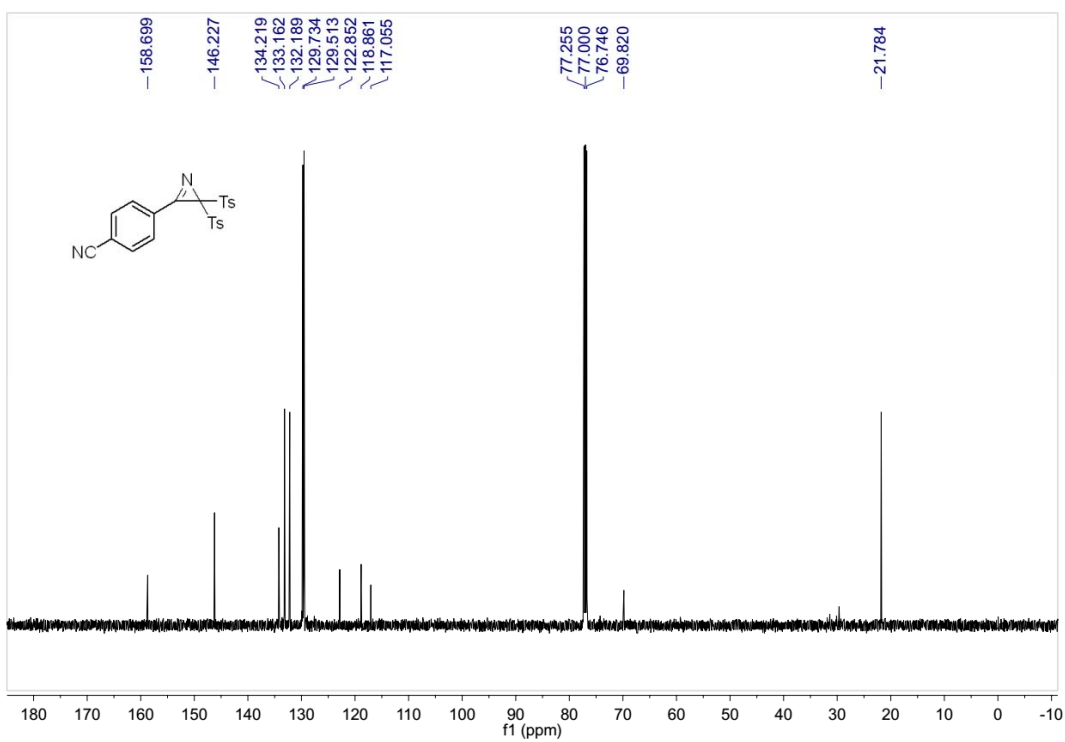

### 3-(4-Nitrophenyl)-2,2-ditosyl-2H-azirine (3ga):

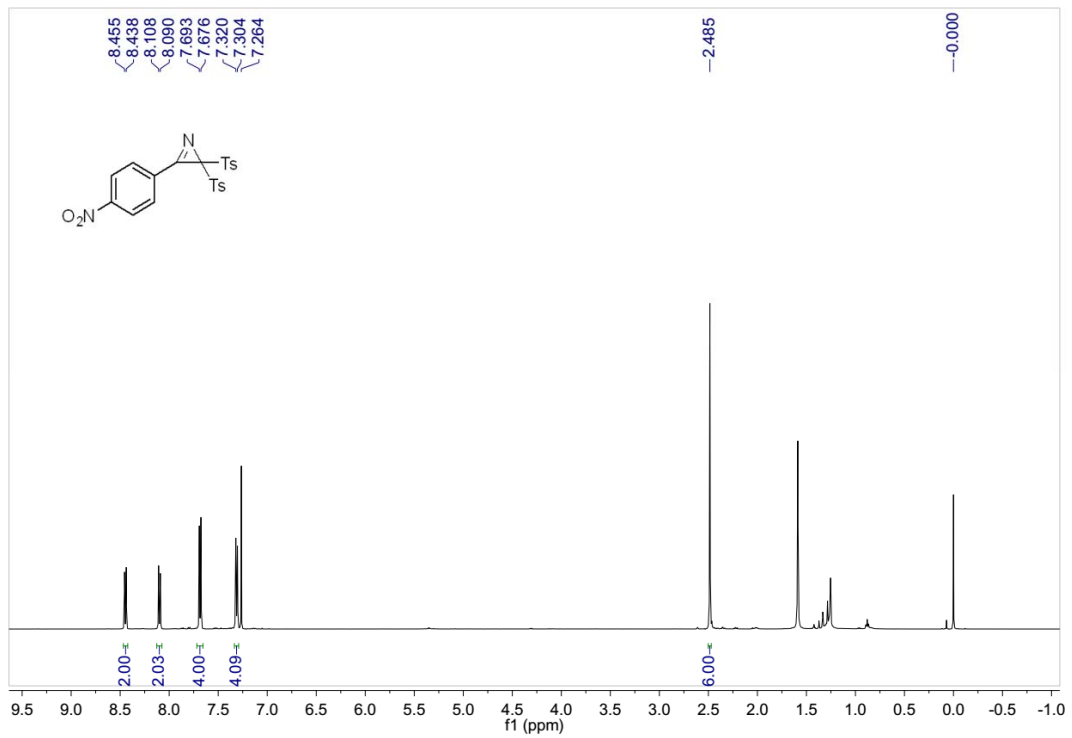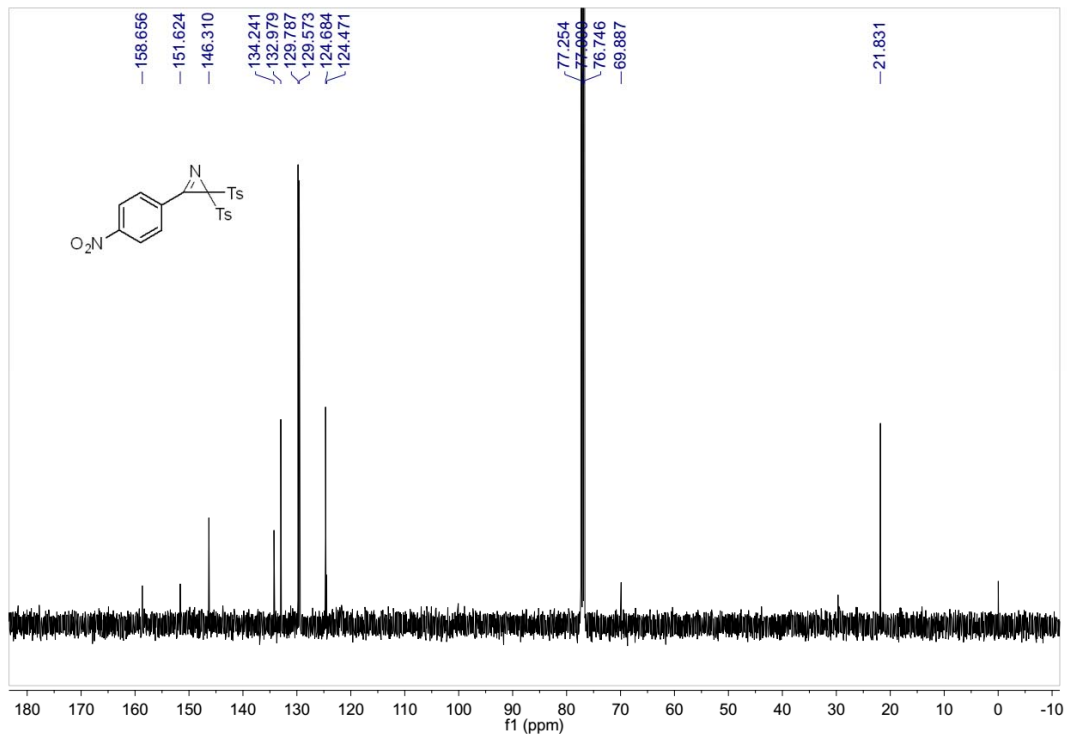

**3-(*m*-Tolyl)-2,2-ditosyl-2*H*-azirine (3ha):**

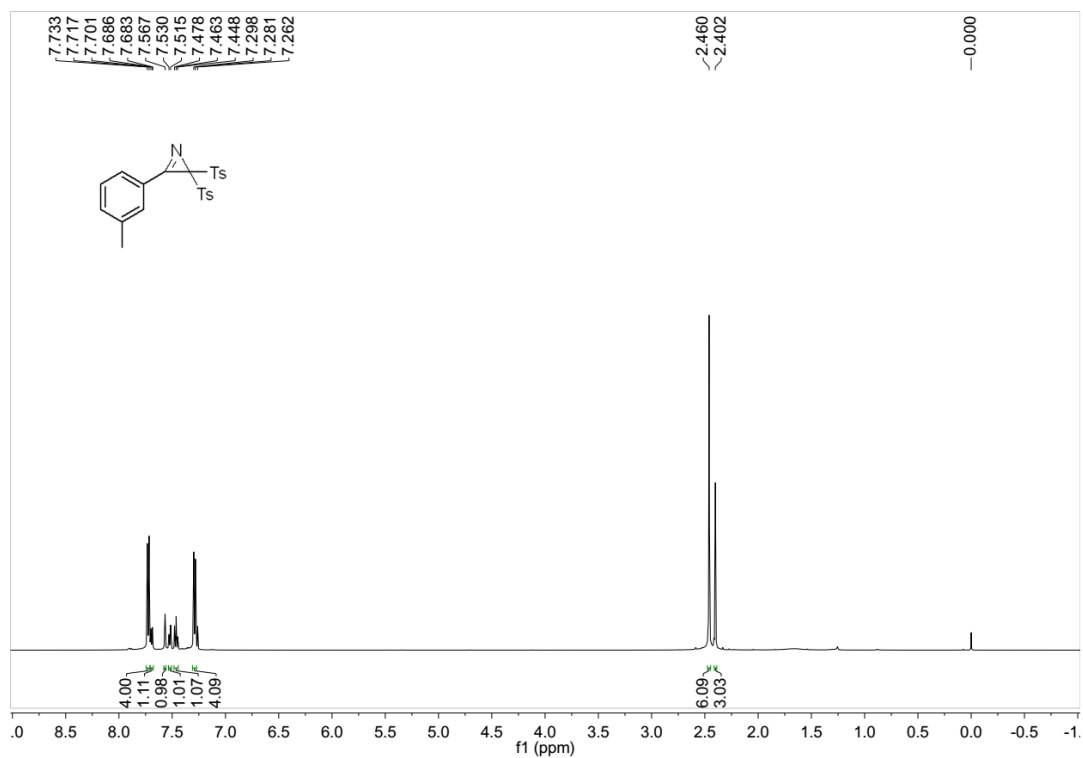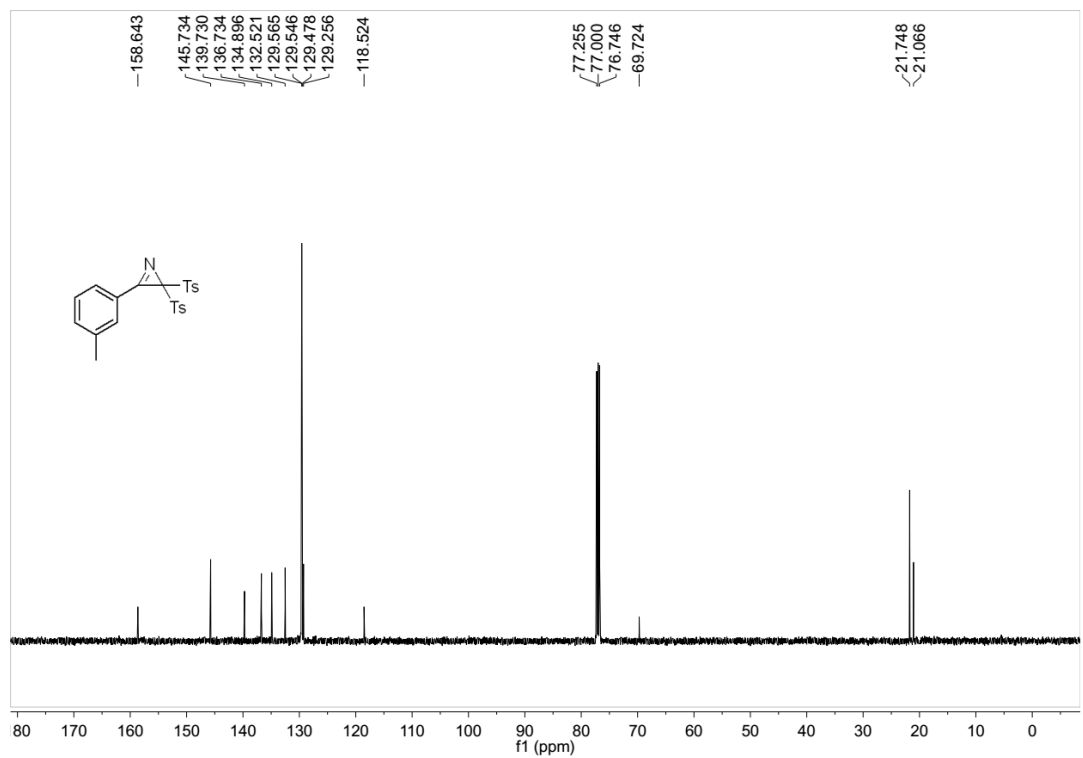

### 3-(*o*-Tolyl)-2,2-ditosyl-2H-azirine (3ia):

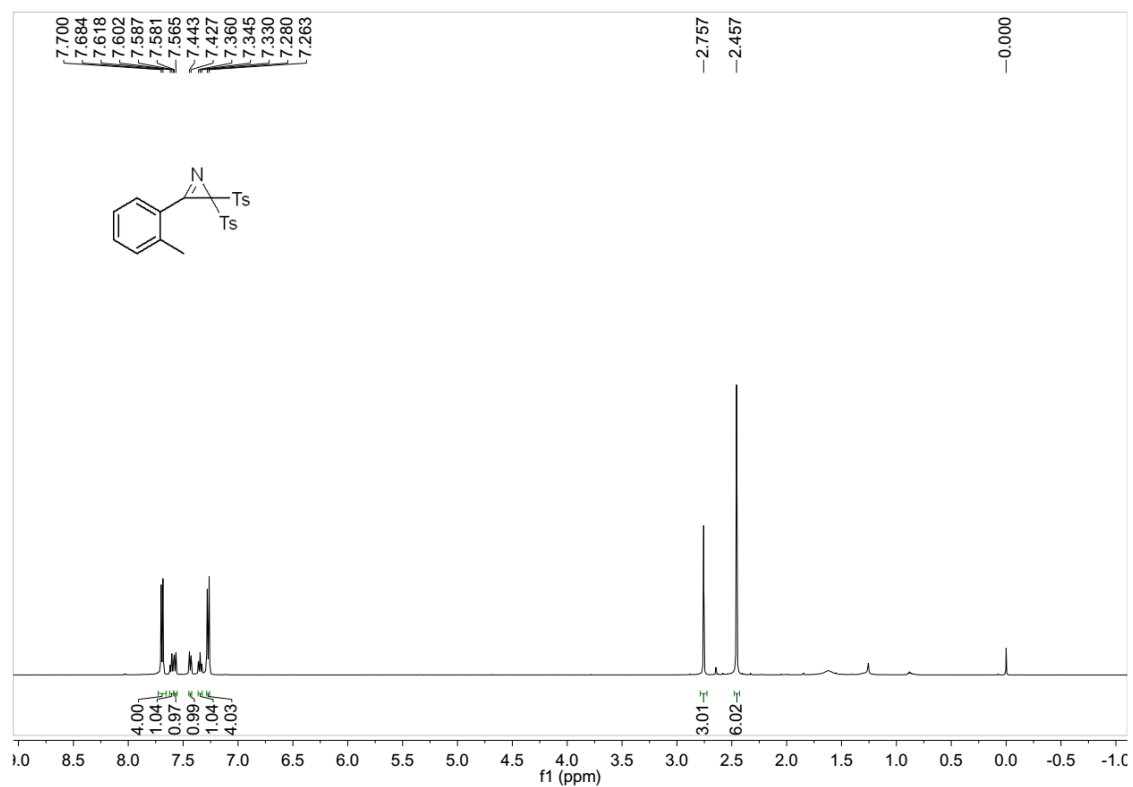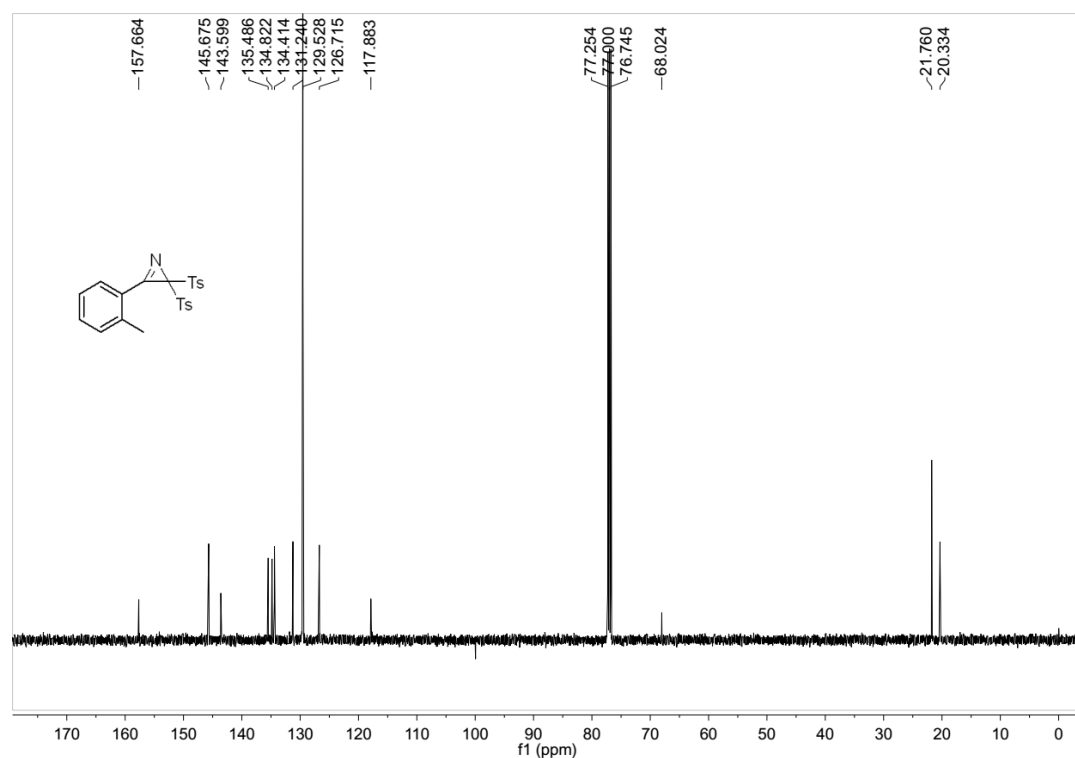

3-(Naphthalen-2-yl)-2,2-ditosyl-2H-azirine (3ja):

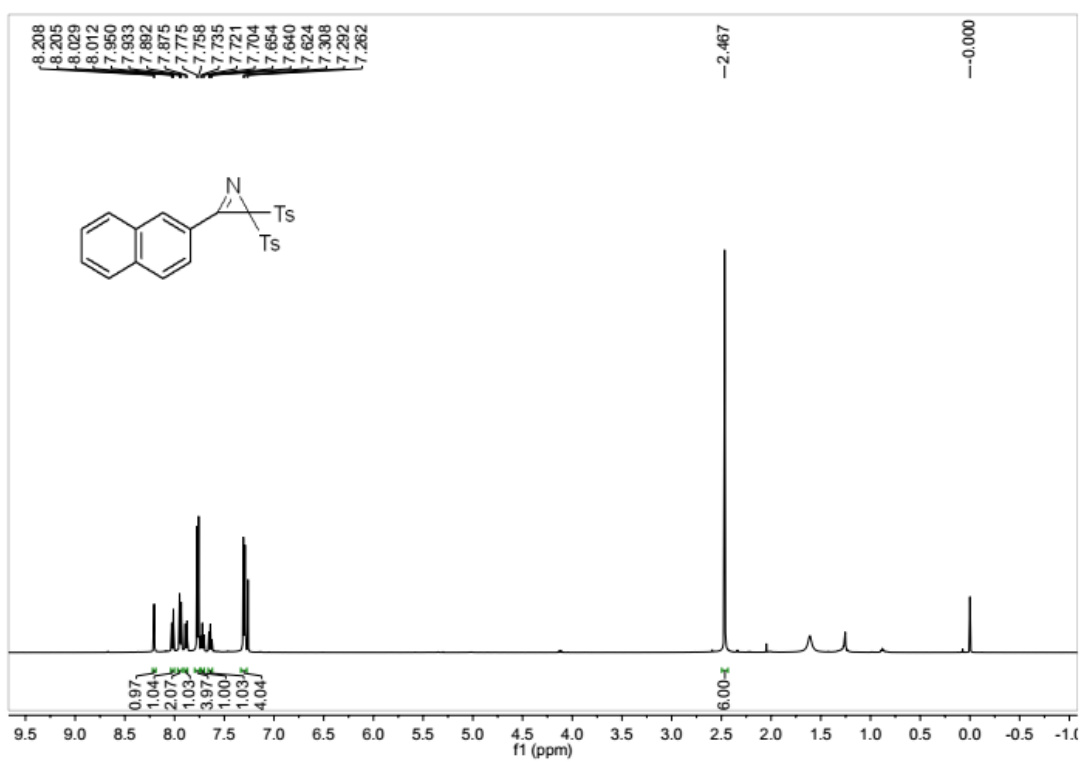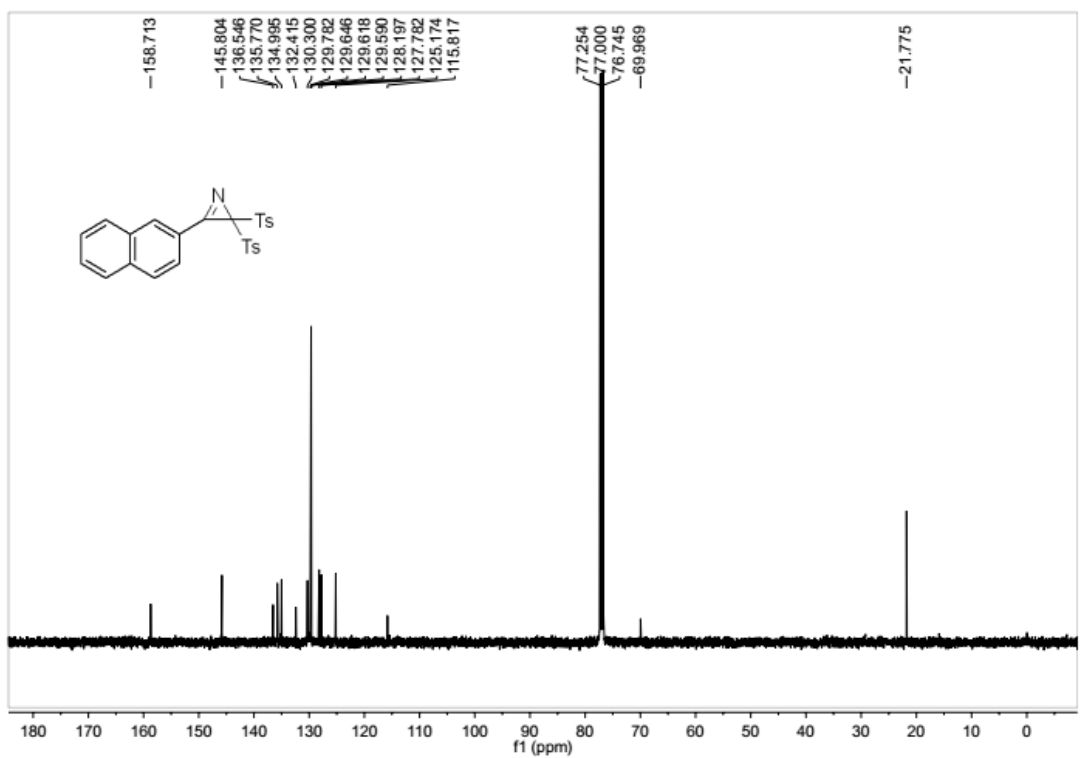



### 3-(Thiophen-3-yl)-2,2-ditosyl-2H-azirine (3ka):

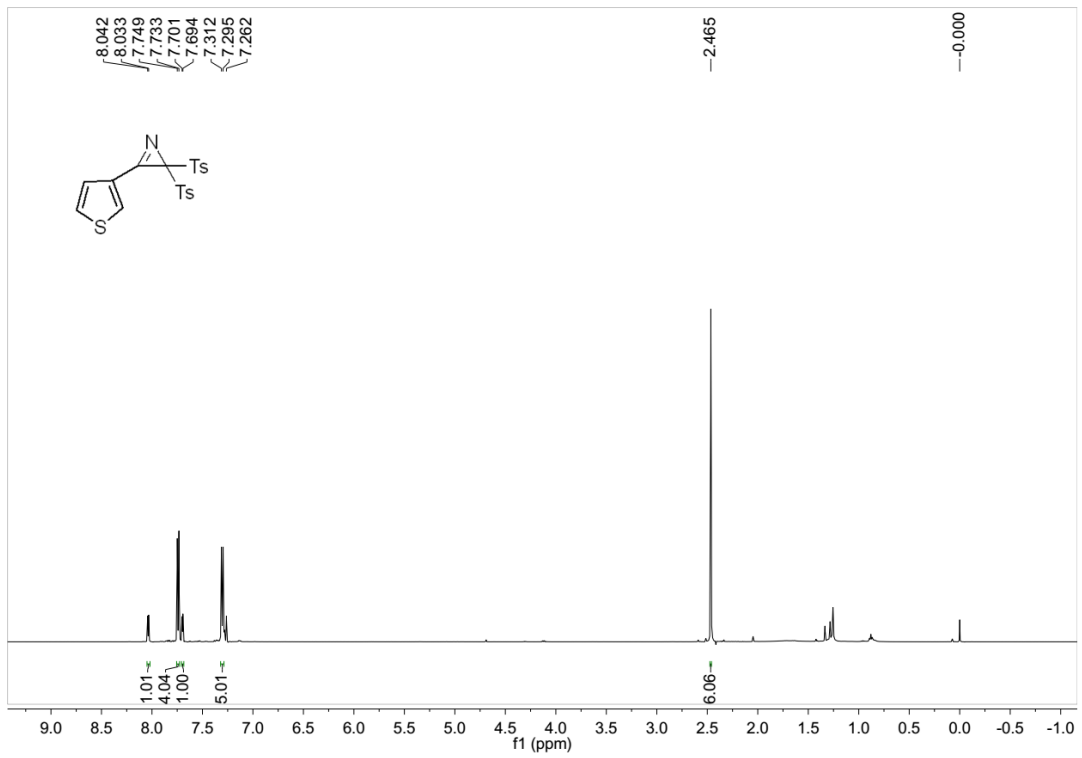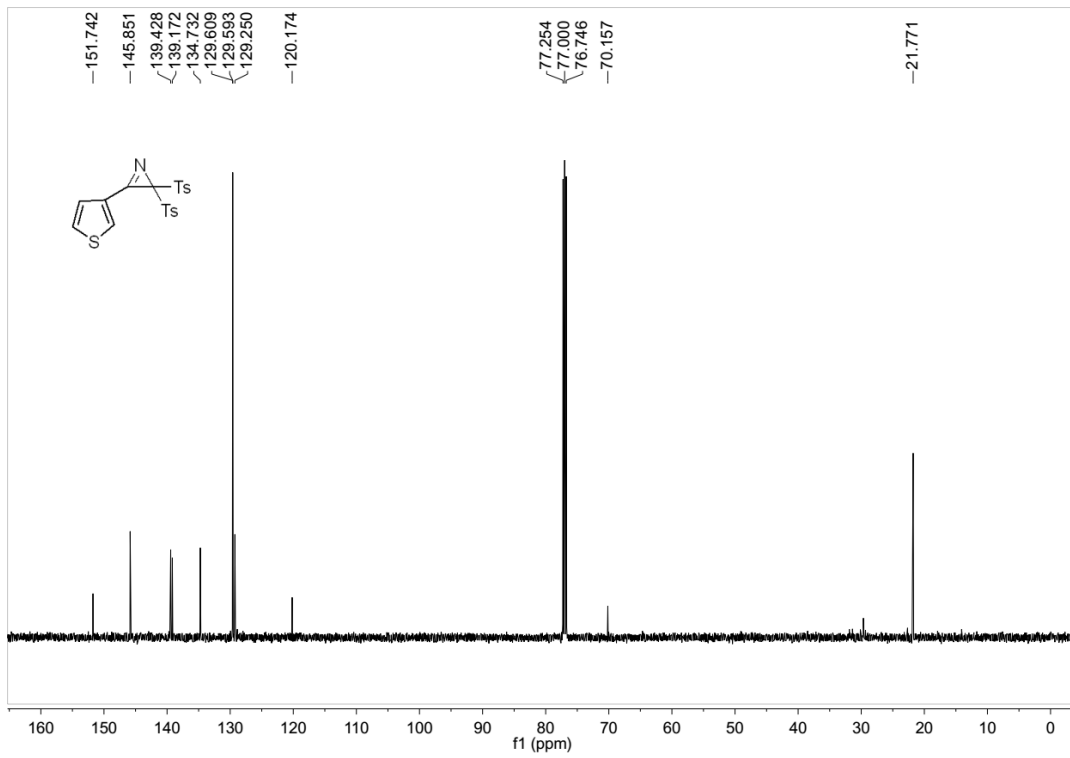

### 3-Cyclohexyl-2,2-ditosyl-2H-azirine (3la):

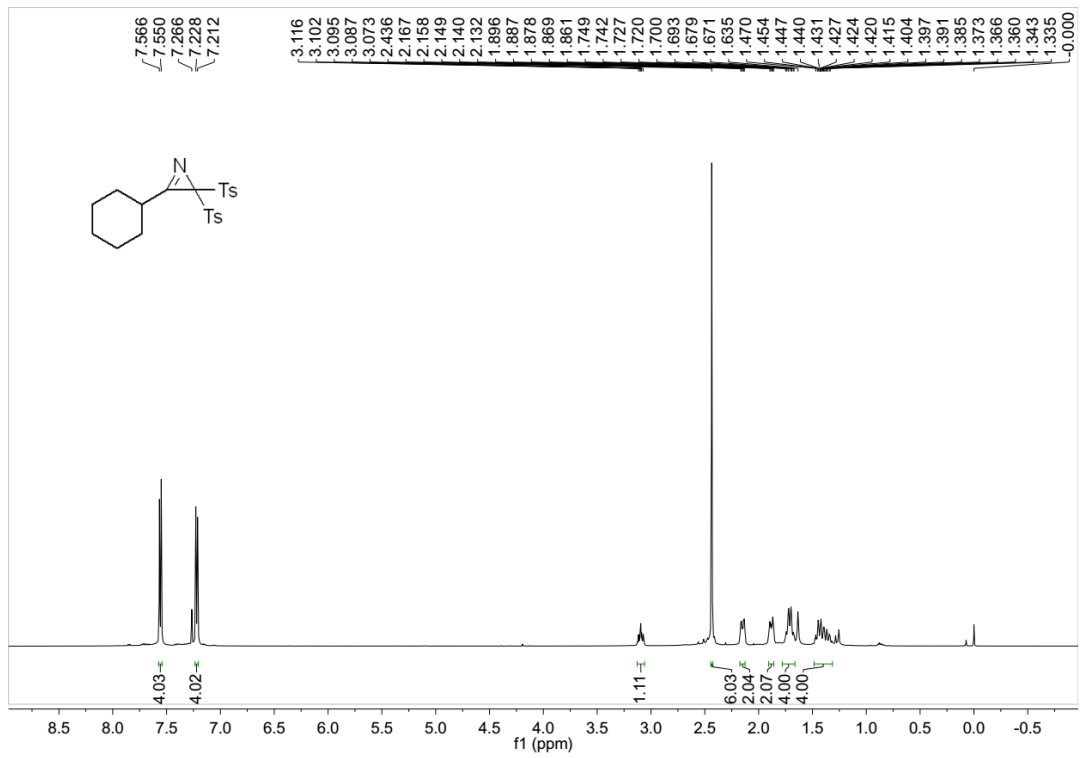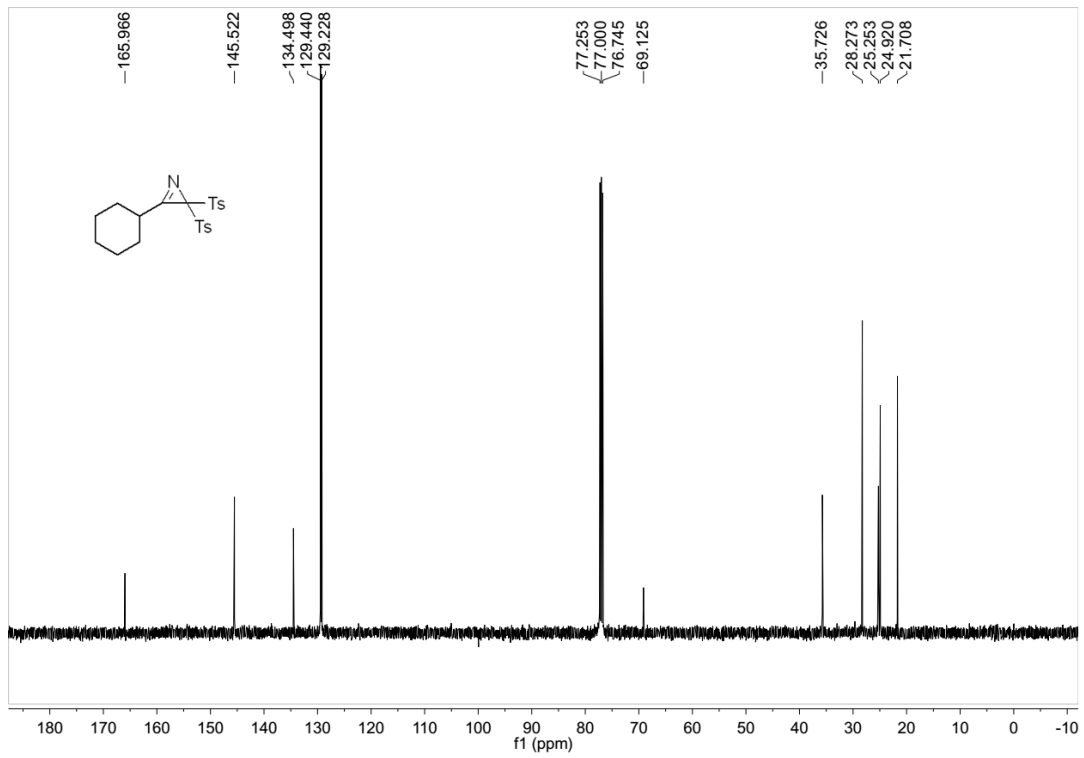

### 3-Benzyl-2,2-ditosyl-2H-azirine (3ma):

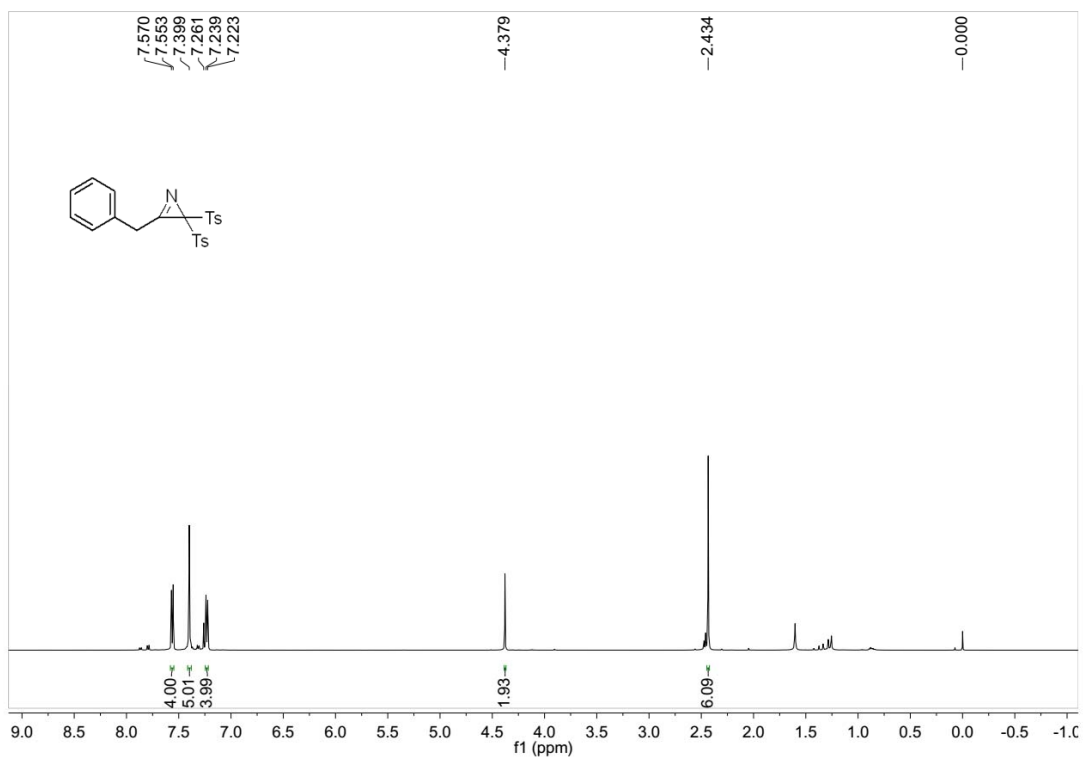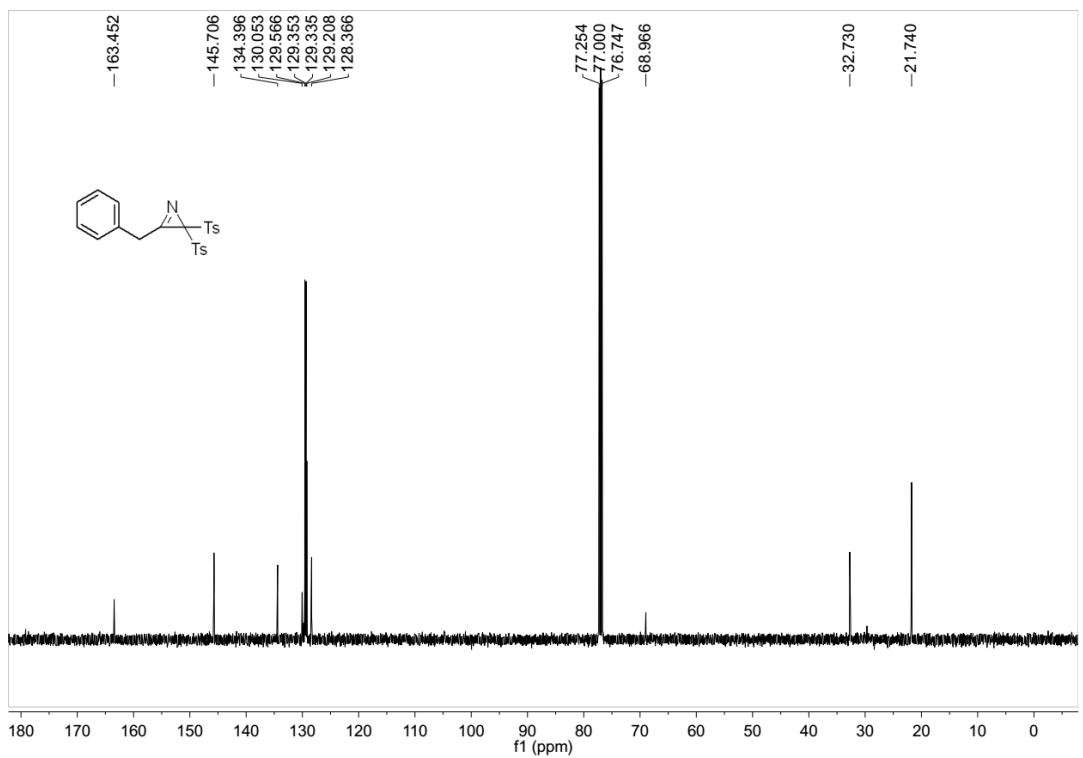

### 3-Pentyl-2,2-ditosyl-2H-azirine (3na):

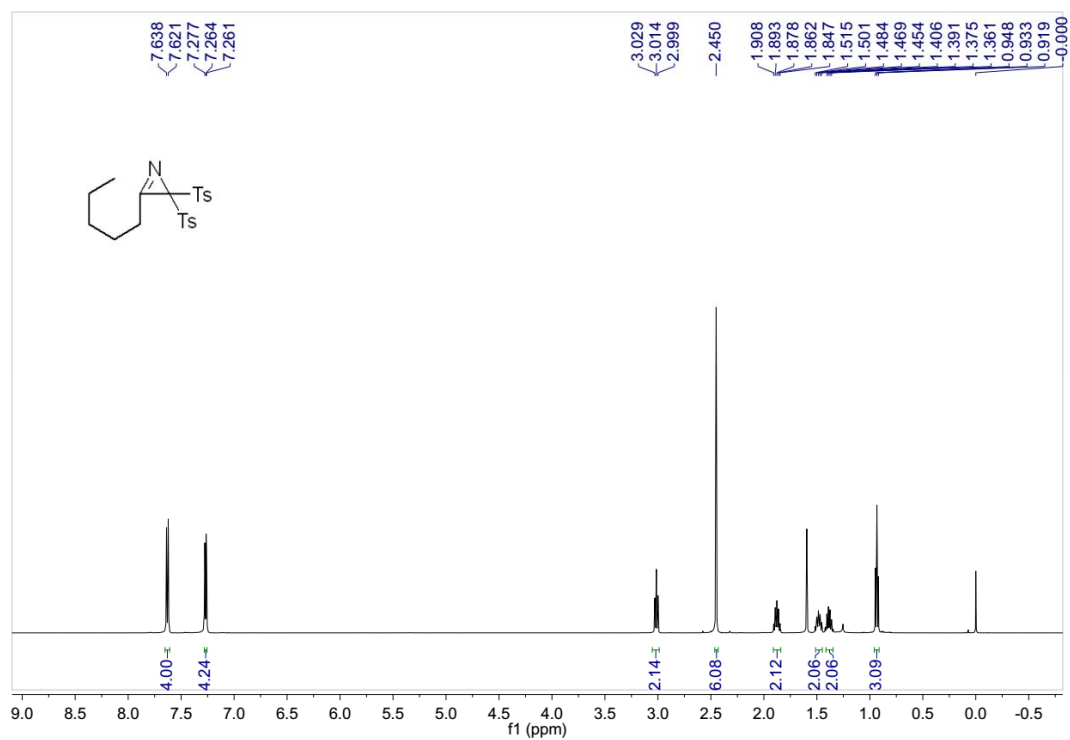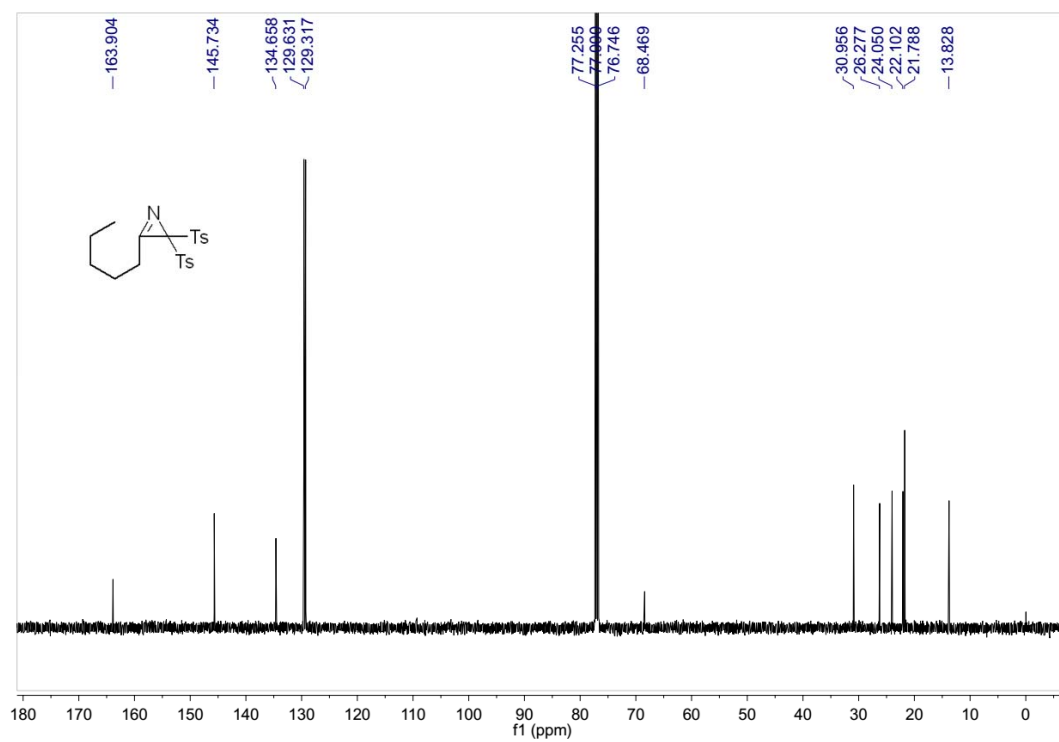

### 3-(3-Chloropropyl)-2,2-ditosyl-2H-azirine (30a):

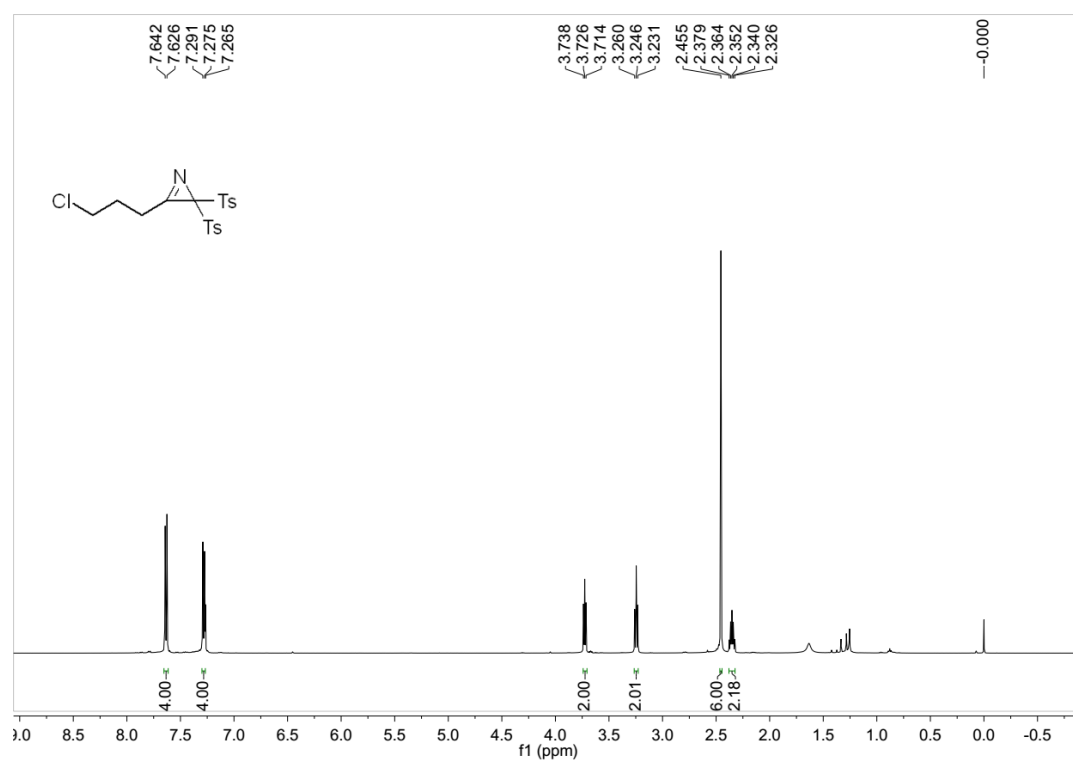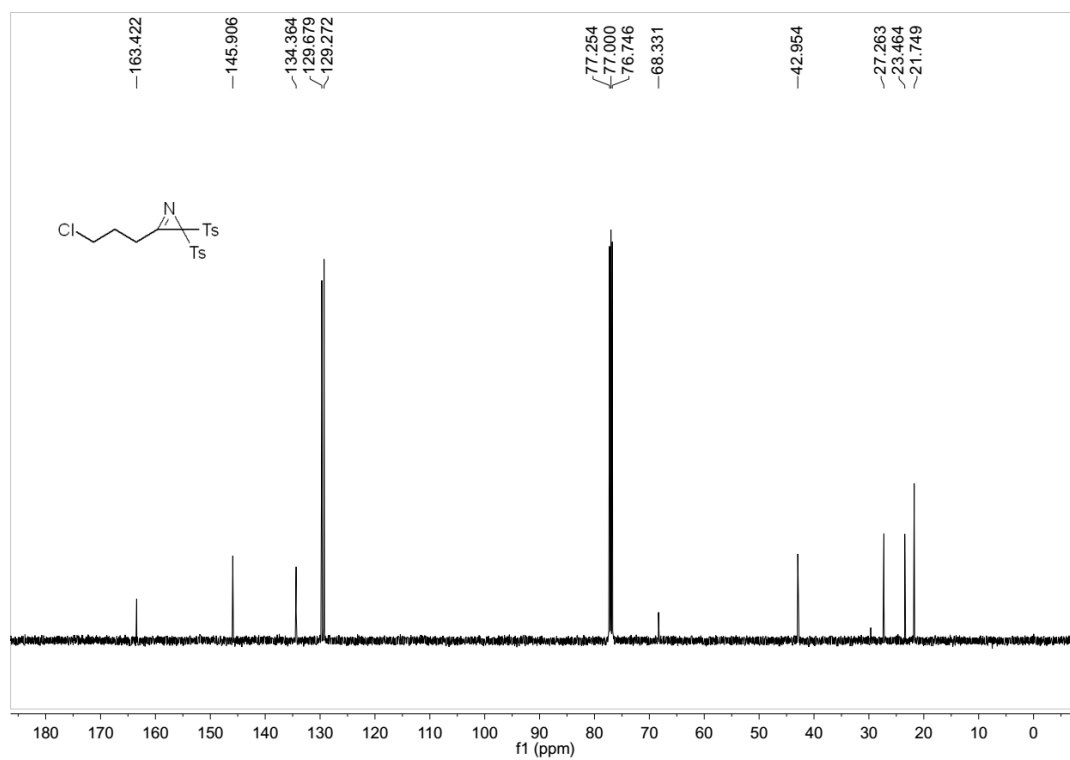

### Methyl 9-(2,2-ditosyl-2H-azirin-3-yl)nonanoate (3pa):

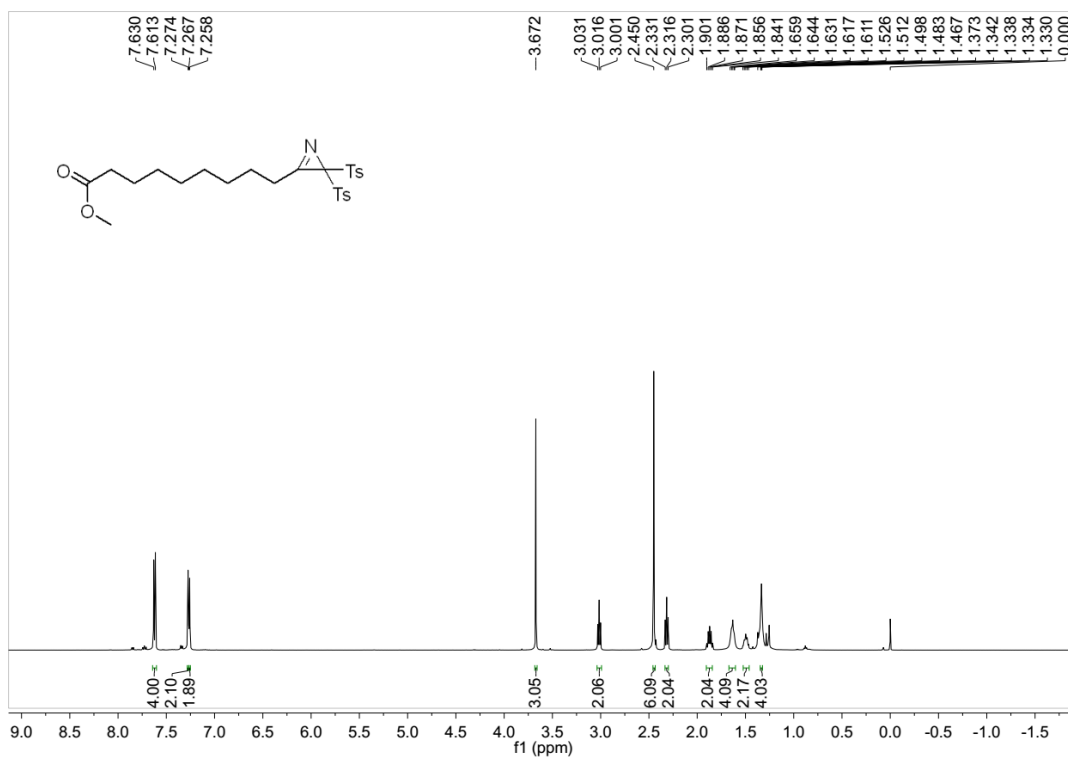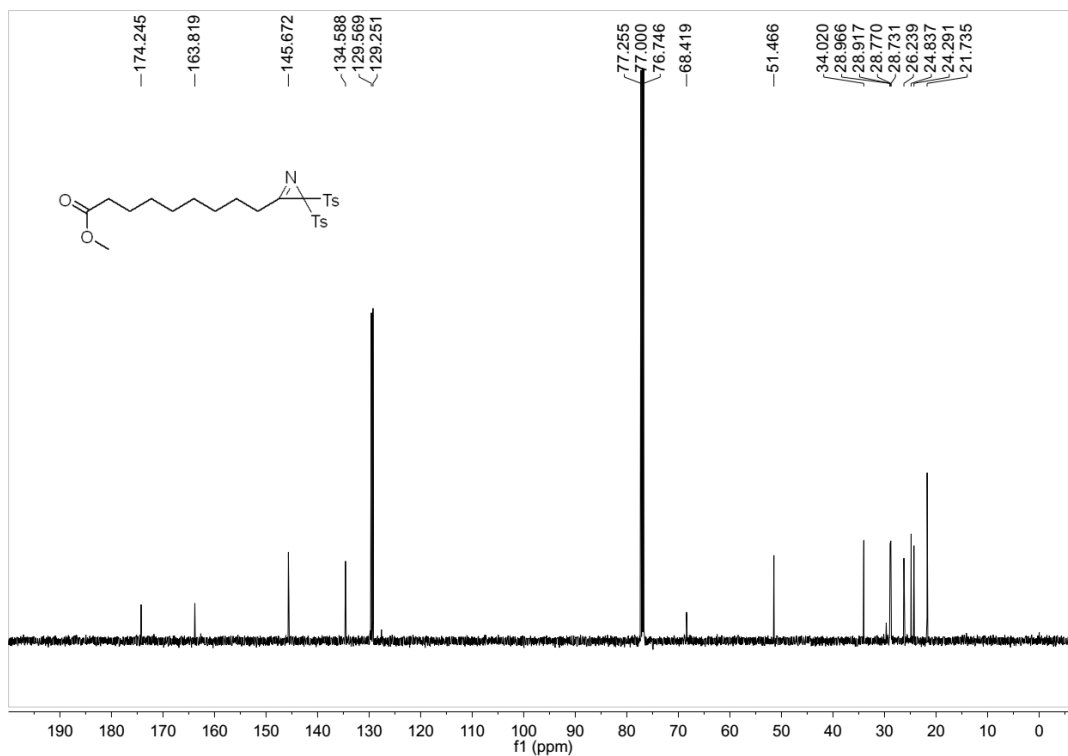

### 1,3-Bis(2,2-ditosyl-2*H*-azirin-3-yl)benzene (3qa):

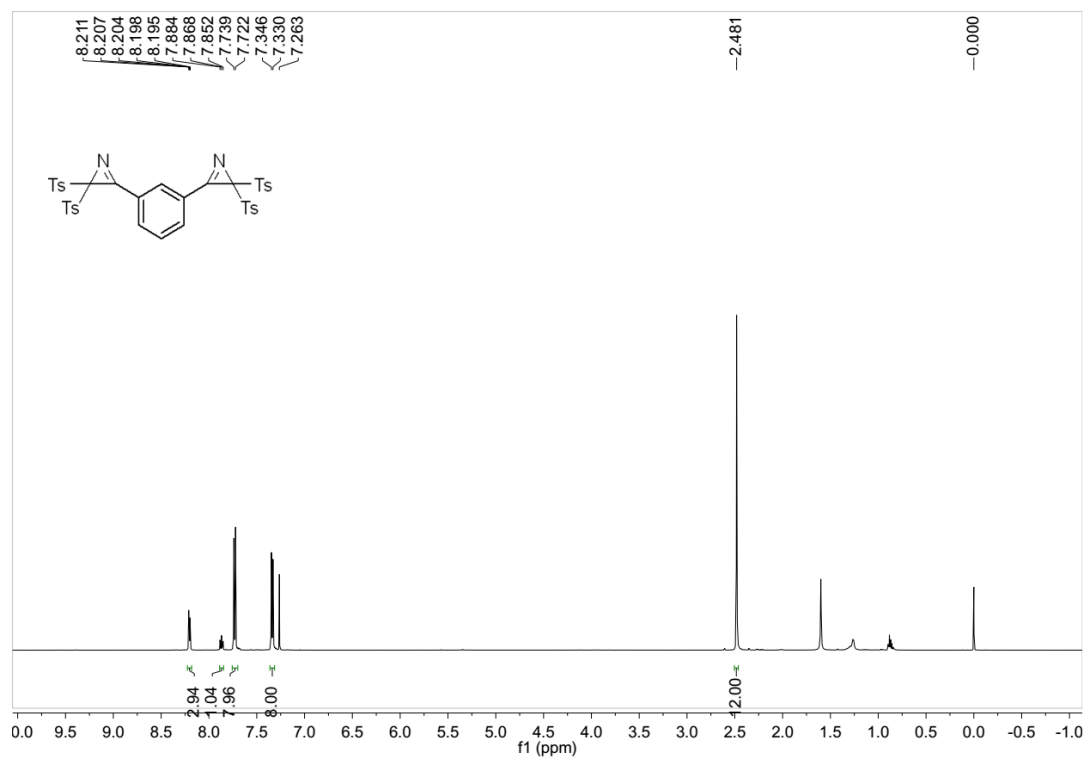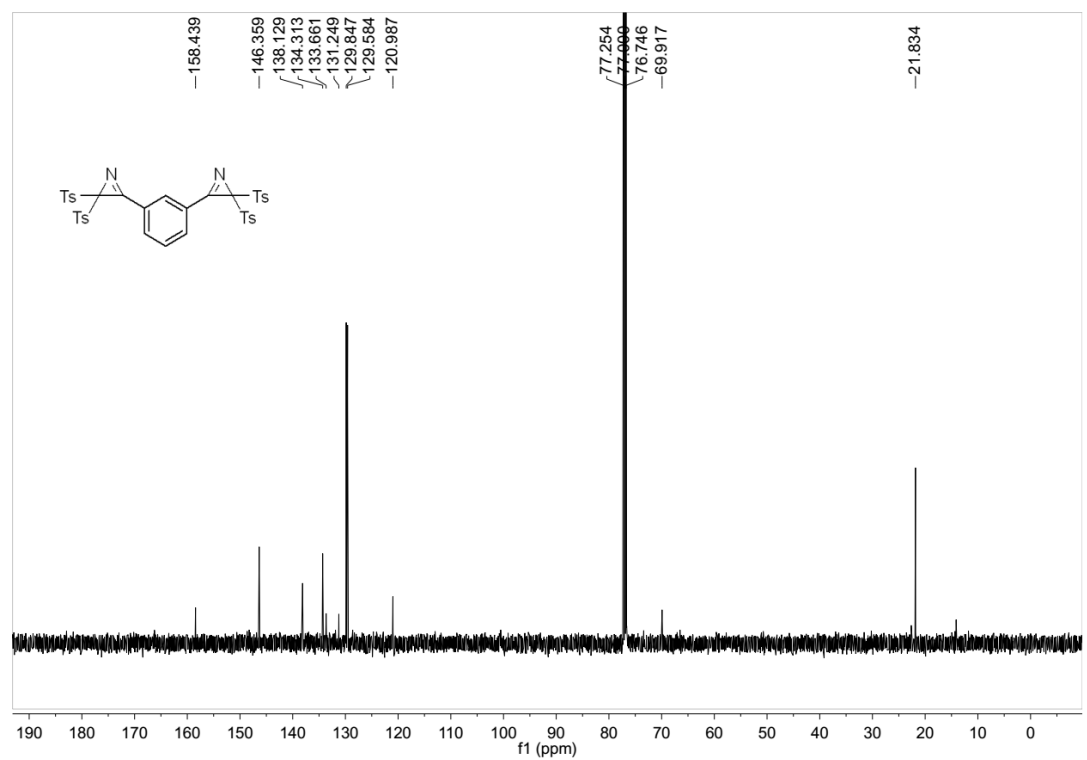

**(1*R*,2*S*,5*R*)-2-isopropyl-5-methylcyclohexyl-4-(2,2-ditosyl-2*H*-azirin-3-yl)benzoate  
e (3ra):**

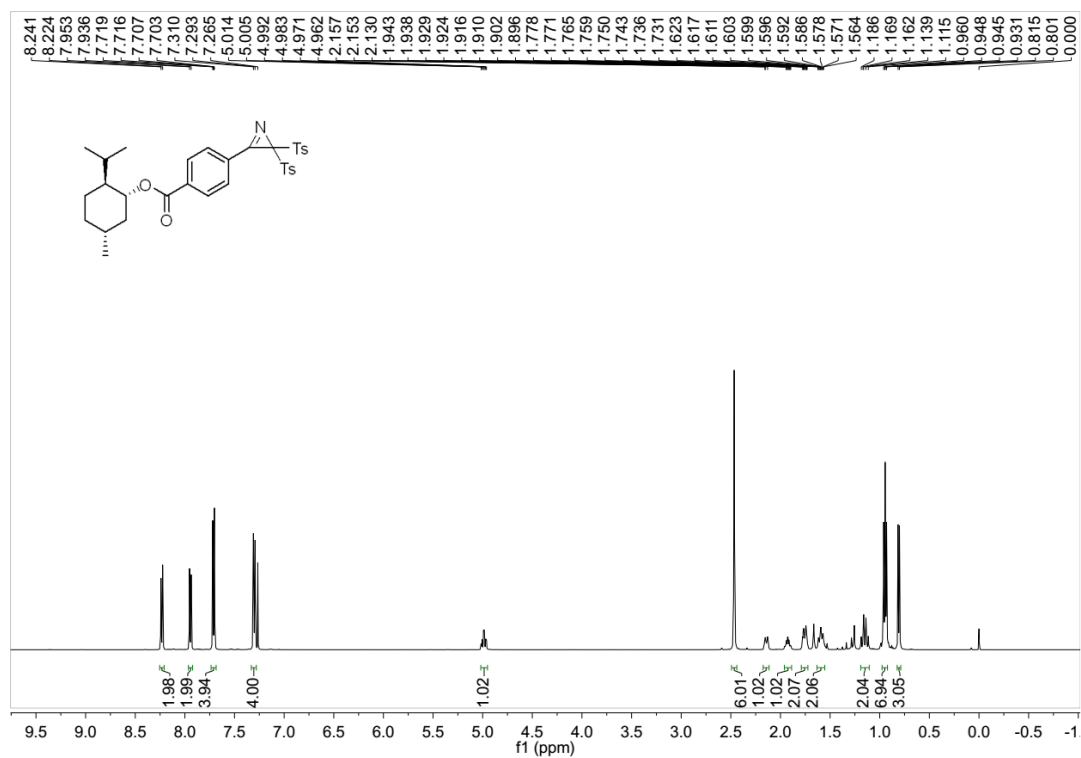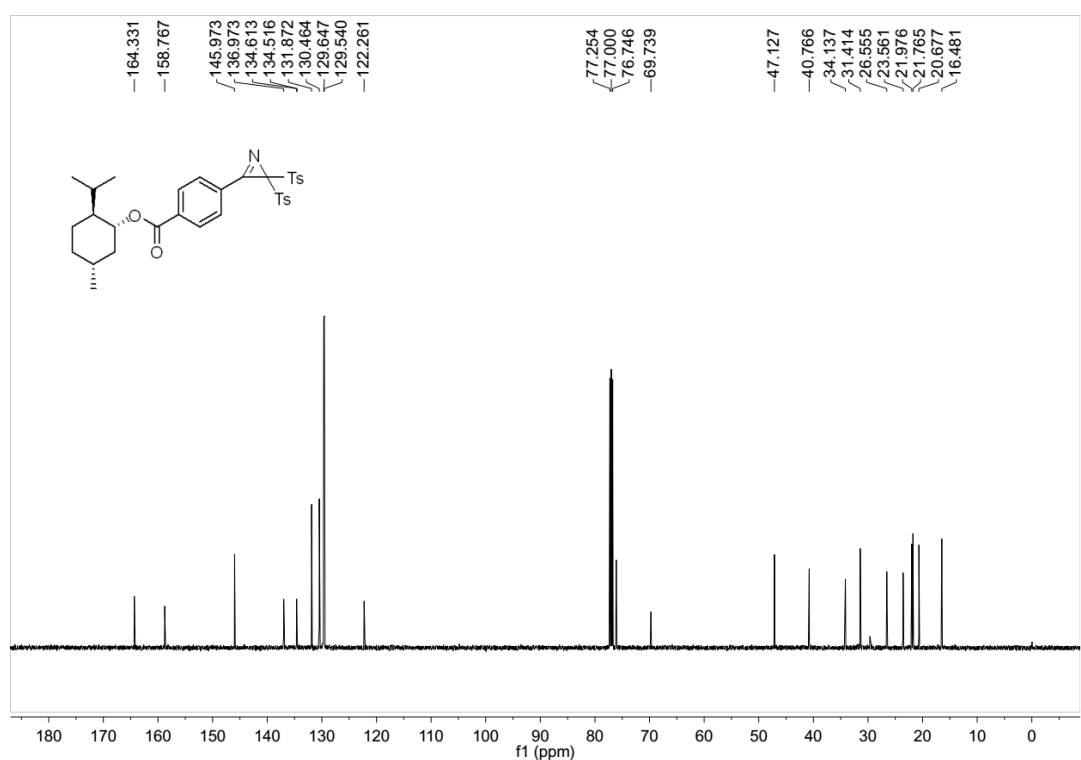



**4-(2,2-Ditosyl-2H-azirin-3-yl)benzyl-N-(tert-butoxycarbonyl)-N-methylglycinate  
(3sa):**

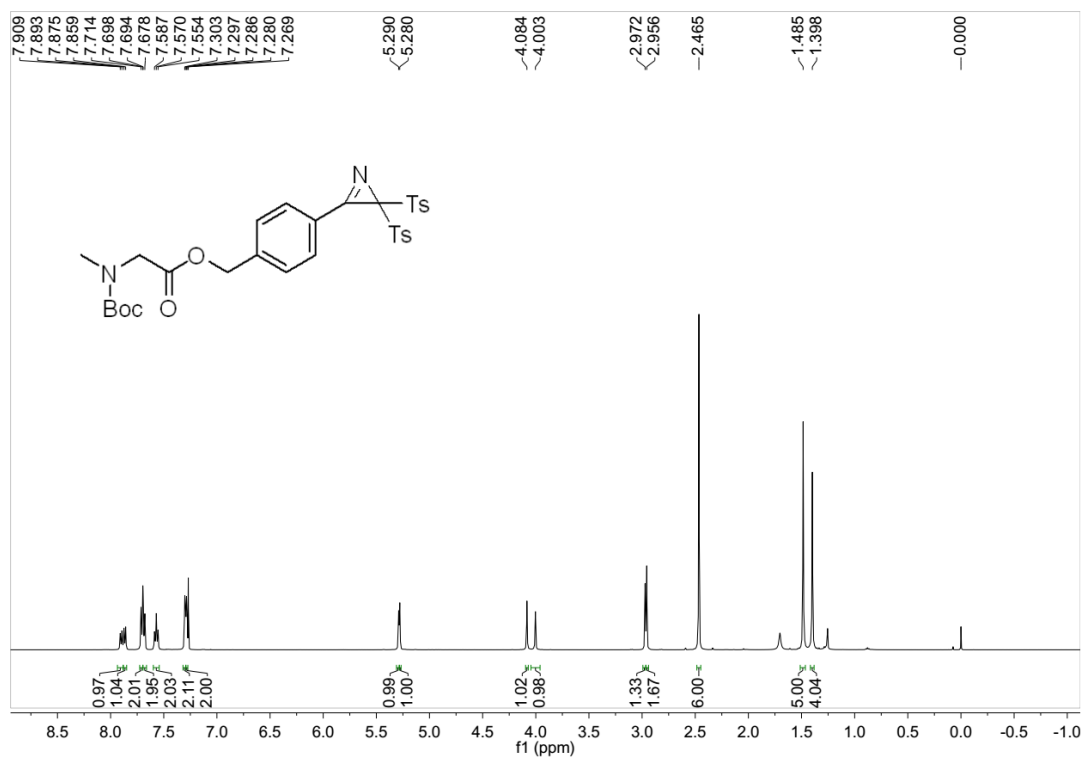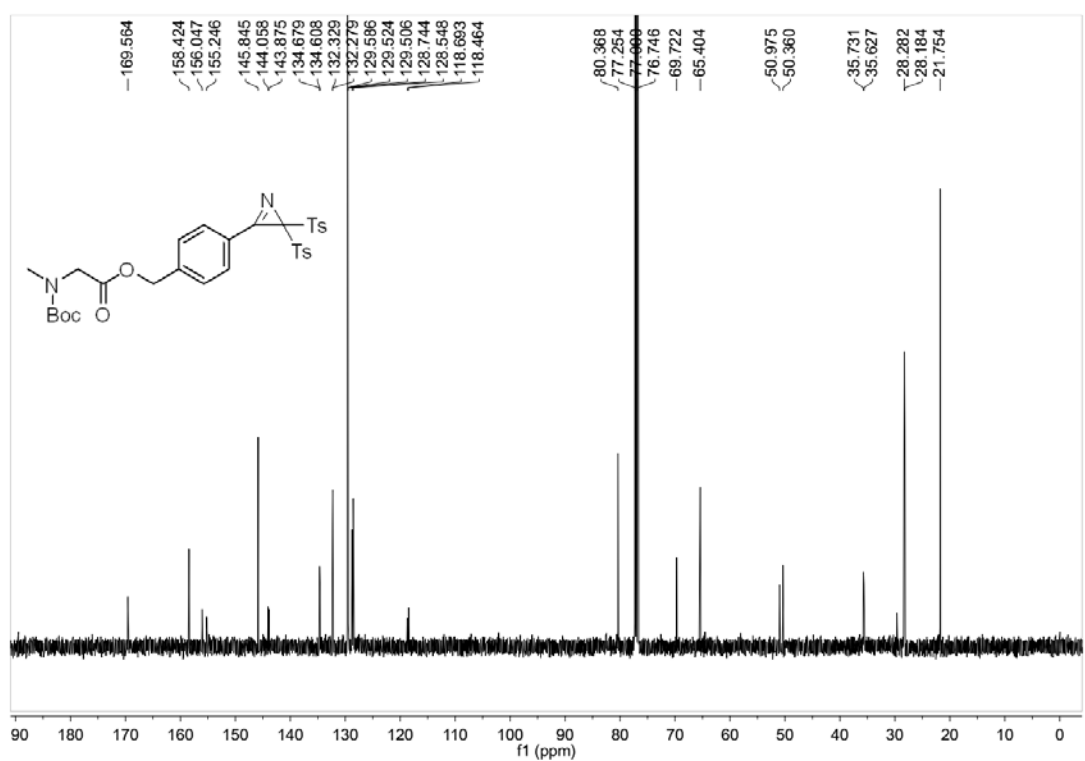

**1-(*tert*-Butyl)-2-(4-(2,2-ditosyl-2*H*-azirin-3-yl)benzyl)-(S)-pyrrolidine-1,2-dicarboxylate (3ta):**

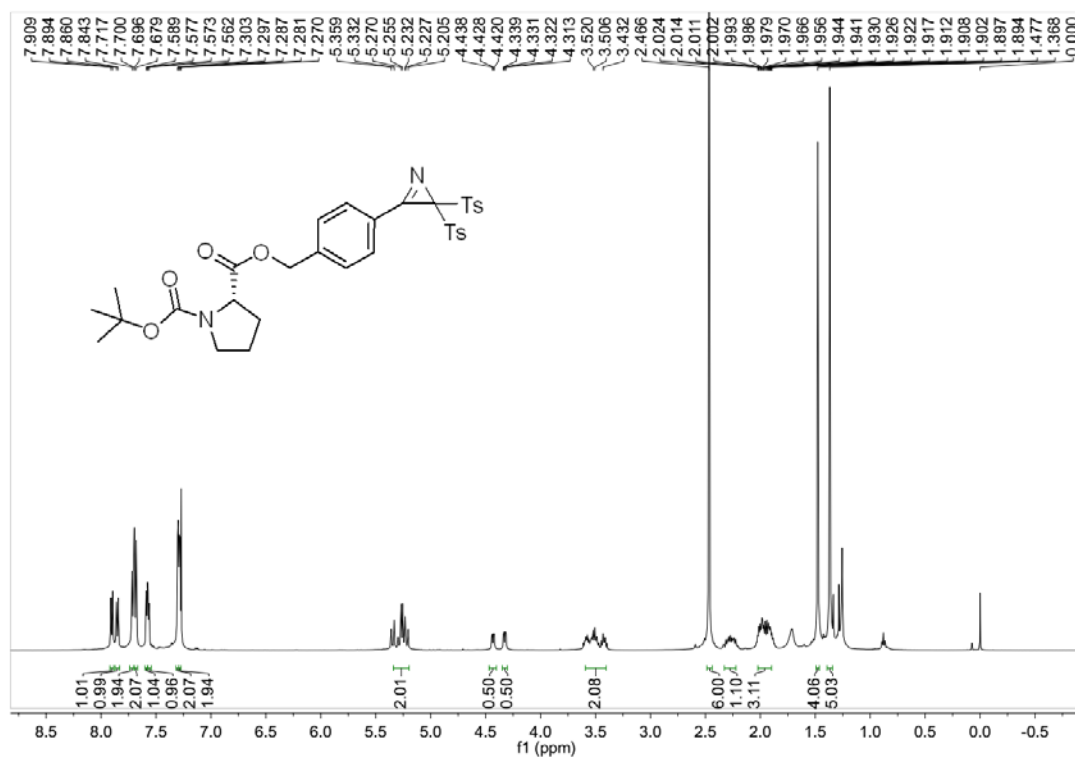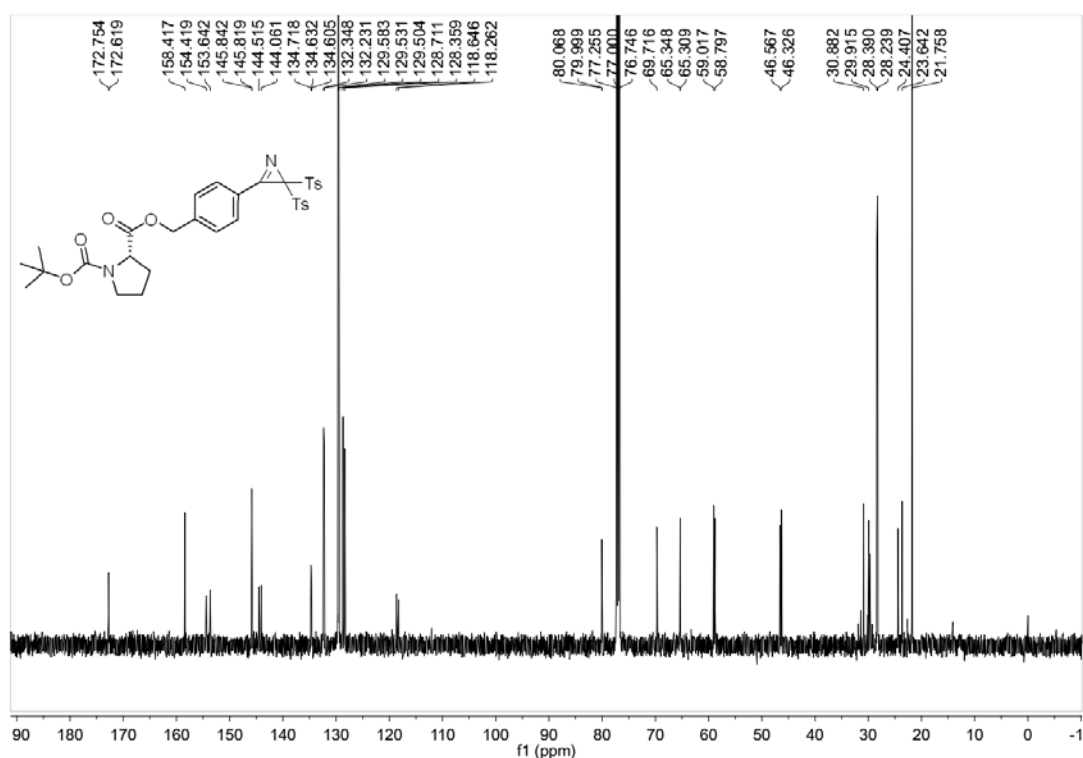

4-(2,2-Ditosyl-2H-azirin-3-yl)benzyl-2-((3*r*,5*r*,7*r*)-adamantan-1-yl)acetate (3ua):

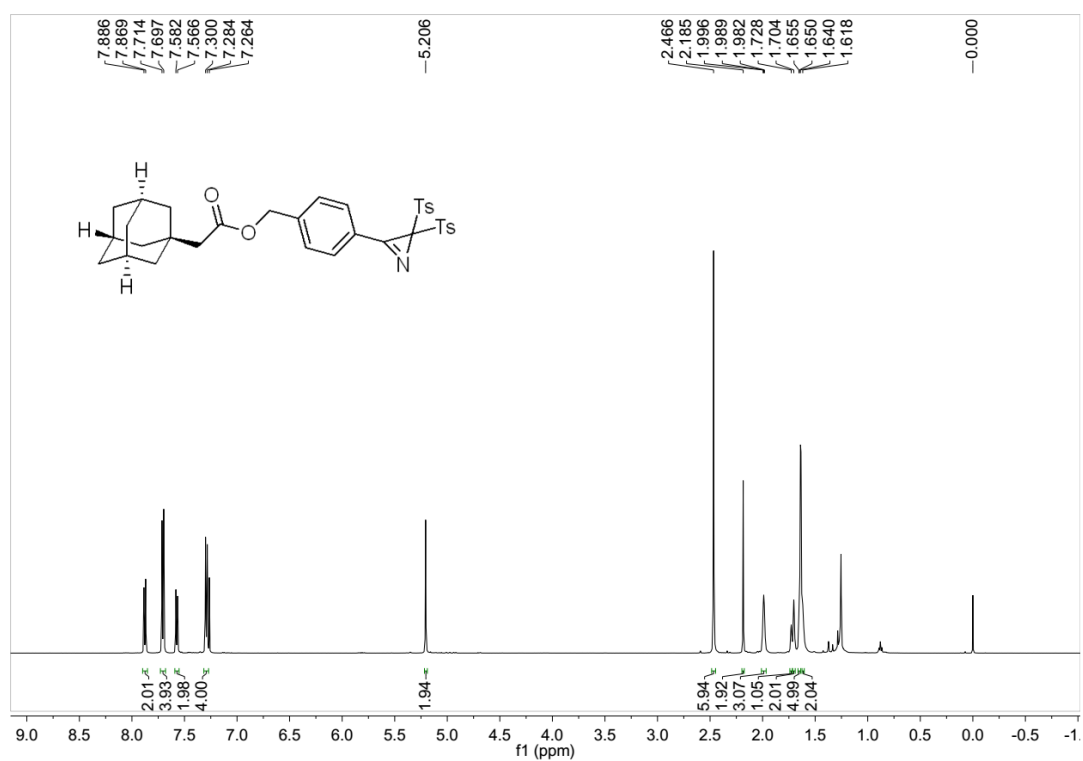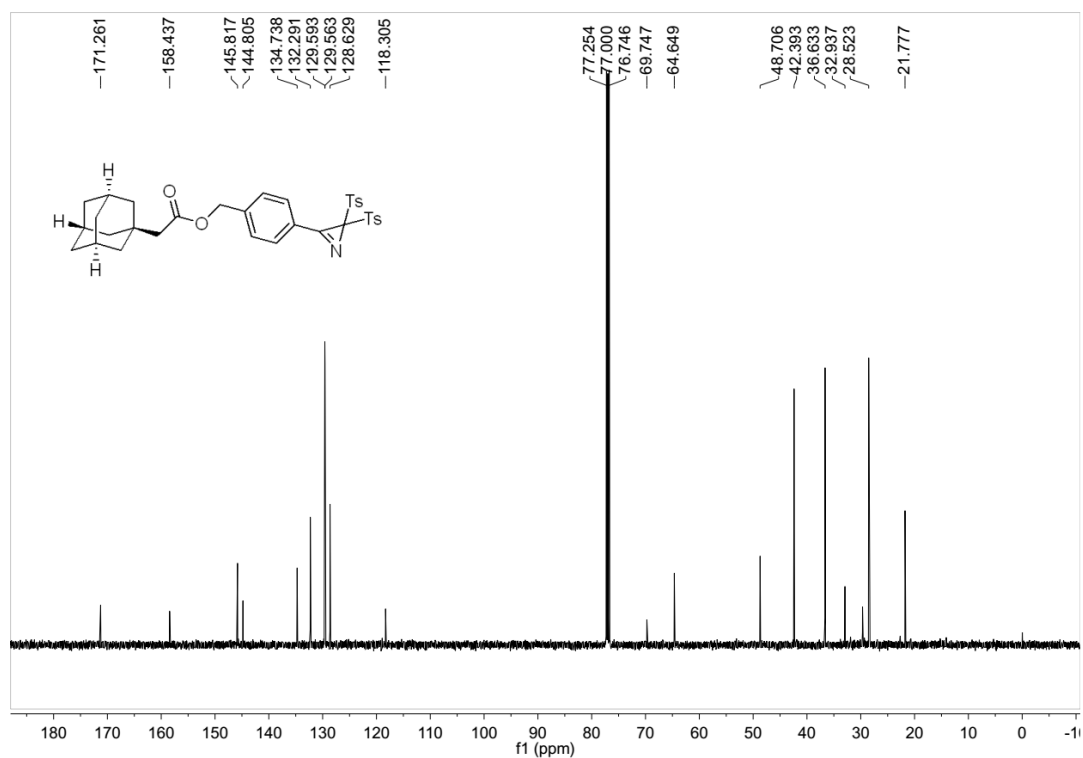

**4-(2,2-Ditosyl-2*H*-azirin-3-yl)benzyl-(8*S*,9*S*,10*R*,13*S*,14*S*)-10,13-dimethyl-3-oxo-2,3,6,7,8,9,10,11,12,13,14,15,16,17-tetradecahydro-1*H*-cyclopenta[*a*]phenanthrene-17-carboxylate (3va):**

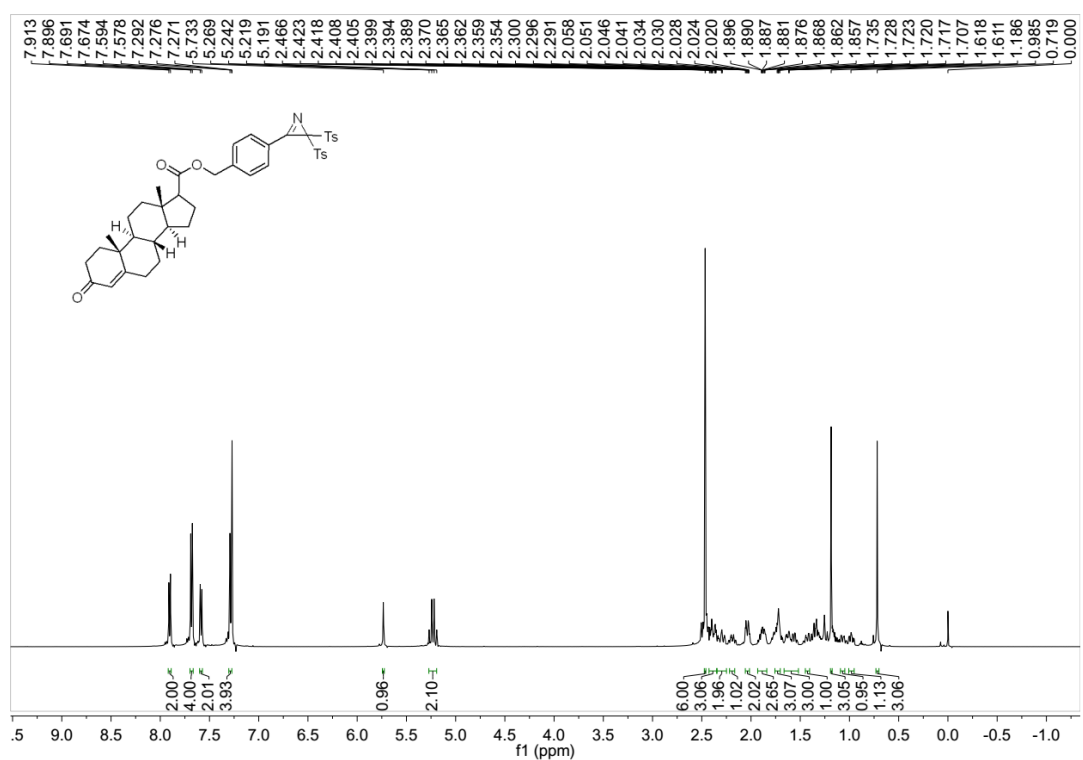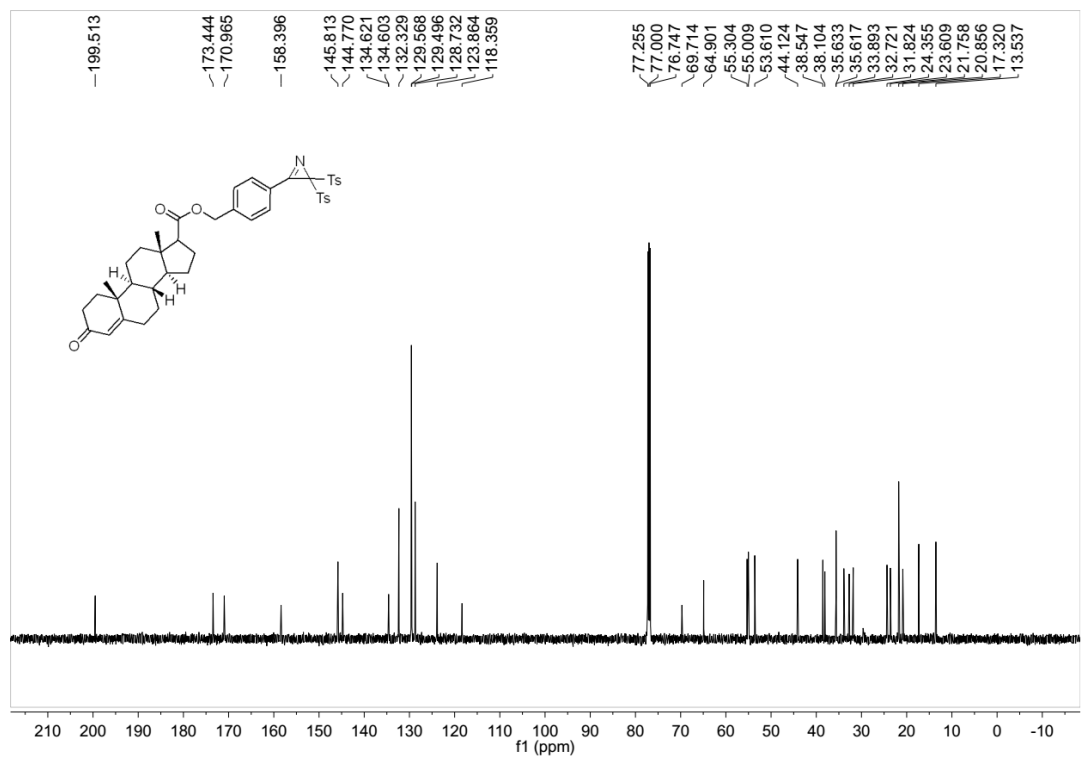

**(8*S*,9*S*,13*S*,14*S*)-3-(2,2-ditosyl-2*H*-azirin-3-yl)-6,7,8,9,11,12,13,14,15,16-decahydr  
o-17*H*-cyclopenta[*a*]phenanthren-17-one (3wa):**

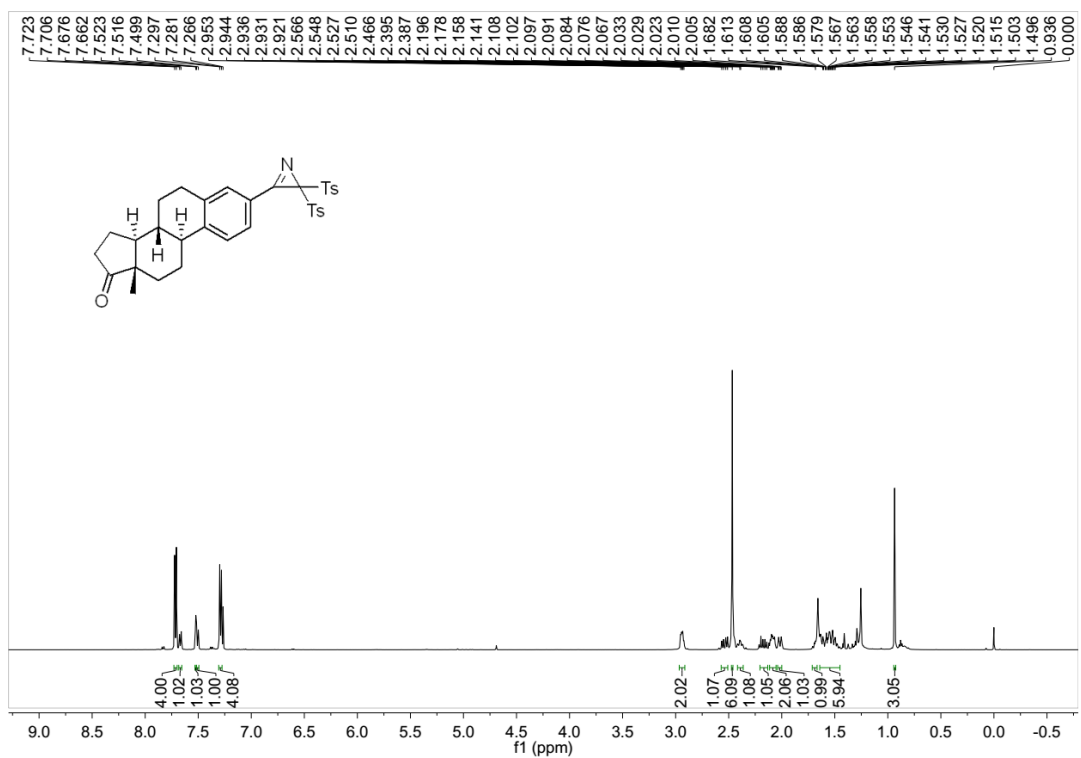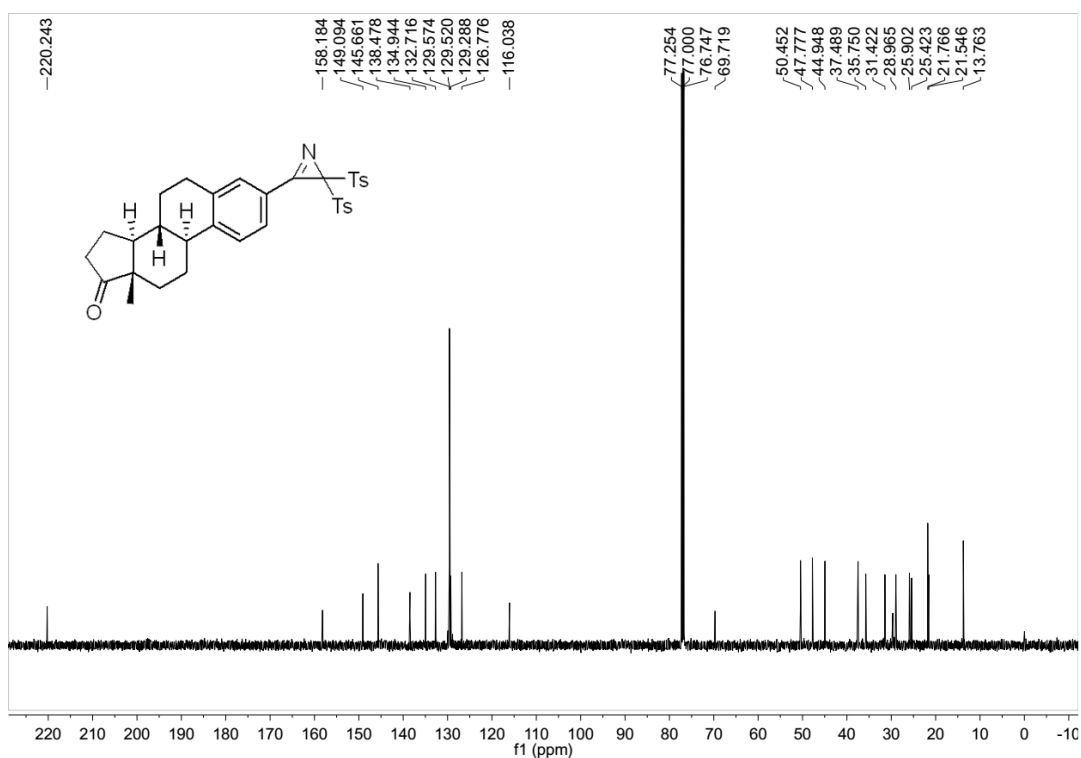

**2,2-Bis(phenylsulfonyl)-3-(*p*-tolyl)-2*H*-azirine (3cb):**

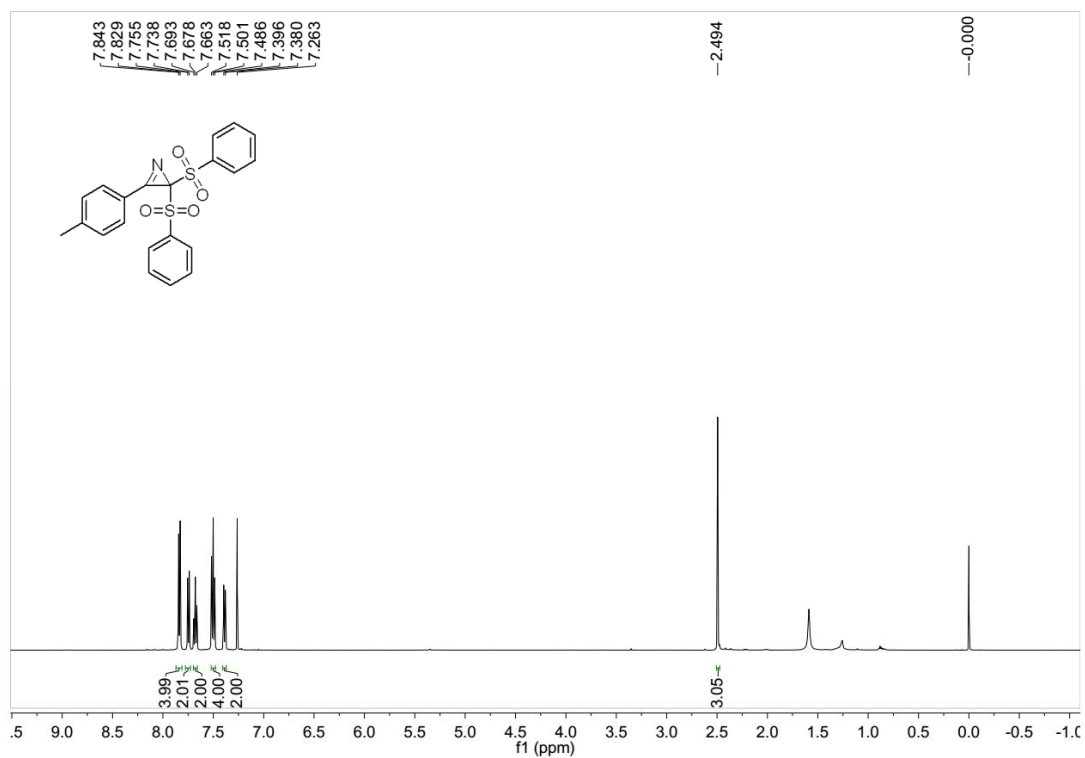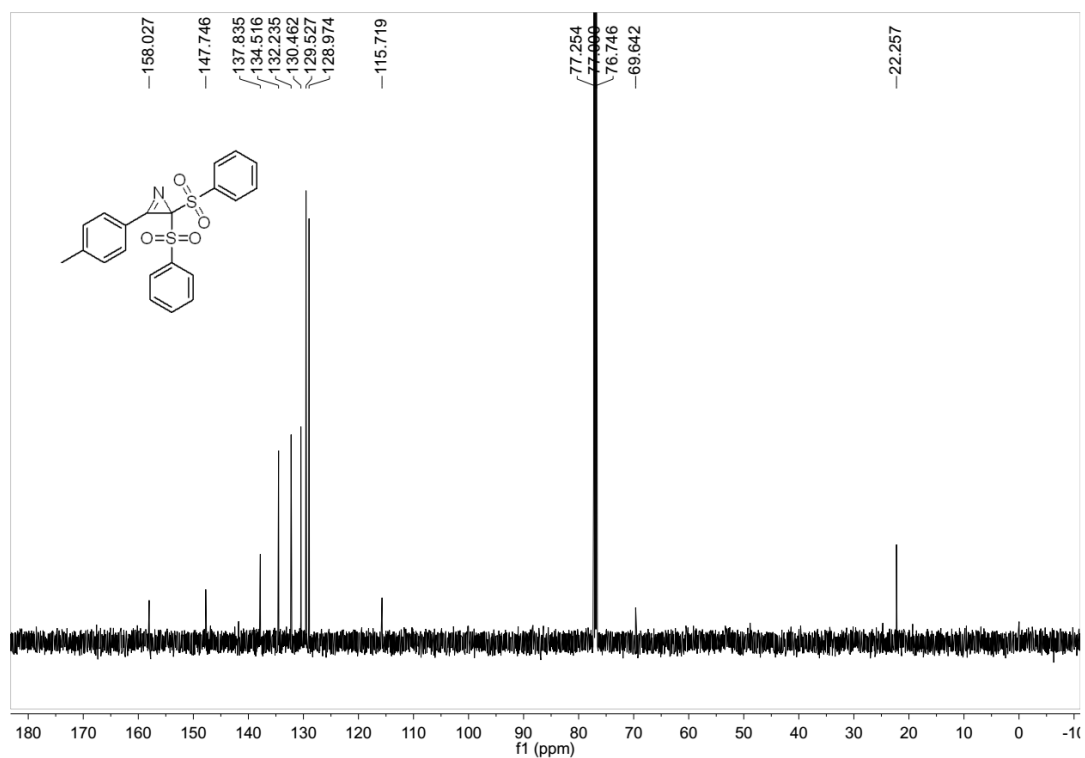

**2,2-Bis((4-chlorophenyl)sulfonyl)-3-(*p*-tolyl)-2*H*-azirine (3cc):**

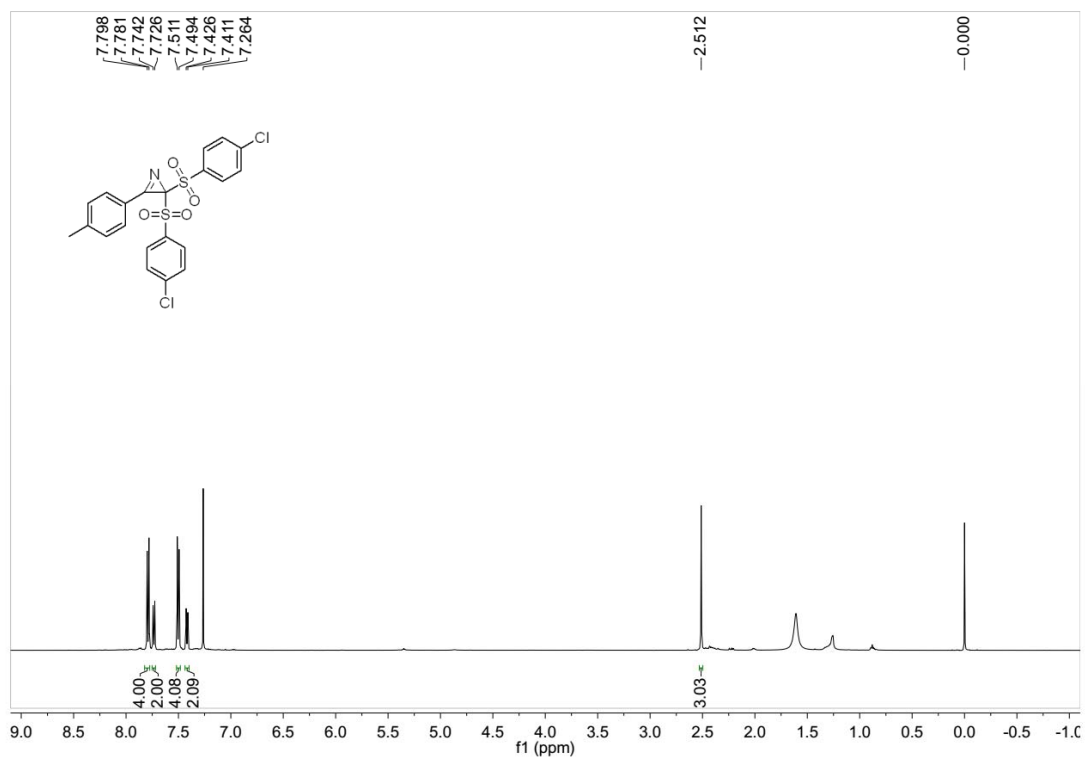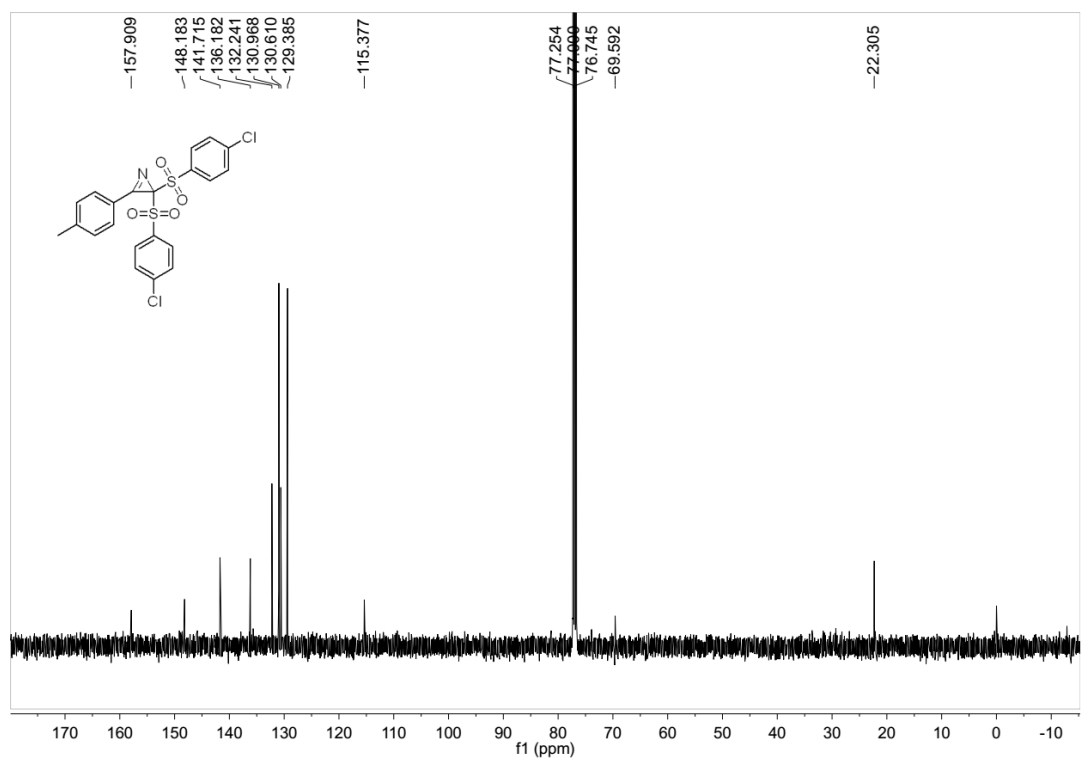

**4,4'-(3-(*p*-Tolyl)-2*H*-azirine-2,2-disulfonyl)dibenzonitrile (3cd):**

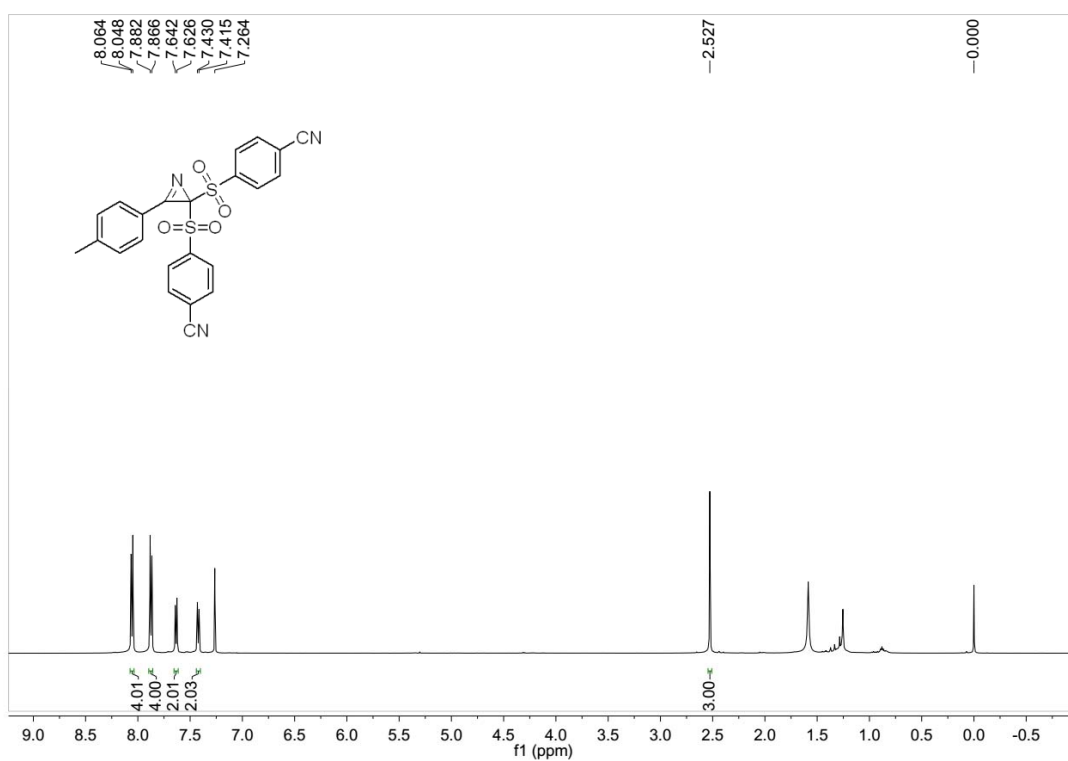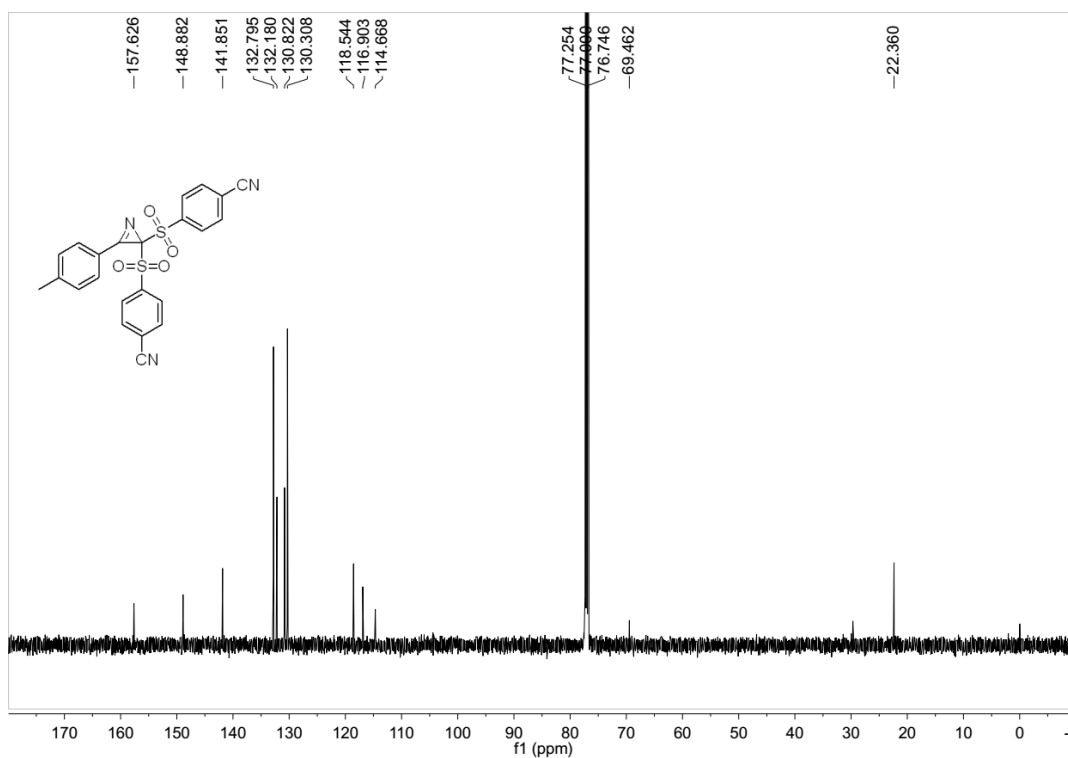



**3-(*p*-Tolyl)-2,2-bis(*m*-tolylsulfonyl)-2*H*-azirine (3ce):**

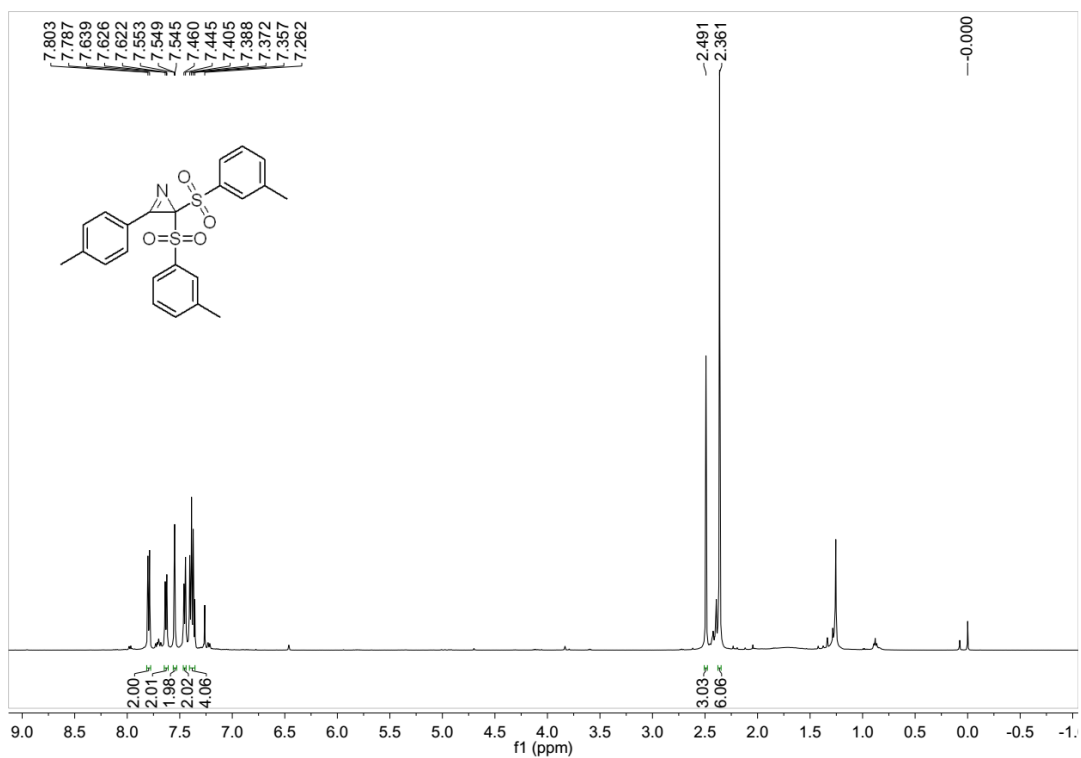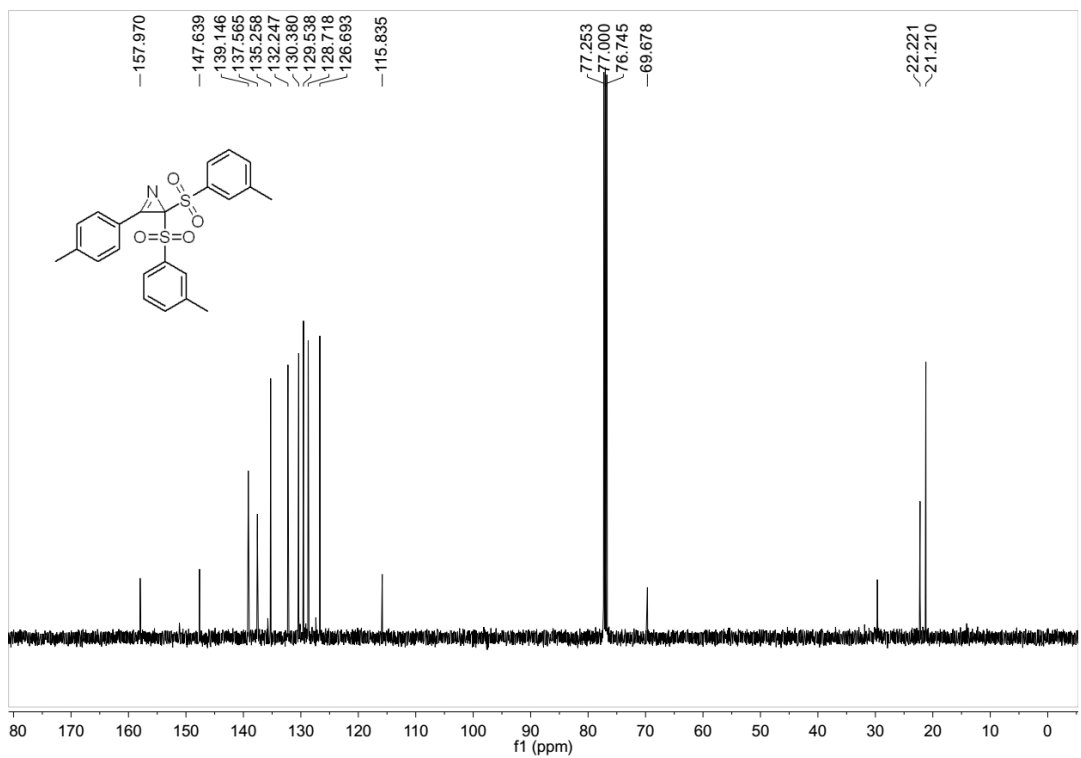

### 2,2-Bis(naphthalen-2-ylsulfonyl)-3-(*p*-tolyl)-2*H*-azirine (3cf):

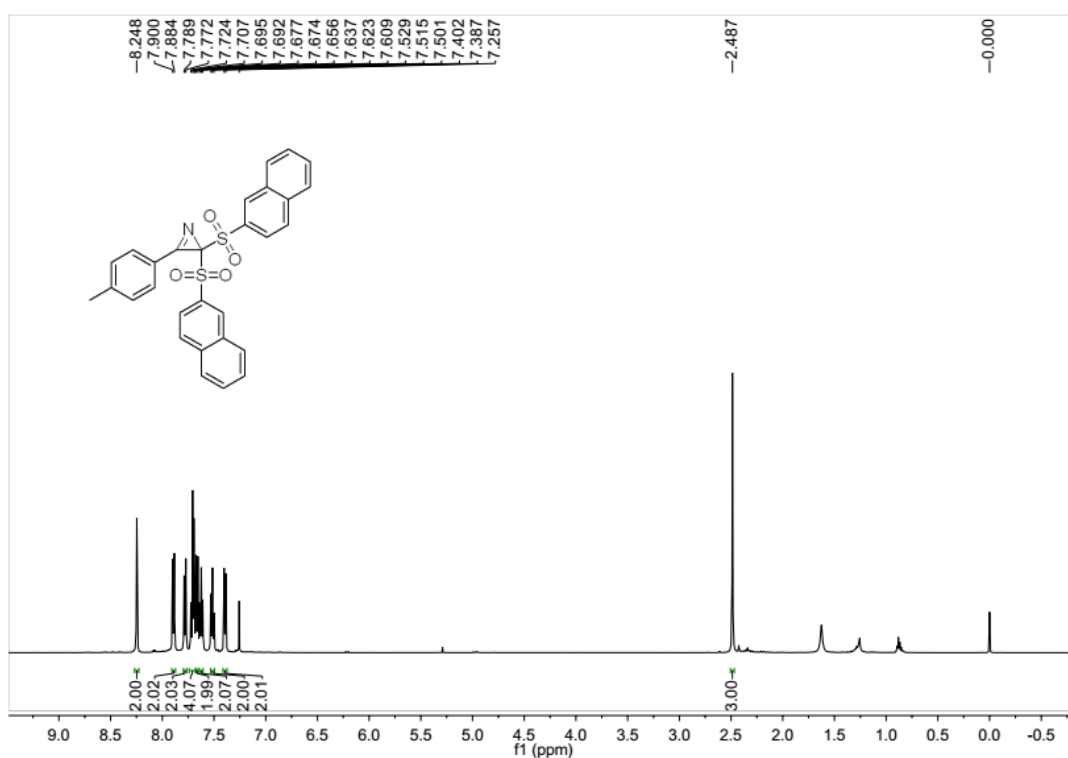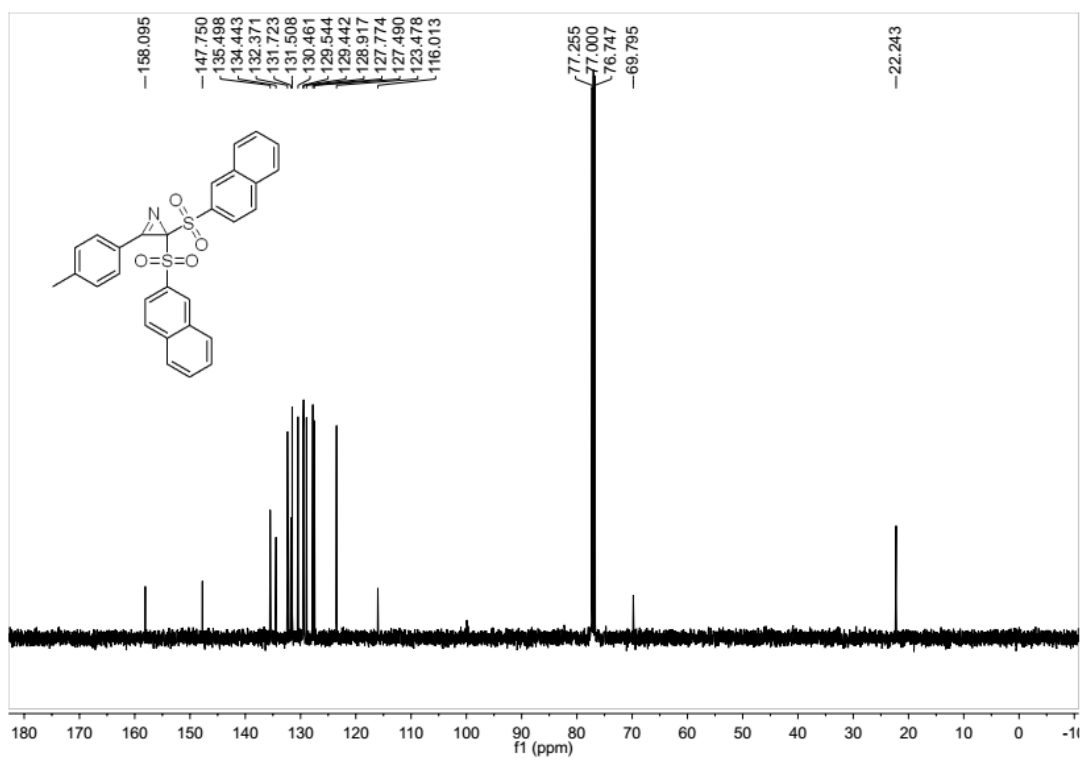

**2,2-Bis(thiophen-3-ylsulfonyl)-3-(*p*-tolyl)-2*H*-azirine (3cg):**

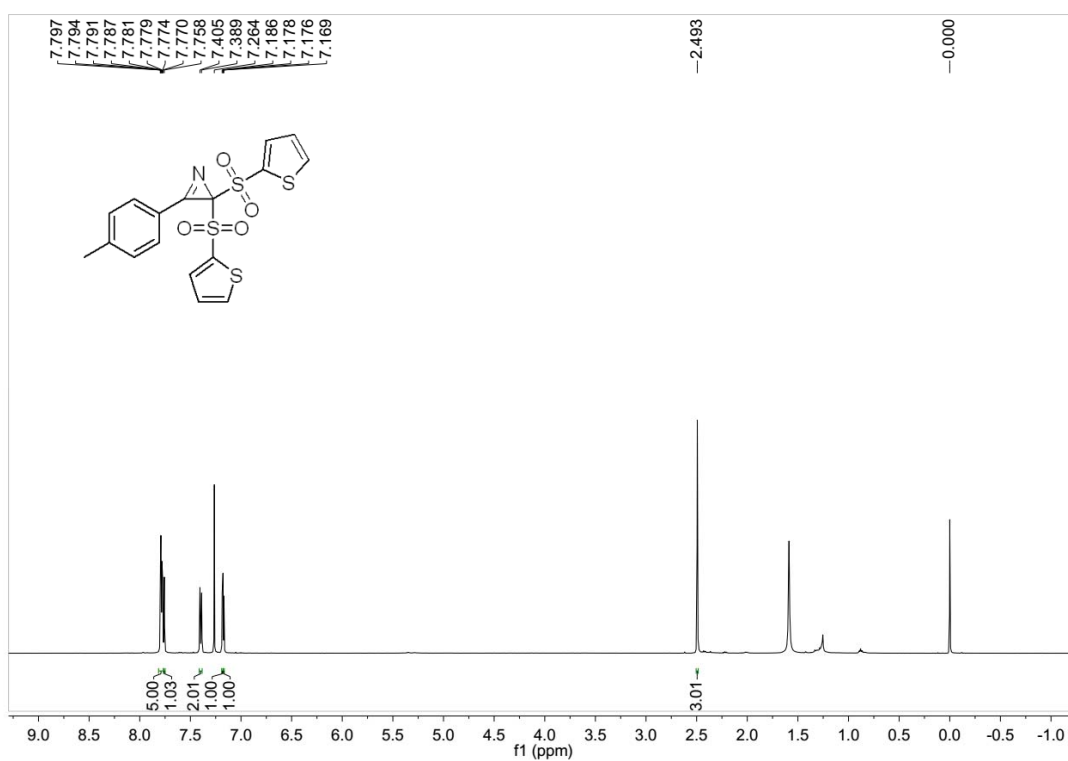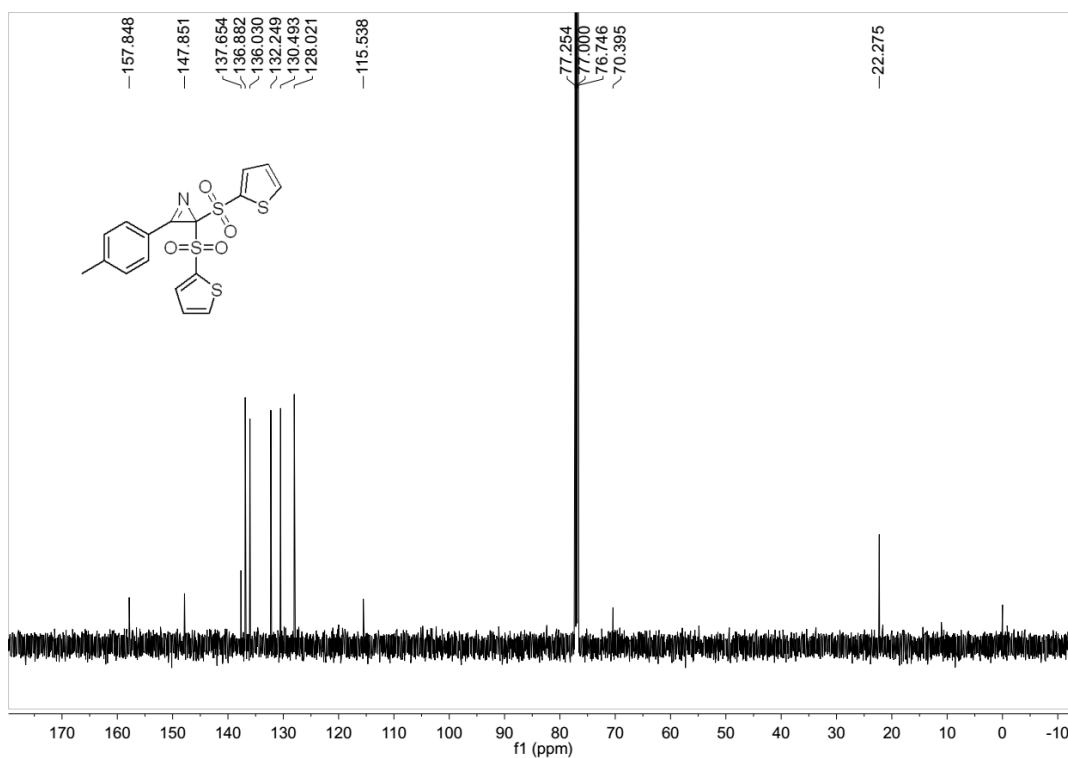

**2,2-Bis(methylsulfonyl)-3-(*p*-tolyl)-2*H*-azirine (3ch):**

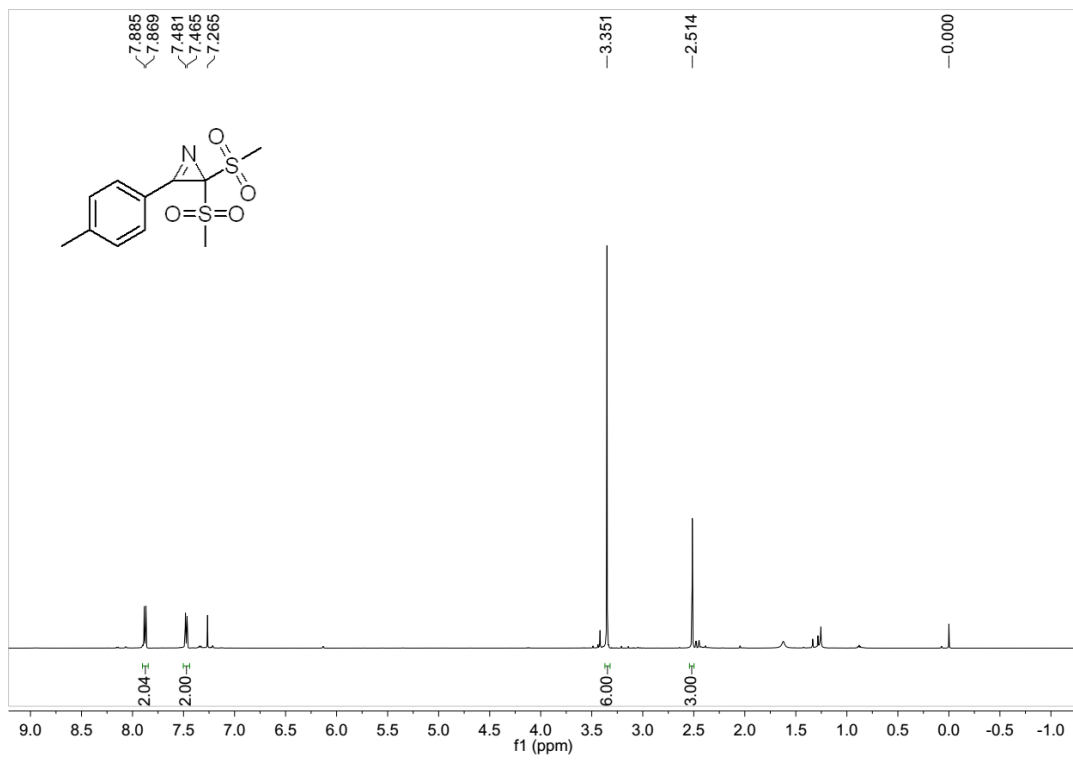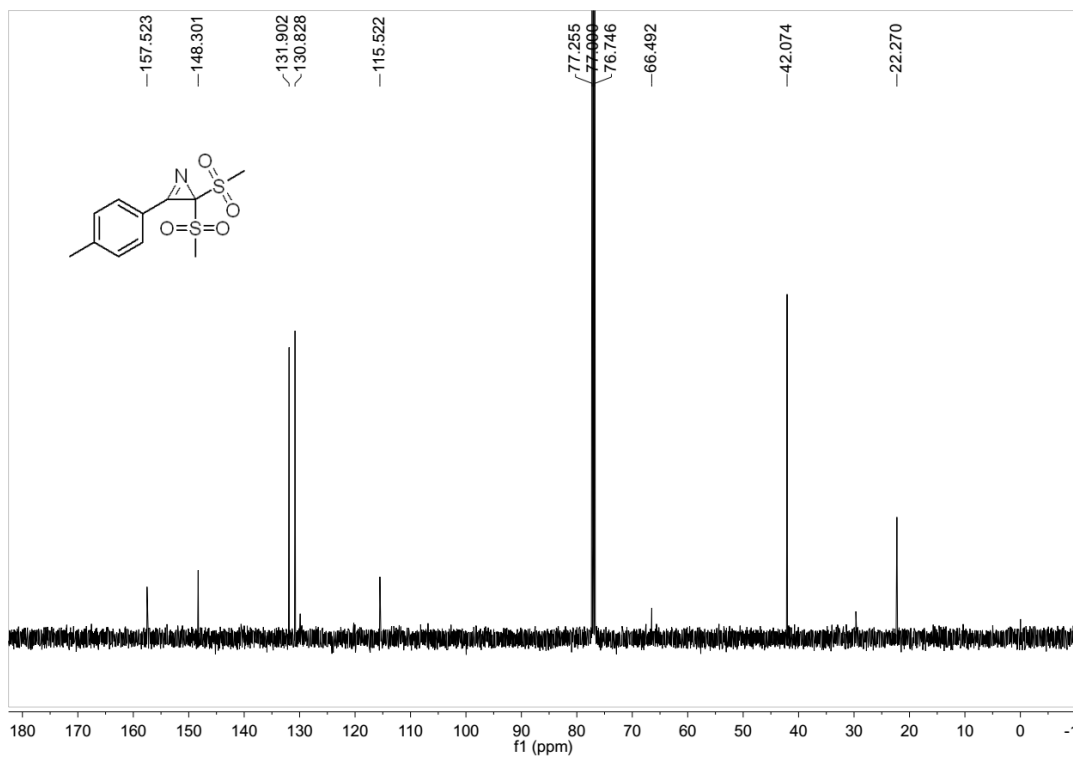

### 2,2-Bis(cyclopropylsulfonyl)-3-(*p*-tolyl)-2*H*-azirine (3ci):

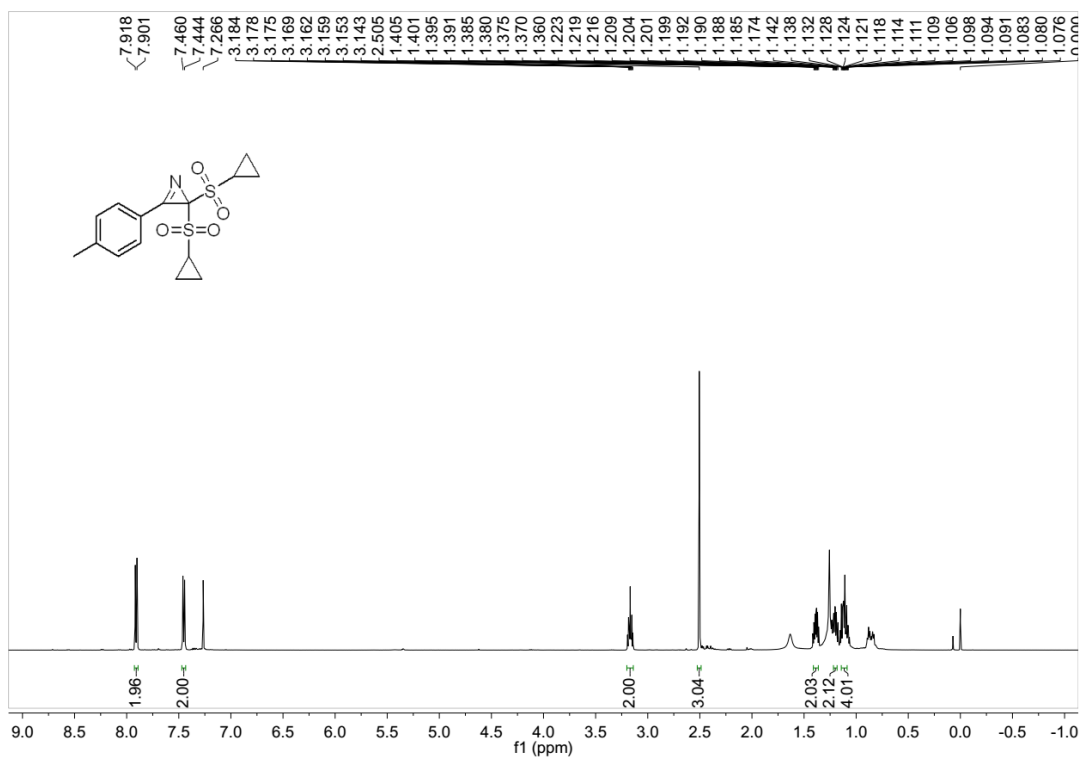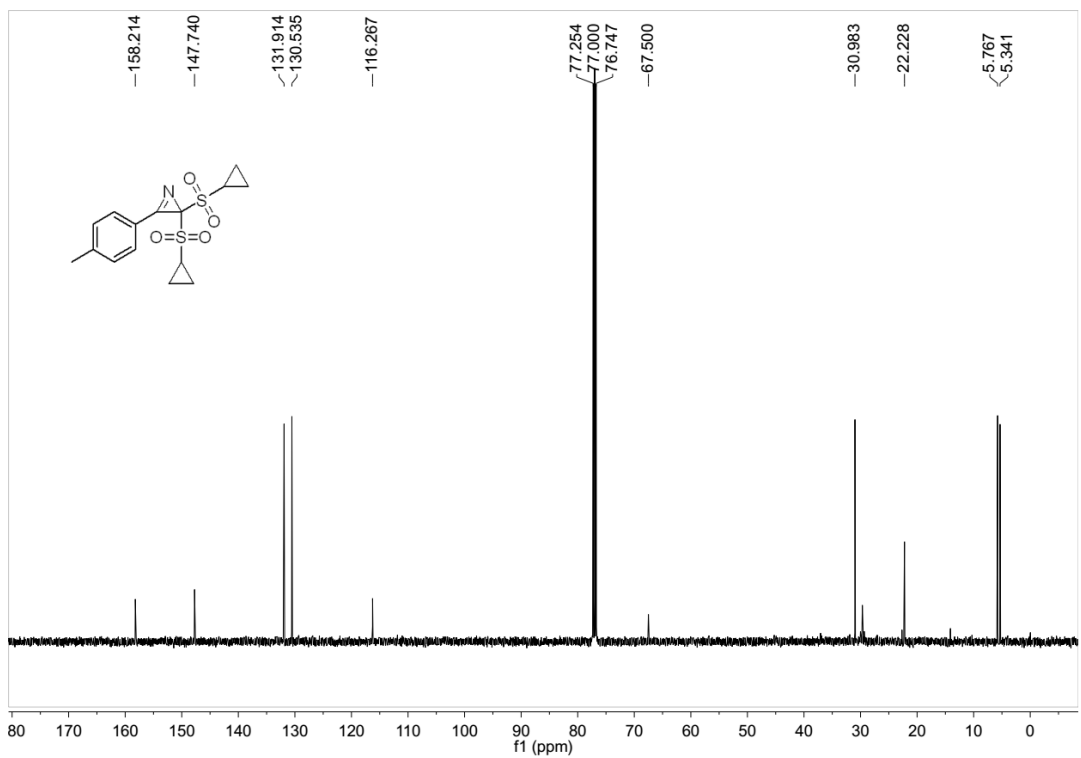

**Dimethyl 3,3'-(3-(*p*-tolyl)-2*H*-azirine-2,2-disulfonyl)dipropionate (3c<sub>j</sub>):**

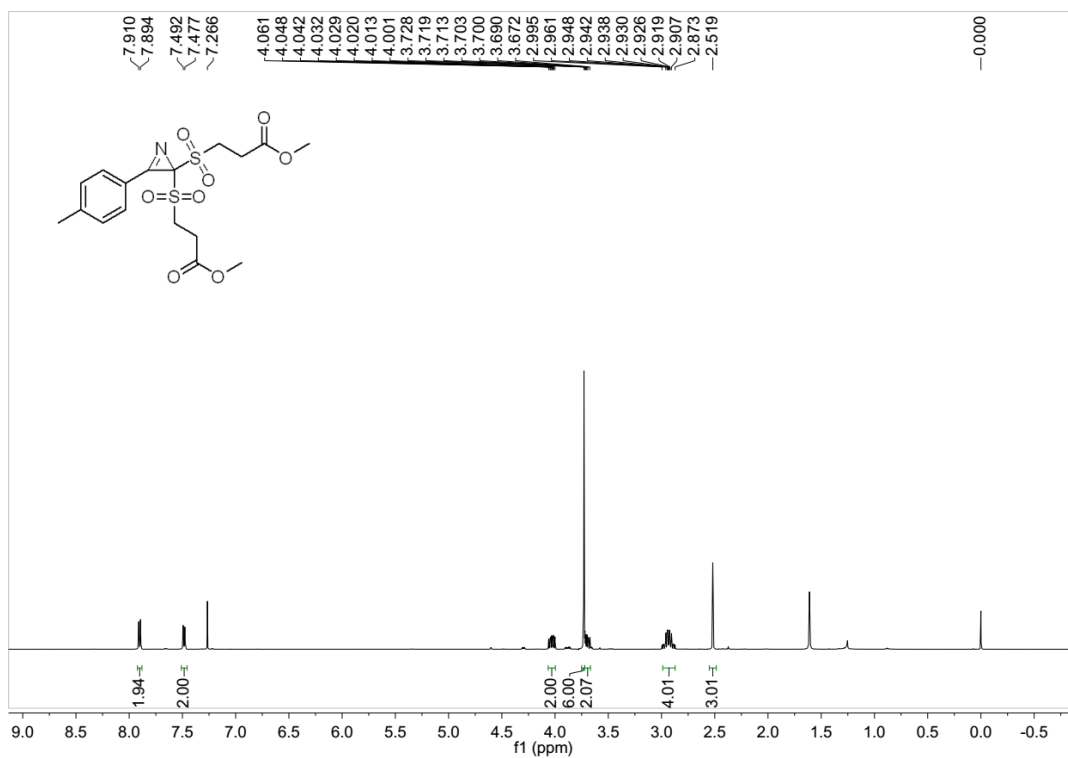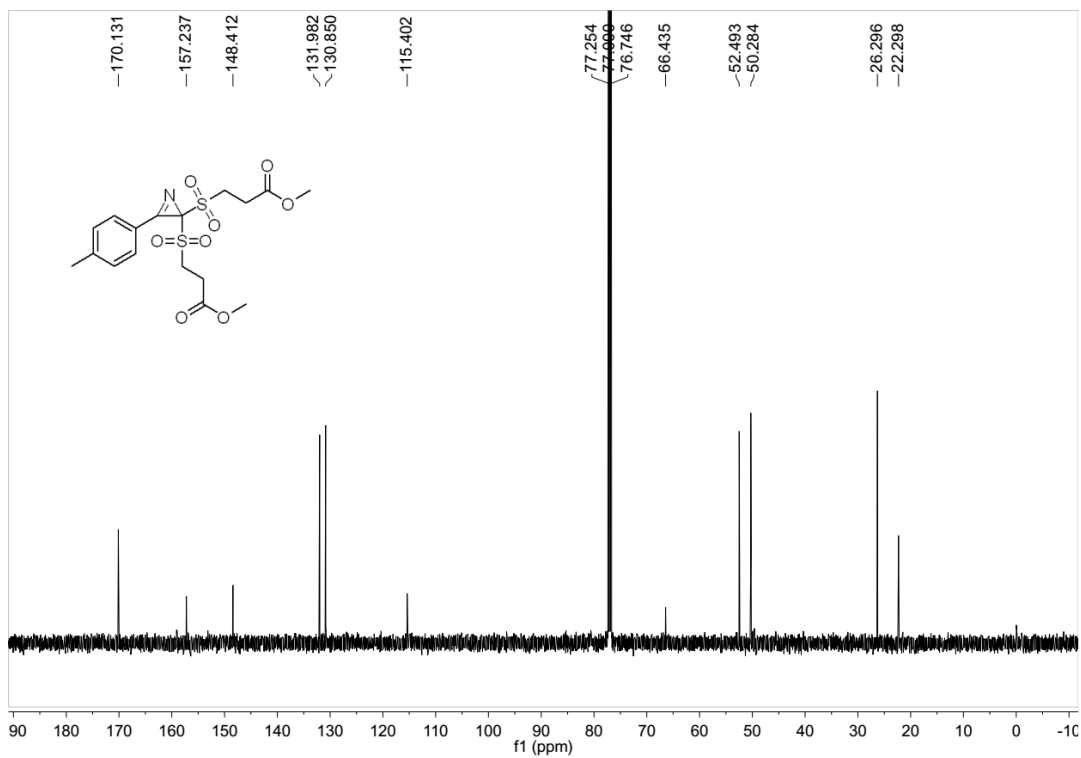

**2-(Methylsulfonyl)-3-(*p*-tolyl)-2H-azirine (3cah):**

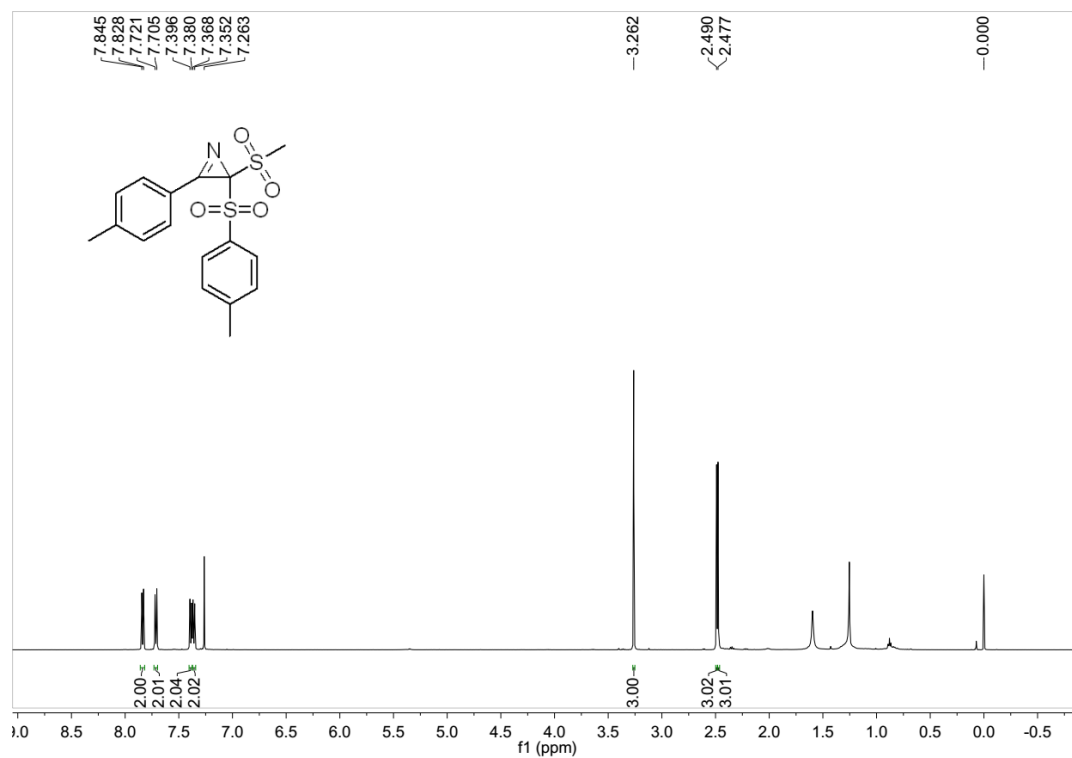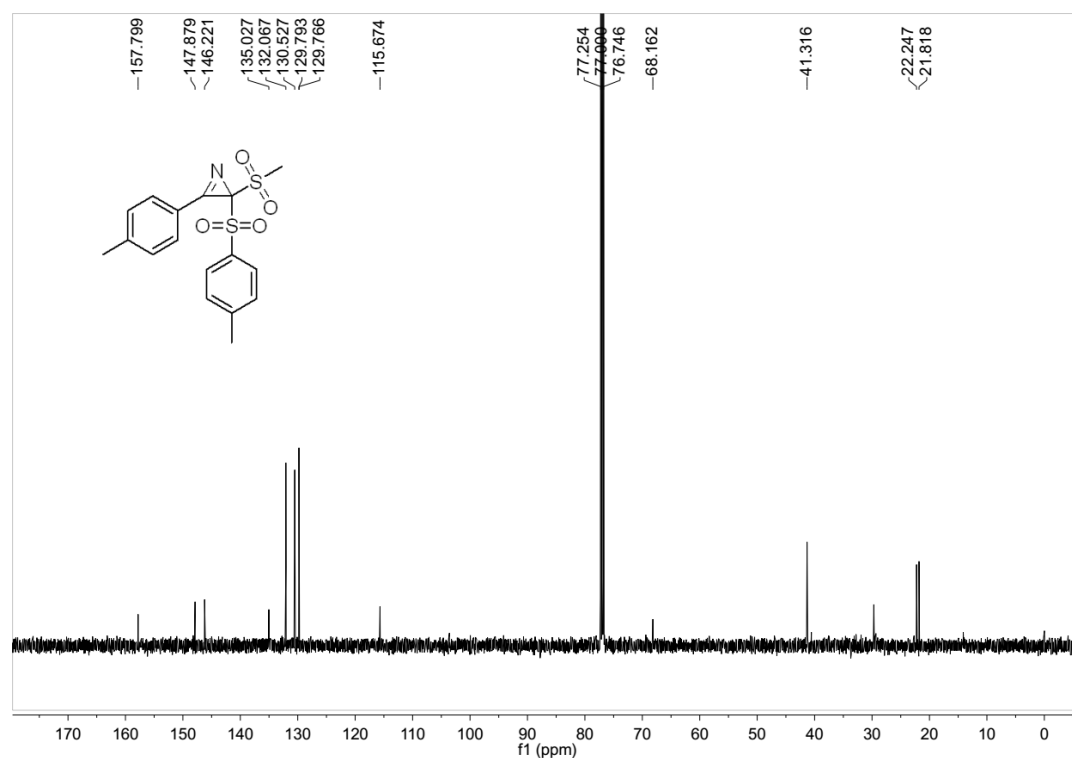

### 2,6-Di-*tert*-butyl-4-(tosylmethyl)phenol (4):

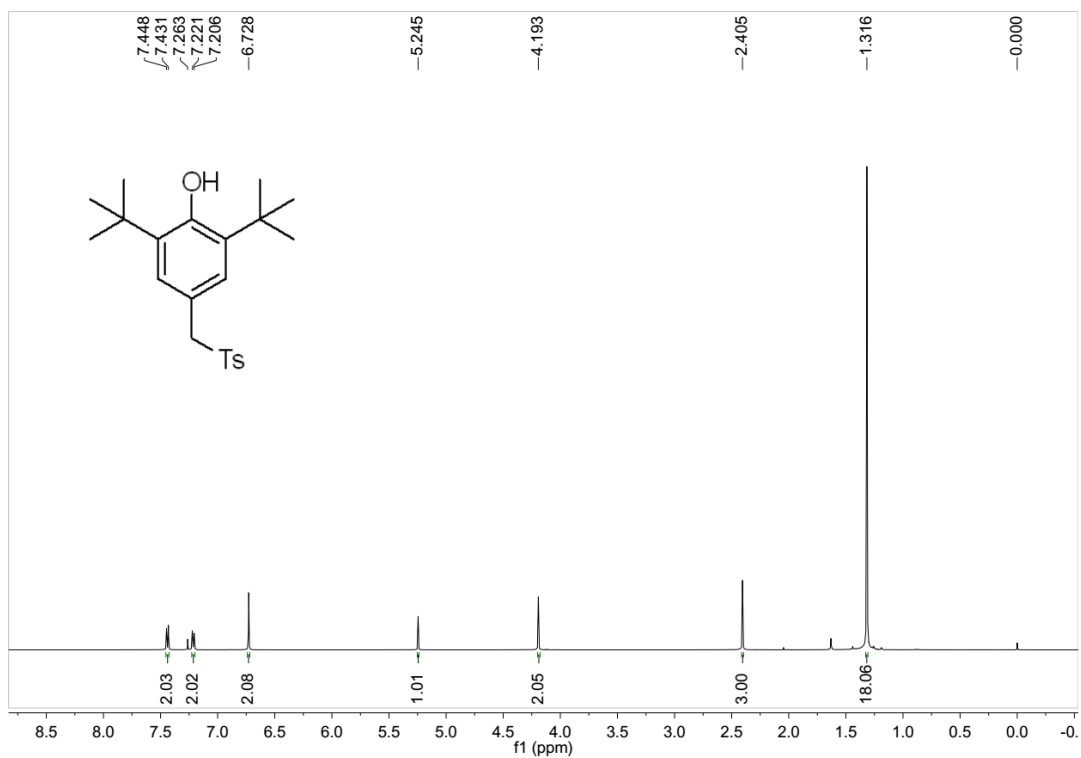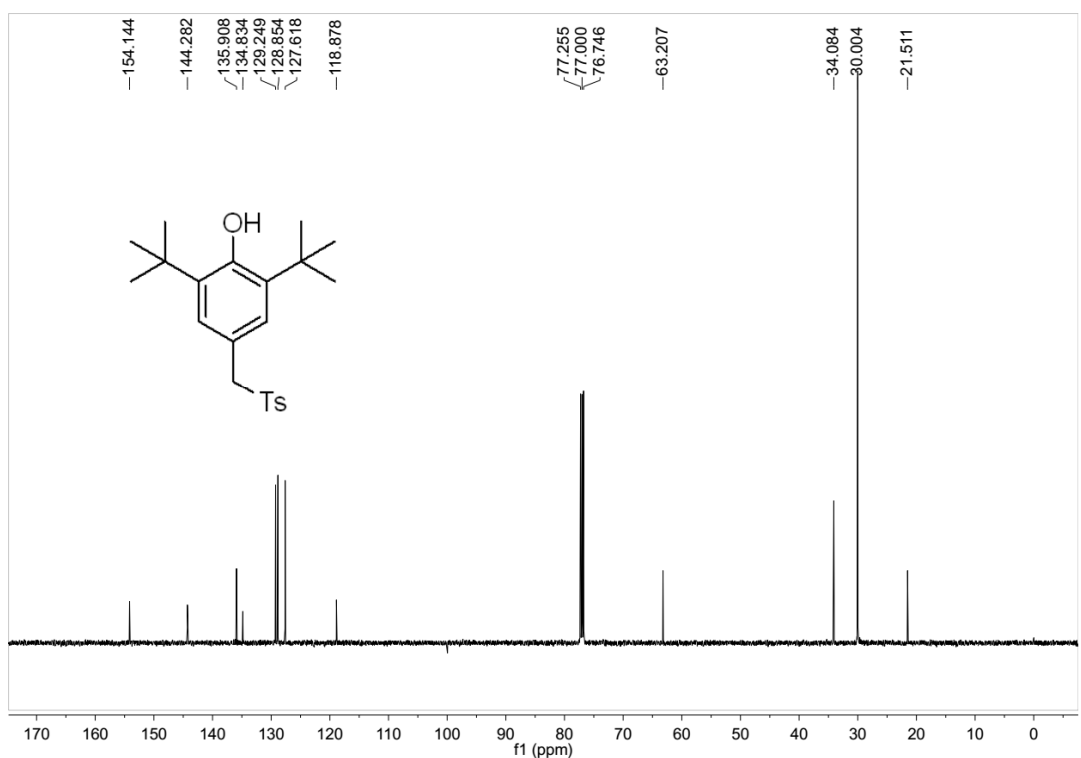



(D) The X-ray single-crystal diffraction analysis of 3aa

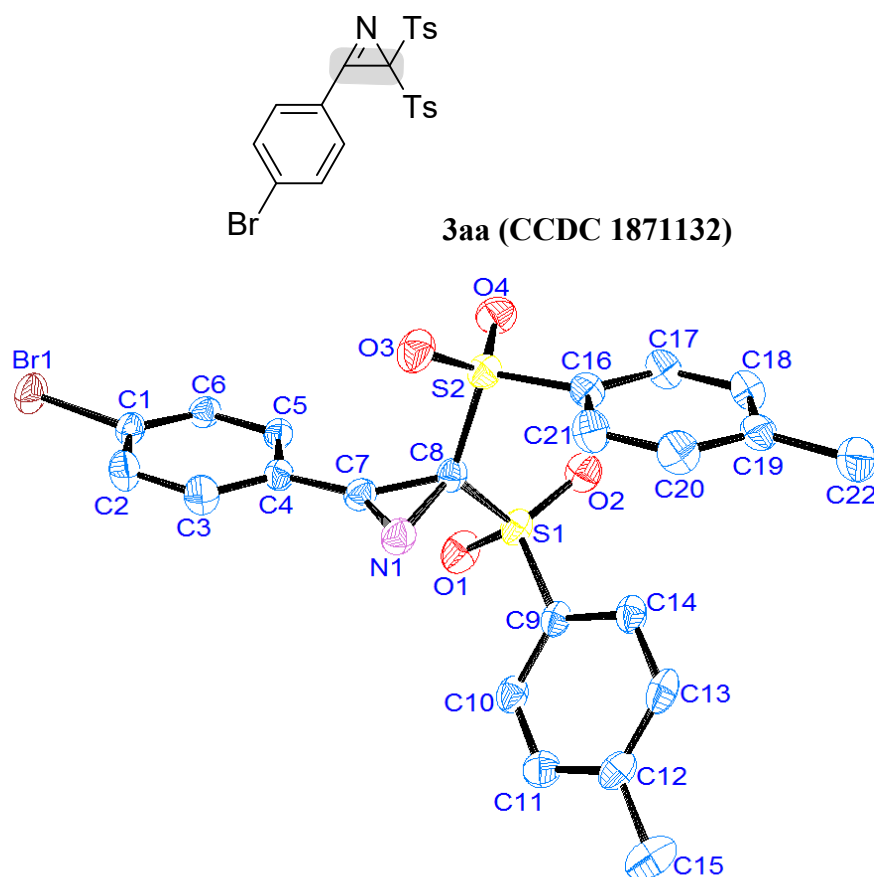

Molecular structure of 3aa with 30% probability ellipsoids

Table 1. Crystal data and structure refinement for A.

|                             |                                                                    |                          |
|-----------------------------|--------------------------------------------------------------------|--------------------------|
| Identification code         | a                                                                  |                          |
| Empirical formula           | C <sub>22</sub> H <sub>18</sub> Br N O <sub>4</sub> S <sub>2</sub> |                          |
| Formula weight              | 504.40                                                             |                          |
| Temperature                 | 296(2) K                                                           |                          |
| Wavelength                  | 0.71073 Å                                                          |                          |
| Crystal system, space group | Monoclinic, P2(1)/n                                                |                          |
| Unit cell dimensions        | a = 12.9721(15) Å                                                  | alpha = 90 deg.          |
|                             | b = 11.6133(14) Å                                                  | beta = 112.6630(10) deg. |

**c = 15.7313(19) Å    gamma = 90 deg.**

|                                         |                                                             |
|-----------------------------------------|-------------------------------------------------------------|
| <b>Volume</b>                           | <b>2186.9(5) Å<sup>3</sup></b>                              |
| <b>Z, Calculated density</b>            | <b>4, 1.532 Mg/m<sup>3</sup></b>                            |
| <b>Absorption coefficient</b>           | <b>2.099 mm<sup>-1</sup></b>                                |
| <b>F(000)</b>                           | <b>1024</b>                                                 |
| <b>Crystal size</b>                     | <b>0.18 x 0.14 x 0.12 mm</b>                                |
| <b>Theta range for data collection</b>  | <b>2.25 to 25.50 deg.</b>                                   |
| <b>Limiting indices</b>                 | <b>-15&lt;=h&lt;=15, -14&lt;=k&lt;=13, -17&lt;=l&lt;=19</b> |
| <b>Reflections collected / unique</b>   | <b>16519 / 4060 [R(int) = 0.0447]</b>                       |
| <b>Completeness to theta = 25.50</b>    | <b>99.9 %</b>                                               |
| <b>Absorption correction</b>            | <b>None</b>                                                 |
| <b>Max. and min. Transmission</b>       | <b>0.777 and 0.710</b>                                      |
| <b>Refinement method</b>                | <b>Full-matrix least-squares on F<sup>2</sup></b>           |
| <b>Data / restraints / parameters</b>   | <b>4060 / 0 / 273</b>                                       |
| <b>Goodness-of-fit on F<sup>2</sup></b> | <b>1.012</b>                                                |
| <b>Final R indices [I&gt;2sigma(I)]</b> | <b>R1 = 0.0347, wR2 = 0.0768</b>                            |
| <b>R indices (all data)</b>             | <b>R1 = 0.0732, wR2 = 0.0934</b>                            |
| <b>Largest diff. peak and hole</b>      | <b>0.334 and -0.353 e.Å<sup>3</sup></b>                     |
